# Supplementary material
Source: publisher figshare collection journal article supplement (https://acs.figshare.com/ndownloader/files/5736198)
Supplement: Supplementary file 1 [file 5736198]

# **Supporting Information**

## **Asymmetric Organocatalysis of 4 + 3 Cycloaddition Reactions**

**Michael Harmata,\* Sunil K. Ghosh, Xuechuan Hong, Sumrit  
Wacharasindhu, and Patrick Kirchhoefer**

**Department of Chemistry  
University of Missouri-Columbia  
Columbia, Missouri 65211**

**General Information:**

All reactions were carried out under an atmosphere of nitrogen in oven-dried glassware. Dichloromethane was freshly distilled from CaH<sub>2</sub>. Furans were distilled immediately prior to use. Trifluoroacetic acid (TFA), chloroform, n-butylamine, and (2*S*, 5*S*)-2-(1', 1'-Dimethylethyl)-3-methyl-5-phenylmethyl-4-imidazolidinone (**4**) were purchased from Aldrich and used without further purification. Chromatographic separations were carried out using Silicycle ultra pure silica gel (230-400 mesh). Thin layer chromatography was performed on EM Reagent 0.25 mm silica gel 60-F plates. Visualization of the developed chromatogram was performed by UV light and vanillin stain solution followed by heating.

Melting points were measured with a Fisher-Johns melting point apparatus. Infrared spectra were recorded on a Perkin Elmer 1600 series FT-IR spectrometer. Optical rotations were measured on a Jasco DIP-370 digital polarimeter. <sup>1</sup>H NMR were recorded on a Bruker ARX-250 (250 MHz), DRX-300 (300 MHz), DRX-500 (500 MHz) spectrometer and are reported in ppm (δ) from tetramethylsilane (TMS: δ 0.0 ppm). Data are reported as follows: chemical shift, multiplicity (s = singlet, d = doublet, t = triplet, q = quartet, m = multiplet, dd = doublet of doublet, ddd = doublet of doublet of doublet), coupling constants (Hz), and integration. <sup>13</sup>C NMR spectra were recorded on a Bruker ARX-250 (62.5 MHz), DRX-300 (75 MHz), and DRX-500 (125 MHz) spectrometer with complete proton decoupling. Chemical shifts are reported in ppm from tetramethylsilane with solvent resonance as the internal standard (CDCl<sub>3</sub>: δ 77.0 ppm). Analytical high performance liquid chromatography (HPLC) was performed on a Varian Pro Star model 500 using Chiralpak AD or Chiralcel OD-H column. Silyl enol ethers<sup>1</sup> and dialkyl furans<sup>2</sup> were prepared according to published methods.

**General Experimental Procedure:**

To a solution of (2*S*, 5*S*)-2-(1', 1'-Dimethylethyl)-3-methyl-5-phenylmethyl-4-imidazolidinone (**4**) in CH<sub>2</sub>Cl<sub>2</sub> (1 mL) was charged with the appropriate acid and then placed in a bath of desired temperature. The solution was stirred for 10 min before the addition of silyl enol ether (**1**, **5-7**) in CH<sub>2</sub>Cl<sub>2</sub> (1 mL). After stirring for an additional 10 min, the furan (**12-15**) (2-5 equiv) was added to it. The resulting solution was stirred at

constant temperature as mentioned in the table. The reaction mixture was then quenched with cold water and extracted with diethyl ether. The separated organic layer was dried over  $\text{MgSO}_4$  and concentrated. The residue was purified by flash chromatography to afford the 4+3 cycloadducts. For the measurement of enantiomeric excess, the product was treated with 2-3 equiv of n-butylamine in  $\text{CHCl}_3$  to give the corresponding pyrrole derivative.

**Compound 8 (Table 1):** To a solution of **4** (24.6 mg, 0.10 mmol) in  $\text{CH}_2\text{Cl}_2$  (1 mL) was added TFA (7.7  $\mu\text{L}$ , 0.10 mmol). This solution was then cooled to 0 °C and stirred for 10 min before the addition of **1** (85 mg, 0.5 mmol) in  $\text{CH}_2\text{Cl}_2$  (1 mL). After stirring for an additional 10 min, furan (363  $\mu\text{L}$ , 5 mmol) was added. The resulting solution was stirred at this temperature for 96 h. The reaction mixture was quenched with cold water, extracted with ether (3 X 5 mL), dried over  $\text{MgSO}_4$ , and concentrated. The residue was purified by flash chromatography (30 % EtOAc/hexanes) to afford **8** (*endo*) in 8 % yield as a colorless oil. IR (neat) 2973, 1725, 1708, 1335  $\text{cm}^{-1}$ ;  $^1\text{H}$  NMR (300 MHz,  $\text{CDCl}_3$ ):  $\delta$  9.82 (t,  $J$  = 1.0 Hz, 1H), 6.35 (dd,  $J$  = 1.7, 6.1 Hz, 1H), 6.22 (dd,  $J$  = 1.7, 6.1 Hz, 1H), 5.06 (ddd,  $J$  = 1.3, 2.6, 4.8 Hz, 1H), 4.95 (dd,  $J$  = 1.6, 4.6 Hz, 1H), 3.41 (ddd,  $J$  = 4.8, 6.0, 7.4 Hz, 1H), 2.86 (ddd,  $J$  = 1.3, 7.5, 18.8 Hz, 1H), 2.83 (dd,  $J$  = 5.1, 15.6 Hz, 1H), 2.36 (dd,  $J$  = 1.2, 15.6 Hz, 1H), 2.14 (ddd,  $J$  = 0.8, 6.0, 18.8 Hz, 1H);  $^{13}\text{C}$  NMR (75 MHz,  $\text{CDCl}_3$ ):  $\delta$  205.1, 199.2, 135.3, 131.2, 80.2, 78.1, 51.4, 45.6, 39.4.

**Compound 9 (Table 1):** To a solution of **8** (8 mg, 0.05 mmol) in  $\text{CHCl}_3$  (2 mL) was added n-butylamine (15  $\mu\text{L}$ , 0.14 mmol) and stirred for 6 h at room temperature. The solvent was removed and purified by a short silica gel column chromatography (10 % EtOAc/hexanes) to afford **9** (6 mg, 63%) as a colorless oil. Enantiomeric excess was determined by HPLC using a Chiralcel OD-H column [hexanes/isopropanol 99:1; flow rate 0.7 ml/min;  $t_r$  = 33.87 min and 42.70 min; 50% ee];  $[\alpha]_D^{25}$  16.0 (c 0.30,  $\text{CHCl}_3$ ); IR (neat) 2954, 2931, 1480  $\text{cm}^{-1}$ ;  $^1\text{H}$  NMR (250 MHz,  $\text{CDCl}_3$ ):  $\delta$  6.58 (dd,  $J$  = 1.6, 5.8 Hz, 1H), 6.41 (d,  $J$  = 2.6 Hz, 1H), 5.96 (d,  $J$  = 2.7 Hz, 1H), 5.87 (dd,  $J$  = 1.8, 5.8 Hz, 1H), 5.36 (d,  $J$  = 1.3 Hz, 1H), 5.14 (dd,  $J$  = 1.7, 6.0 Hz, 1H), 3.67 (t,  $J$  = 7.3 Hz, 1H), 3.12 (dd,  $J$  = 6.1, 15.7 Hz, 1H), 2.29 (d,  $J$  = 15.7 Hz, 1H), 1.72-1.60 (m, 2H), 1.39-1.24(m, 2H),

0.92 (t,  $J = 7.3$  Hz, 1H);  $^{13}\text{C}$  NMR (62.5 MHz,  $\text{CDCl}_3$ ):  $\delta$  139.9, 125.1, 122.0, 120.1, 117.3, 102.5, 77.3, 77.0, 45.9, 33.1, 26.1, 19.9, 13.6.

**Compound 16: (Table 2, entry 1):** To a solution of **4** (24.6 mg, 0.10 mmol) in  $\text{CH}_2\text{Cl}_2$  (1 mL) was added TFA (7.7  $\mu\text{L}$ , 0.10 mmol). This solution was then cooled to  $-78^\circ\text{C}$  and stirred for 10 min before the addition of **1** (85 mg, 0.5 mmol) in  $\text{CH}_2\text{Cl}_2$  (1 mL). After stirring for an additional 10 min, **12** (265  $\mu\text{L}$ , 2.5 mmol) was added. The resulting solution was stirred for 96 h. The reaction mixture was quenched by cold water, extracted by ether (3 X 5 mL), dried over  $\text{MgSO}_4$ , and concentrated. The residue was purified by flash chromatography (20 % EtOAc/hexanes) to afford **16** (*endo*) in 64 % yield as a colorless oil; IR (neat) 2980, 1722, 1707  $\text{cm}^{-1}$ ;  $^1\text{H}$  NMR (250 MHz,  $\text{CDCl}_3$ ):  $\delta$  9.83 (t,  $J = 0.9$  Hz, 1H), 6.02 (d,  $J = 5.8$  Hz, 1H), 5.92 (d,  $J = 5.8$  Hz, 1H), 3.17 (dd,  $J = 4.4, 8.6$  Hz, 1H), 2.73 (ddd,  $J = 1.8, 8.6, 17.0$  Hz, 1H), 2.60 (d,  $J = 15.4$  Hz, 1H), 2.41 (d,  $J = 15.4$  Hz, 1H), 2.22 (dd,  $J = 4.4, 16.9$  Hz, 1H), 1.49 (d,  $J = 3.6$  Hz, 6H);  $^{13}\text{C}$  NMR (125 MHz,  $\text{CDCl}_3$ ):  $\delta$  206.3, 199.8, 138.0, 134.3, 86.6, 84.3, 55.7, 50.7, 39.4, 23.2, 21.8. Anal. calcd for  $\text{C}_{11}\text{H}_{14}\text{O}_3$ : C, 68.02; H, 7.27. Found: C, 68.03; H, 6.98.

**Pyrrole derivative of compound 16:** To a solution of **16** (10 mg, 0.05 mmol) in  $\text{CHCl}_3$  (2 mL) was added n-butylamine (11  $\mu\text{L}$ , 0.10 mmol) and stirred for 6 h at room temperature. The solvent was removed and purified by a short silica gel column chromatography (8 % EtOAc/hexanes) to afford the product (8 mg, 67%) as a colorless oil. Enantiomeric excess was determined by HPLC using a Chiralpak AD column [hexanes/isopropanol 98:2; flow rate 0.5 ml/min;  $t_r = 10.24$  min and 11.86 min; 89% ee];  $[\alpha]_D^{25}$  49.1 (c 0.66,  $\text{CHCl}_3$ ); IR (neat) 2962, 1480, 1442  $\text{cm}^{-1}$ ;  $^1\text{H}$  NMR (250 MHz,  $\text{CDCl}_3$ ):  $\delta$  6.40 (d,  $J = 2.7$  Hz, 1H), 6.25 (d,  $J = 5.6$  Hz, 1H), 5.98 (d,  $J = 2.7$  Hz, 1H), 5.58 (d,  $J = 5.6$  Hz, 1H), 3.66 (t,  $J = 7.3$  Hz, 3H), 2.77 (d,  $J = 15.8$  Hz, 1H), 2.37 (d,  $J = 15.8$  Hz, 1H), 1.72-1.55 (m, 2H), 1.68 (s, 3H), 1.55 (s, 3H), 1.39-1.26 (m, 2H), 0.92 (t,  $J = 7.3$  Hz, 3H).  $^{13}\text{C}$  NMR (62.5 MHz,  $\text{CDCl}_3$ ):  $\delta$  142.5, 129.1, 124.2, 123.8, 117.1, 101.4, 83.7, 83.2, 46.1, 33.0, 32.8, 24.8, 20.0 19.9, 13.6.

**Compound 17 (Table 2, entry 6):** To a solution of **4** (24.6 mg, 0.10 mmol) in  $\text{CH}_2\text{Cl}_2$  (1 mL) was added TFA (7.7  $\mu\text{L}$ , 0.10 mmol). This solution was then cooled to  $-60^\circ\text{C}$ , stirred for 10 min, followed by the addition of **1** (85 mg, 0.5 mmol) in  $\text{CH}_2\text{Cl}_2$  (1 mL). After stirring for an additional 10 min, **13** (310 mg, 2.5 mmol) was added. The resulting

solution was stirred at this temperature for 22 h. The reaction mixture was quenched by cold water, extracted by ether (3 X 5 mL), dried over MgSO<sub>4</sub>, and concentrated. The residue was purified by flash chromatography (15 % EtOAc/hexanes) to afford **17** (*endo*) in 55 % yield as a colorless oil; IR (neat) 2970, 1711, 1708 cm<sup>-1</sup>; <sup>1</sup>H NMR (250 MHz, CDCl<sub>3</sub>): δ 9.82-9.80 (m, 1H), 6.00 (d, *J* = 5.9 Hz, 1H), 5.86 (d, *J* = 5.9 Hz, 1H), 3.18 (dd, *J* = 4.2, 8.8 Hz, 1H), 2.67 (ddd, *J* = 2.0, 8.8, 16.8 Hz, 1H), 2.56 (d, *J* = 15.3 Hz, 1H), 2.37 (d, *J* = 15.3 Hz, 1H), 2.20 (ddd, *J* = 0.5, 4.1, 16.8 Hz, 1H), 1.83-1.68 (m, 4H), 0.96 (t, *J* = 7.4 Hz, 3H), 0.93 (t, *J* = 7.4 Hz, 3H); <sup>13</sup>C NMR (62.5 MHz, CDCl<sub>3</sub>): δ 206.9, 199.9, 136.9, 133.6, 89.3, 87.3, 54.8, 49.5, 39.1, 29.2, 27.0, 8.0, 7.7. Anal. calcd for C<sub>13</sub>H<sub>18</sub>O<sub>3</sub>: C, 70.24; H, 8.16. Found: C, 69.90; H, 7.95.

**Pyrrole derivative of compound 17:** To a solution of **17** (Table 3, entry 3) (30 mg, 0.14 mmol) in CHCl<sub>3</sub> (2 mL) was added butylamine (11 μL, 0.10 mmol) and stirred for 6 h at room temperature. The solvent was removed and the residue purified by a short silica gel column chromatography (8 % EtOAc/hexanes) to afford the product (25 mg, 71%) as a colorless oil. Enantiomeric excess was determined by HPLC using a Chiralpak AD column [hexanes/isopropanol 98:2; flow rate 0.5 ml/min; t<sub>r</sub> = 9.04 min and 11.85 min; 81.3 % ee]; [α]<sub>D</sub><sup>25</sup> 35.8 (c 1.48, CHCl<sub>3</sub>). IR (neat) 2960, 1482, 1454 cm<sup>-1</sup>; <sup>1</sup>H NMR (250 MHz, CDCl<sub>3</sub>): δ 6.41 (d, *J* = 2.5 Hz, 1H), 6.24 (d, *J* = 5.6 Hz, 1H), 5.97 (d, *J* = 2.6 Hz, 1H), 5.61 (d, *J* = 5.7 Hz, 1H), 3.67 (t, *J* = 7.4 Hz, 2H), 2.75 (d, *J* = 15.7 Hz, 1H), 2.35 (d, *J* = 15.7 Hz, 1H), 2.15-2.02 (m, 2H), 1.87 (q, *J* = 7.5 Hz, 2H), 1.70-1.64 (m, 2H), 1.37-1.26 (m, 2H), 1.09-1.01 (m, 6H), 0.92 (t, *J* = 7.4 Hz, 3H); <sup>13</sup>C NMR (62.5 MHz, CDCl<sub>3</sub>): δ 141.5, 127.5, 124.7, 123.5, 117.0, 101.4, 86.8, 86.3, 46.0, 33.0, 31.5, 30.9, 26.0, 19.9, 13.6, 8.2, 8.1.

**Compound 18 (Table 2, entry 9):** To a solution of **4** (22.1 mg, 0.09 mmol) in CH<sub>2</sub>Cl<sub>2</sub> (1 mL) was added TFA (7.0 μL, 0.09 mmol). This solution was then cooled to -78 °C and stirred for 10 min before the addition of **5** (96 mg, 0.45 mmol) in CH<sub>2</sub>Cl<sub>2</sub> (1 mL). After stirring for an additional 10 min, **14** (342mg, 2.25 mmol) was added. The resulting solution was stirred at this temperature for 95 h. The reaction mixture was quenched with cold water, extracted with ether (3 X 5 mL), dried over MgSO<sub>4</sub>, and concentrated. The residue was purified by flash chromatography (20 % EtOAc/hexanes) to afford **18** (*endo*) in 74 % yield as a colorless oil. IR (neat) 2962, 2864, 2733, 1719 cm<sup>-1</sup>; <sup>1</sup>H NMR (300

MHz, CDCl<sub>3</sub>):  $\delta$  9.82-9.80 (m, 1H), 5.99 (d,  $J$  = 6.2 Hz, 1H), 5.86 (d,  $J$  = 5.7 Hz, 1H), 3.17 (dd,  $J$  = 4.2, 8.9 Hz, 1H), 2.67 (ddd,  $J$  = 2.5, 10.0, 17.5 Hz, 1H), 2.56 (d,  $J$  = 12.4 Hz, 1H), 2.37 (d,  $J$  = 15.3 Hz, 1H), 2.21 (dd,  $J$  = 4.1, 17.5 Hz, 1H), 1.82-1.61 (m, 4H), 1.61-1.41 (m, 2H), 1.41-1.21 (m, 2H), 1.03-0.88 (m, 6H); <sup>13</sup>C NMR (75 MHz, CDCl<sub>3</sub>):  $\delta$  206.8, 199.9, 136.9, 133.6, 88.9, 86.9, 55.1, 49.8, 39.1, 38.6, 36.5, 17.1, 16.9, 14.3, 14.2; HRMS calcd for C<sub>15</sub>H<sub>22</sub>O<sub>3</sub>Na [M + Na]<sup>+</sup> 273.14611, found 273.14780.

**Pyrrole derivative of compound 18:** To a solution of **18** (30 mg, 0.119 mmol) in CHCl<sub>3</sub> (6 mL) was added n-butylamine (23  $\mu$ L, 0.239 mmol) and stirred for 10 h at room temperature. The solvent was removed and purified by a short silica gel column chromatography (10 % EtOAc/hexanes) to afford the product as a colorless oil (34 mg, 99%). Enantiomeric excess was determined by HPLC using a Chiralcel AD column [hexane/isopropanol 98:2; flow rate 0.5 ml/min;  $t_r$  = 9.60 and 11.18 min; 85%ee]; IR: 2990, 2962, 1486, 1466, 1271 cm<sup>-1</sup>; <sup>1</sup>H NMR (250 MHz, CDCl<sub>3</sub>):  $\delta$  6.41 (d,  $J$  = 2.5 Hz, 1H), 6.23 (d,  $J$  = 5.7 Hz, 1H), 5.97 (d,  $J$  = 2.7 Hz, 1H), 5.60 (d,  $J$  = 5.5 Hz, 1H), 3.67 (t,  $J$  = 7.3 Hz, 2H), 2.75 (d,  $J$  = 15.7 Hz, 1H), 2.34 (d,  $J$  = 15.7), 2.07-1.28 (m, 12H), 1.07-0.90 (m, 9H); <sup>13</sup>C NMR (62.5 MHz, CDCl<sub>3</sub>):  $\delta$  141.6, 127.5, 124.5, 123.7, 117.0, 101.3, 86.3, 85.9, 46.0, 40.6, 35.5, 33.0, 31.8, 19.9, 17.3, 14.6, 13.6.

**Compound 19 (Table 2, entry 11):** To a solution **4** (24.6 mg, 0.10 mmol) in CH<sub>2</sub>Cl<sub>2</sub> (1 mL) was added TFA (7.7  $\mu$ L, 0.10 mmol). This solution was cooled to -35 °C and stirred for 10 min before the addition of **1** (85 mg, 0.5 mmol) in CH<sub>2</sub>Cl<sub>2</sub> (1 mL). After stirring for an additional 10 min, **15** (270 mg, 1 mmol) was added. The resulting solution was stirred at this temperature for 12 h. The reaction mixture was quenched with cold water, extracted with ether (3 X 5 mL), dried over MgSO<sub>4</sub>, and concentrated. The residue was purified by flash chromatography (15 % EtOAc/hexanes) to afford **19** as *endo:exo* isomers (3.7:1) in 56 % yield as a white crystalline solid. *Endo* isomer:  $R_f$  = 0.43 (25% EtOAc/hexanes); mp 222-224 °C; IR (film) 2835, 1719, 1709 cm<sup>-1</sup>; <sup>1</sup>H NMR (250 MHz, CDCl<sub>3</sub>):  $\delta$  9.81 (s, 1H), 7.64-7.18 (m, 13H), 7.00-6.97 (m, 1H), 4.26 (dd,  $J$  = 2.2, 9.9 Hz, 1H), 3.28 (d,  $J$  = 14.8 Hz, 1H), 3.14 (d,  $J$  = 14.8 Hz, 1H), 2.63 (dd,  $J$  = 9.9, 17.5 Hz, 1H), 2.37 (dd,  $J$  = 2.2, 17.5 Hz, 1H); <sup>13</sup>C NMR (62.5 MHz, CDCl<sub>3</sub>):  $\delta$  205.6, 198.9, 146.7, 141.3, 139.9, 137.2, 129.1, 128.9, 128.5, 128.3, 128.0, 127.9, 125.8, 122.8, 121.7, 88.6, 85.9, 52.5, 50.7, 40.0; Anal. calcd for C<sub>25</sub>H<sub>20</sub>O<sub>3</sub>: C, 81.50; H 5.47. Found: C, 81.71; H,

5.51; *Exo* isomer:  $R_f = 0.21$  (25% EtOAc/hexanes); mp 172-173 °C; IR (film) 2835, 1719, 1709  $\text{cm}^{-1}$ ;  $^1\text{H}$  NMR (250 MHz,  $\text{CDCl}_3$ ):  $\delta$  9.57 (t,  $J = 1.9$  Hz, 1H), 7.64-7.18 (m, 14H), 3.70 (t,  $J = 6.5$  Hz, 1H), 3.28 (d,  $J = 15.4$  Hz, 1H), 3.11 (d,  $J = 15.4$  Hz, 1H), 2.68 (d,  $J = 1.3$  Hz, 1H), 2.65 (d,  $J = 1.9$  Hz, 1H);  $^{13}\text{C}$  NMR (62.5 MHz,  $\text{CDCl}_3$ ):  $\delta$  206.8, 198.8, 145.0, 143.6, 140.2, 138.6, 129.0, 128.8, 128.6, 128.5, 128.2, 125.9, 125.0, 121.3, 121.2, 87.3, 85.8, 53.8, 49.2, 42.5. Anal. calcd for  $\text{C}_{25}\text{H}_{20}\text{O}_3$ : C, 81.50; H 5.47. Found: C, 81.56; H, 5.68.

**Pyrrole derivative of compound 19:** To a solution of **19** (30 mg, 0.02 mmol) in  $\text{CHCl}_3$  (2 mL) was added n-butylamine (10  $\mu\text{L}$ , 0.09 mmol) and stirred for 6 h at room temperature. The solvent was removed and purified by a short silica gel column chromatography (8 % EtOAc/hexanes) to afford the product as a colorless solid (25 mg, 76%). *Endo*: Enantiomeric excess was determined by HPLC using a Chiralcel OD-H column [hexanes/isopropanol 98:2; flow rate 1 ml/min;  $t_r = 8.25$  min and 12.42 min; 12 % ee]; *Exo*: Enantiomeric excess was determined by HPLC using a Chiralcel OD-H column [hexanes/isopropanol 98:2; flow rate 1 ml/min;  $t_r = 9.46$  min and 13.70 min; 68 % ee]; IR (film) 2953, 2925, 1486  $\text{cm}^{-1}$ ;  $^1\text{H}$  NMR (250 MHz,  $\text{CDCl}_3$ ):  $\delta$  8.00-7.95 (m, 2H), 7.75-7.70 (m, 2H), 7.53-7.33 (m, 6H), 7.11-6.94 (m, 4H), 6.45 (d,  $J = 2.8$  Hz, 1H), 6.08 (d,  $J = 2.8$  Hz, 1H), 3.72-3.64 (m, 2H), 3.48 (d,  $J = 15.1$  Hz, 1H), 3.15 (d,  $J = 15.0$  Hz, 1H), 1.70-1.58 (m, 2H), 1.33-1.21 (m, 2H), 0.88 (t,  $J = 7.2$  Hz, 3H);  $^{13}\text{C}$  NMR (62.5 MHz,  $\text{CDCl}_3$ ):  $\delta$  150.8, 144.9, 143.3, 139.0, 128.2, 128.0, 127.5, 127.1, 126.1, 125.4, 124.0, 123.1, 121.5, 118.8, 118.5, 103.0, 86.4, 84.6, 46.1, 33.7, 33.0, 19.9, 13.6.

**Compound 21 (Eqn. 2):** To a solution of **4** (24.6 mg, 0.10 mmol) in  $\text{CH}_2\text{Cl}_2$  (1 mL) was added TFA (7.7  $\mu\text{L}$ , 0.10 mmol). This solution was cooled to  $-30$  °C and stirred for 10 min before the addition of **20** (92 mg, 0.5 mmol) in  $\text{CH}_2\text{Cl}_2$  (1 mL). After stirring for an additional 10 min, **12** (265  $\mu\text{L}$ , 2.5 mmol) was added. The resulting solution was stirred at this temperature for 96 h. The reaction mixture was quenched with cold water, extracted with ether (3 X 5 mL), dried over  $\text{MgSO}_4$ , and concentrated. The residue was purified by flash chromatography (20 % EtOAc/hexanes) to afford **21** (*endo*) (67 mg, 64%) as a colorless oil; IR(neat) 2974, 2921, 1723, 1705  $\text{cm}^{-1}$ ;  $^1\text{H}$  NMR (500 MHz,  $\text{CDCl}_3$ ):  $\delta$  9.84 (dd,  $J = 1.2, 3.1$  Hz, 1H), 6.04 (d,  $J = 5.9$  Hz, 1H), 5.95 (d,  $J = 5.9$  Hz, 1H), 3.23 (dd,  $J = 4.2, 9.1$  Hz, 1H), 2.70 (ddd,  $J = 1.9, 9.1, 16.8$  Hz, 1H), 2.61 (q,  $J = 7.0$

Hz, 1H), 2.21 (ddd,  $J = 0.8, 4.1, 16.7$  Hz, 1H), 1.51 (s, 3H), 1.47 (s, 3H), 1.00 (d,  $J = 7.0$  Hz, 3H);  $^{13}\text{C}$  NMR (125 MHz,  $\text{CDCl}_3$ ):  $\delta$  207.7, 200.0, 136.7, 135.6, 87.8, 86.7, 55.8, 54.6, 39.7, 21.9, 21.8, 10.1; HRMS calcd for  $\text{C}_{12}\text{H}_{16}\text{O}_3\text{Na}$   $[\text{M} + \text{Na}]^+$  231.0992, found 231.0992.

**Pyrrole derivative of compound 21:** To a solution of **21** (21 mg, 0.1 mmol) in  $\text{CHCl}_3$  (3 mL) was added n-butylamine (14.6  $\mu\text{L}$ , 0.2 mmol) and refluxed for 24 hrs. The solvent was removed and the residue purified by a short silica gel column chromatography (8 % EtOAc/hexanes) to afford the product (9 mg, 37%) as a colorless oil. Enantiomeric excess was determined by HPLC using a Chiralpak AD column [hexanes/isopropanol 98:2; flow rate 0.5 mL/min;  $t_r = 9.96$  min and 10.59 min; 9 % ee];  $[\alpha]_D^{25}$  8.0 (c 0.85,  $\text{CHCl}_3$ ); IR(neat) 2966, 2929, 2868, 1589, 1454  $\text{cm}^{-1}$ ;  $^1\text{H}$  NMR (300 MHz,  $\text{CDCl}_3$ ):  $\delta$  6.38-6.29 (m, 2H), 5.95 (d,  $J = 2.8$  Hz, 1H), 5.65 (d,  $J = 5.7$  Hz, 1H), 3.81-3.69 (m, 2H), 2.97 (q,  $J = 7.1$  Hz, 1H), 1.78-1.66 (m, 2H), 1.63 (s, 3H), 1.57 (s, 3H), 1.42-1.25 (m, 2H), 1.16 (d,  $J = 7.1$  Hz, 3H) 0.94 (t,  $J = 7.3$  Hz, 3H).  $^{13}\text{C}$  NMR (125 MHz,  $\text{CDCl}_3$ ):  $\delta$  143.7, 129.5, 128.7, 124.1, 117.7, 101.4, 87.1, 83.4, 47.1, 38.8, 33.1, 22.6, 20.2, 20.1, 13.7, 13.1.

**Compound 22 (Eqn. 2):** To a solution of **4** (24.6 mg, 0.10 mmol) in  $\text{CH}_2\text{Cl}_2$  (1 mL) was added TFA (7.7  $\mu\text{L}$ , 0.10 mmol). This solution was cooled to  $-30^\circ\text{C}$  and stirred for 10 min before the addition of **20** (92 mg, 0.5 mmol) in  $\text{CH}_2\text{Cl}_2$  (1 mL). After stirring for an additional 10 min, furan (181  $\mu\text{L}$ , 2.5 mmol) was added. The resulting solution was stirred at this temperature for 96 h. The reaction mixture was quenched with cold water, extracted with ether (3 X 5 mL), dried over  $\text{MgSO}_4$ , and concentrated. The residue was purified by flash chromatography (20 % EtOAc/hexanes) to afford **22** (*endo*) (63 mg, 64%) as a colorless oil. IR (neat) 2970, 1728, 1703  $\text{cm}^{-1}$ ;  $^1\text{H}$  NMR (500 MHz,  $\text{CDCl}_3$ ):  $\delta$  9.84 (s, 1H), 6.36 (dd,  $J = 1.5, 4.7$  Hz, 1H), 6.26 (dd,  $J = 1.5, 6.1$  Hz, 1H), 4.93 (dd,  $J = 1.5, 4.5$  Hz, 1H), 4.88 (dd,  $J = 1.5, 4.5$  Hz, 1H), 3.42 (m, 1H), 2.89 (m, 1H), 2.82 (dd,  $J = 7.9, 17.5$  Hz, 1H), 2.12 (dd,  $J = 5.71, 7.5$  Hz, 1H), 0.97 (d,  $J = 7.0$  Hz, 3H);  $^{13}\text{C}$  NMR (125 MHz,  $\text{CDCl}_3$ ):  $\delta$  206.9, 199.5, 134.2, 132.8, 82.7, 81.2, 50.6, 50.4, 39.5, 10.0; HRMS calcd for  $\text{C}_{10}\text{H}_{12}\text{O}_3\text{Na}$   $[\text{M} + \text{Na}]^+$  203.0679, found 203.0680.

**Pyrrole derivative of compound 22:** To a solution of **22** (28 mg, 0.15 mmol) in  $\text{CHCl}_3$  (3 mL) was added n-butylamine (56  $\mu\text{L}$ , 0.77 mmol) and refluxed for 24 hrs. The solvent was removed and purified by a short silica gel column chromatography (8 %



EtOAc/hexanes) to afford the product as a colorless oil (14 mg, 43%). Enantiomeric excess was determined by HPLC using a Chiralpak AD column [hexanes/isopropanol 98:2; flow rate 0.5 ml/min;  $t_r$  = 17.73 min and 24.33 min; 7% ee]; IR (neat) 2970, 2917, 1589, 1470  $\text{cm}^{-1}$ ;  $^1\text{H}$  NMR (250 MHz,  $\text{CDCl}_3$ ):  $\delta$  6.72 (dd,  $J$  = 1.5, 5.8 Hz, 1H), 6.35 (d,  $J$  = 2.3 Hz, 1H), 5.94 (d,  $J$  = 2.7 Hz, 1H), 5.88 (dd,  $J$  = 1.7, 5.9 Hz, 1H), 5.25 (d,  $J$  = 1.7 Hz, 1H), 4.96 (dd,  $J$  = 1.5, 5.7 Hz, 1H), 1.70 (m, 2H), 1.32 (m, 2H), 1.14 (d,  $J$  = 7.1 Hz, 3H), 0.94 (t,  $J$  = 7.3 Hz, 3H).  $^{13}\text{C}$  NMR (62.5 MHz,  $\text{CDCl}_3$ ):  $\delta$  142.0, 125.3, 120.3, 117.9, 112.7, 102.6, 82.0, 79.0, 47.2, 33.1, 32.6, 20.1, 13.7, 13.2.

### Relative Stereochemistry of **21**:

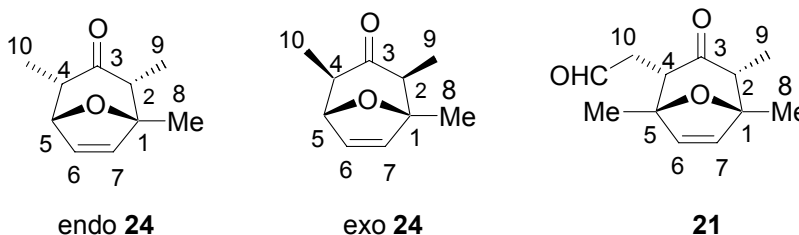

The determination of the relative stereochemistry of **21** was made by NOESY experiments.<sup>3</sup> From these experiments, we observed the following cross peaks:  $\text{CH}_2$ -10 and H-6 (intense),  $\text{CH}_3$ -9 and H-7 (intense). We can therefore assign to **21**, the structure shown. Further support for this stereochemical assignment comes from a comparison of the chemical shifts of H-2, H-8, H-9 in **21** with the endo and exo isomers of **24** (Table 1).<sup>4</sup> Further support was from a comparison of  $^{13}\text{C}$  chemical shift of C-4, C-8 and C-9 in **21** with the endo and exo isomers of **24** (Table 2).<sup>4</sup>

Table 1.  $^1\text{H}$  Chemical shifts,  $\delta$  (ppm), in  $\text{CDCl}_3$  of **21** and diastereoisomeric pairs of **24**

| Compound       | H-2  | H-4  | H-6  | H-7  | H-8  | H-9  |
|----------------|------|------|------|------|------|------|
| endo <b>24</b> | 2.57 | 2.77 | 6.25 | 6.12 | 1.51 | 0.96 |
| exo <b>24</b>  | 2.26 | 2.26 | 6.19 | 6.04 | 1.39 | 1.26 |
| <b>21</b>      | 2.61 | 3.23 | 6.04 | 5.95 | 1.51 | 1.0  |

Table 2.  $^{13}\text{C}$  Chemical shifts,  $\delta$  (ppm), in  $\text{CDCl}_3$  of **21** and diastereoisomeric pairs of **24**

| Compound       | C-2   | C-4   | C-6    | C-7    | C-8   | C-9   |
|----------------|-------|-------|--------|--------|-------|-------|
| endo <b>24</b> | 49.27 | 55.36 | 136.31 | 132.89 | 21.33 | 9.75  |
| exo <b>24</b>  | 48.78 | 53.35 | 137.75 | 133.29 | 19.68 | 14.54 |
| <b>21</b>      | 54.58 | 55.8  | 136.68 | 135.59 | 21.9  | 10.1  |

- [1] Ohno, M.; Mori, K.; Hattori, T.; Eguchi, S. *J. Org. Chem.*, **1990**, 55, 6086.
- [2] McKeown, N. B.; Chambrier, I.; Cook, M. J. *J. Chem. Soc., Perkin Trans. 1* **1990**, 1169.
- [3] Montana, A. M.; Grima G. M.; Garcia, F. *Magn. Reson. Chem.* **1999**, 37, 507-511.
- [4] Montana, A. M.; Ribes S.; Grima G. M.; Garcia, F. *Magn. Reson. Chem.* **1998**, 36, 174-180.

sg-4-120-furan adduct-1H NMR

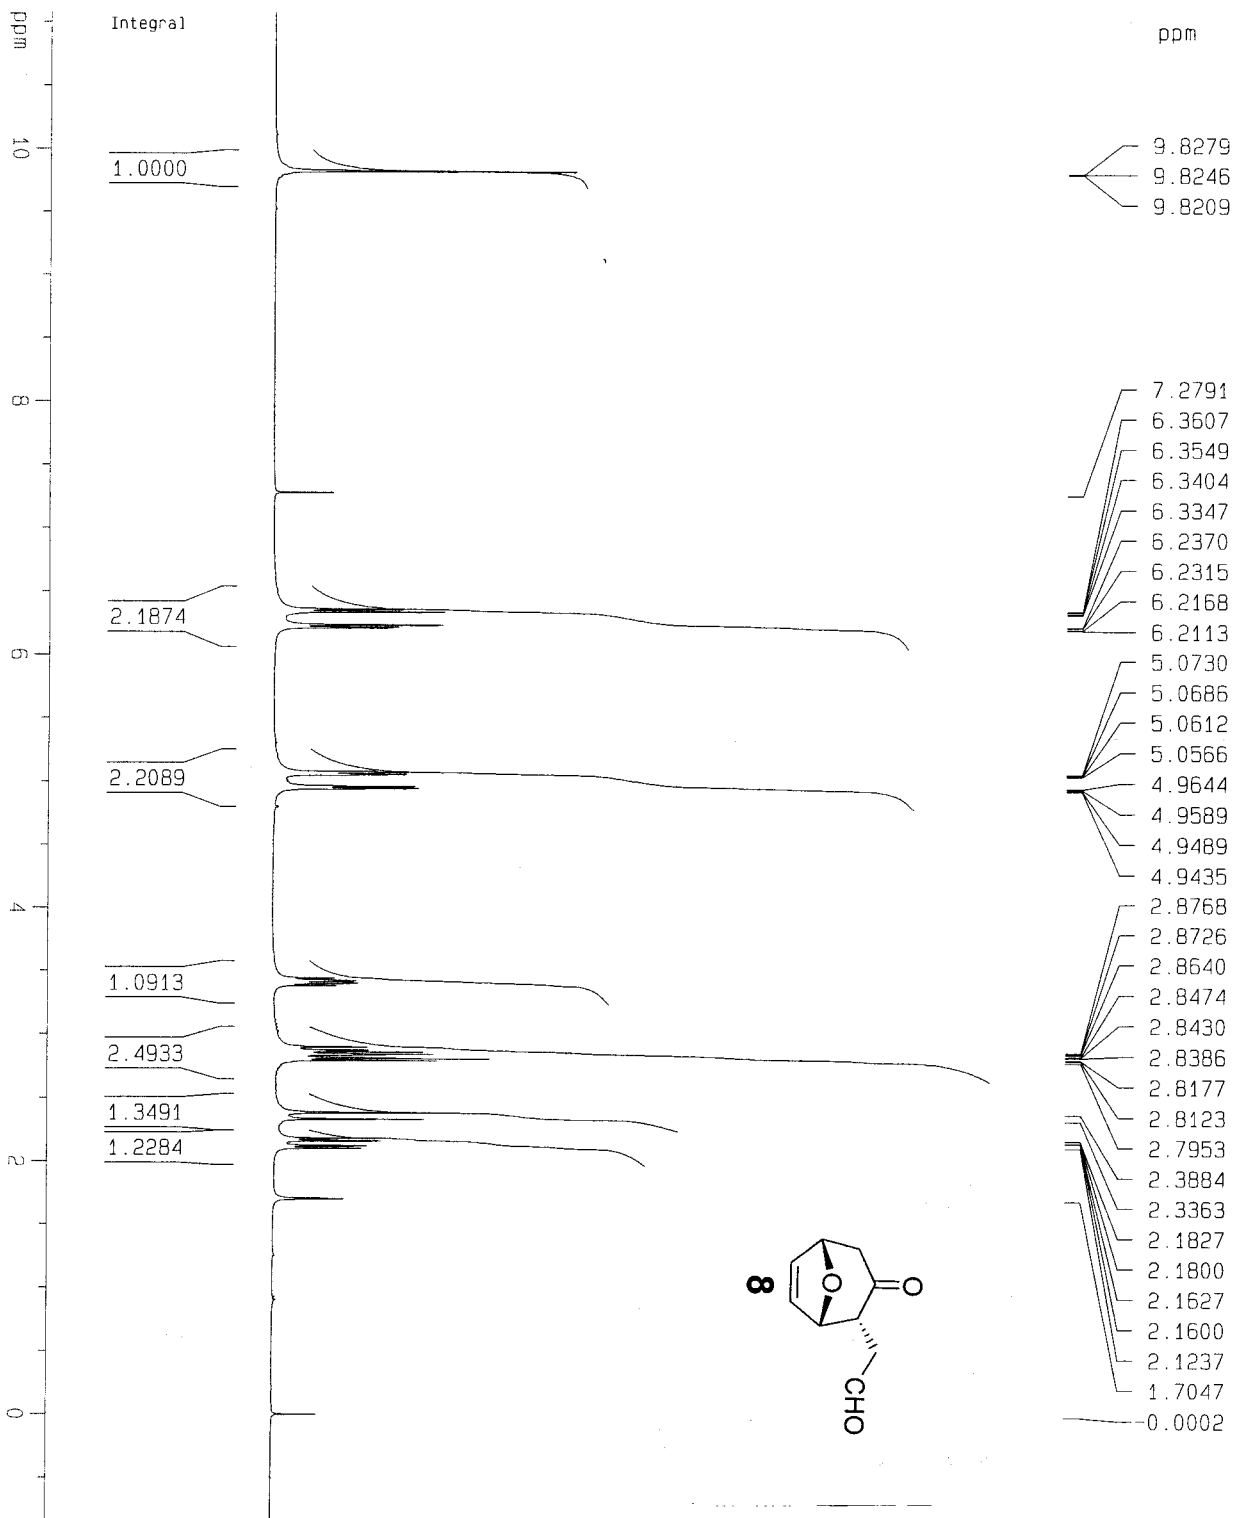

Current Data Parameters  
NAME sg-4-120  
EXPNO 1  
PROCNO 1

F2 - Acquisition Parameters  
Date\_ 20020702  
Time 20.41  
INSTRUM drx300  
PROBHD 5 mm Multinuc1  
PULPROG zg30  
TD 32768  
SOLVENT CDCl3  
NS 16  
DS 2  
SWH 6172.839 Hz  
FIDRES 0.188380 Hz  
AQ 2.6542580 sec  
RG 228.1  
DM 81.000 usec  
DE 6.00 usec  
TE 300.0 K  
D1 1.00000000 sec

===== CHANNEL f1 =====  
NUC1 1H  
P1 7.50 usec  
PL1 0.00 dB  
SF01 300.1318534 MHz

F2 - Processing parameters  
SI 32768  
SF 300.1300001 MHz  
WDW EM  
SSB 0  
LB 0.30 Hz  
GB 0  
PC 1.30

1D NMR plot parameters  
CX 20.00 cm  
CY 4.00 cm  
F1P 11.080 ppm  
F1 3325.35 Hz  
F2P -0.845 ppm  
F2 -253.58 Hz  
PPMCM 0.59623 ppm/cm  
HZCM 178.94669 Hz/cm

sg-4-120-furan adduct-13C NMR

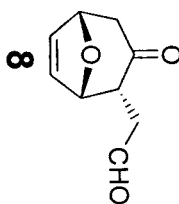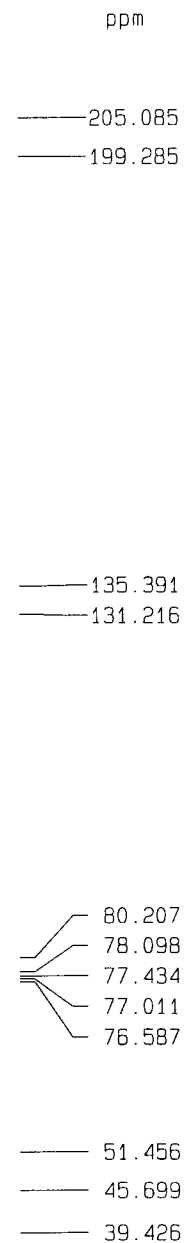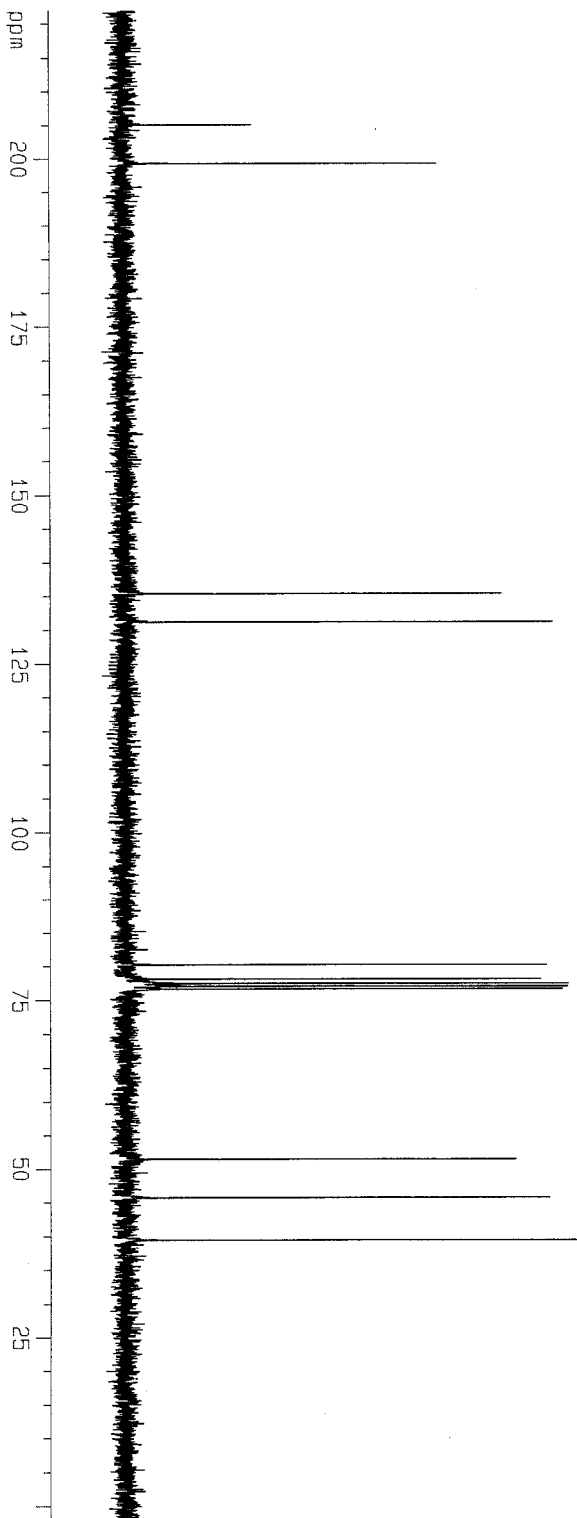

Current Data Parameters

NAME sg-4-120

EXPNO 2

PROCNO 1

F2 - Acquisition Parameters

Date\_ 20020702

Time 20.52

INSTRUM drx300

PROBHD 5 mm Multinuc1

PULPROG zgpg30

TD 65536

SOLVENT CDCl3

NS 306

DS 4

SWH 18832.578 Hz

FIDRES 0.287362 Hz

AQ 1.7400136 sec

RG 32768

DW 26.550 usec

DE 6.00 usec

TE 300.0 K

D1 1.00000000 sec

d11 0.03000000 sec

===== CHANNEL f1 =====

NUC1 13C

P1 7.75 usec

PL1 6.00 dB

SFO1 75.4760107 MHz

===== CHANNEL f2 =====

CPDPRG2 waltz16

NUC2 1H

PCPD2 100.00 usec

PL2 120.00 dB

PL12 24.50 dB

SFO2 300.1312005 MHz

F2 - Processing parameters

SI 32768

SF 75.467519 MHz

WDW EM

SSB 0

LB 1.00 Hz

GB 0

PC 1.40

1D NMR plot parameters

CX 20.00 cm

CY 6.00 cm

F1P 222.039 ppm

F1 16756.80 Hz

F2P -2.064 ppm

F2 -155.79 Hz

PPMCM 11.20518 ppm/cm

HZCM 845.62946 Hz/cm

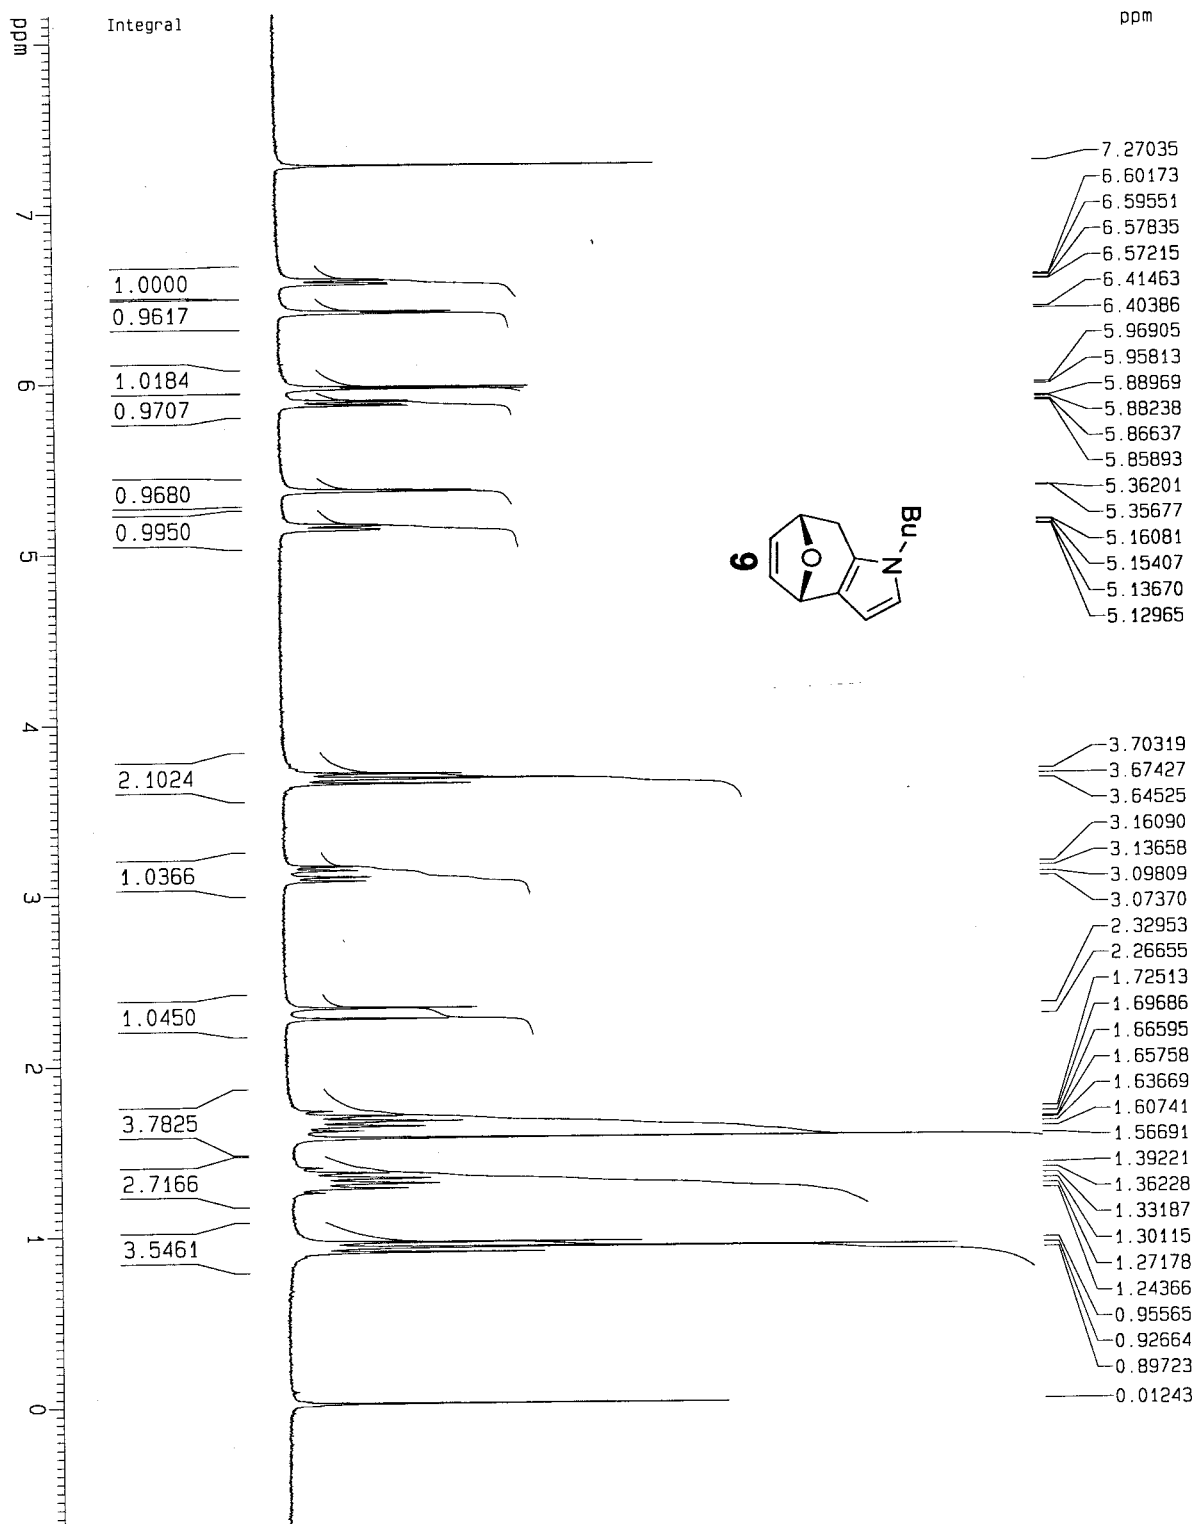

Current Data Parameters  
NAME sg-4-furan  
EXPNO 1  
PROCNO 1

F2 - Acquisition Parameters  
Date\_ 20020713  
Time 13.50  
INSTRUM apx250  
PROBHD 5 mm QNP 1H  
PULPROG zg30  
TD 32768  
SOLVENT CDCl3  
NS 16  
DS 2  
SWH 5208.333 Hz  
FIDRES 0.158946 Hz  
AQ 3.1457779 sec  
RG 4096  
DW 96.000 use  
DE 137.14 use  
TE 300.0 K  
D1 1.0000000 sec  
P1 8.70 use  
SFO1 250.1315321 MHz  
NUCLEUS 1H

F2 - Processing parameters  
SI 16384  
SF 250.1300049 MHz  
WDW EM  
SSB 0  
LB 0.20 Hz  
GB 0  
PC 1.50

1D NMR plot parameters  
CX 20.00 cm  
CY 9.00 cm  
F1P 8.163 ppm  
F1 2041.93 Hz  
F2P -0.694 ppm  
F2 -173.63 Hz  
PPMCM 0.44288 ppm  
HZCM 110.77803 Hz/

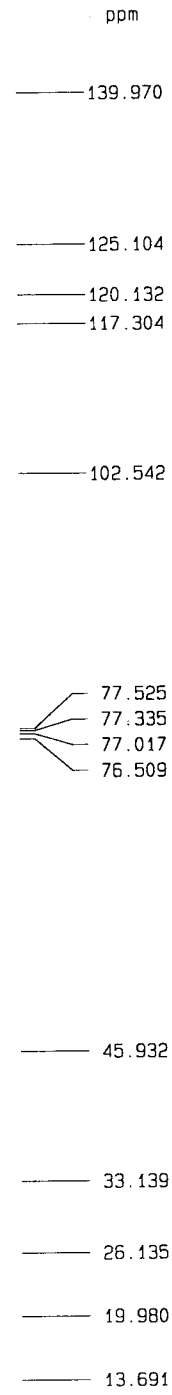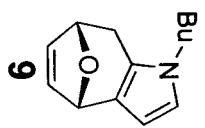

Current Data Parameters  
 NAME sg-4-furan  
 EXPNO 2  
 PROCNO 1

F2 - Acquisition Parameters  
 Date\_ 20020713  
 Time 13.55  
 INSTRUM apt250  
 PROBHD 5 mm GNP 1H  
 PULPROG zgpg30  
 TD 36864  
 SOLVENT CDCl3  
 NS 3716  
 DS 4  
 SWH 17241.379 Hz  
 FIDRES 0.467702 Hz  
 AQ 1.0691060 sec  
 RG 22800  
 DW 29.000 use  
 DE 41.43 use  
 TE 300.0 K  
 D12 0.0002000 sec  
 DL5 23.00 dB  
 CPDPRG waitz16  
 P31 103.00 use  
 D1 1.0000000 sec  
 P1 5.35 use  
 SF01 62.9023694 MHz  
 NUCLEUS 13C  
 D11 0.0300000 sec

F2 - Processing parameters  
 SI 32768  
 SF 62.8952392 MHz  
 WDW EM  
 SSB 0  
 LB 1.00 Hz  
 GB 0  
 PC 1.40

1D NMR plot parameters  
 CX 20.00 cm  
 CY 10.00 cm  
 F1P 148.694 ppm  
 F1 9352.17 Hz  
 F2P 0.474 ppm  
 F2 29.80 Hz  
 PPMCM 7.41103 ppm  
 HZCM 466.11865 Hz/

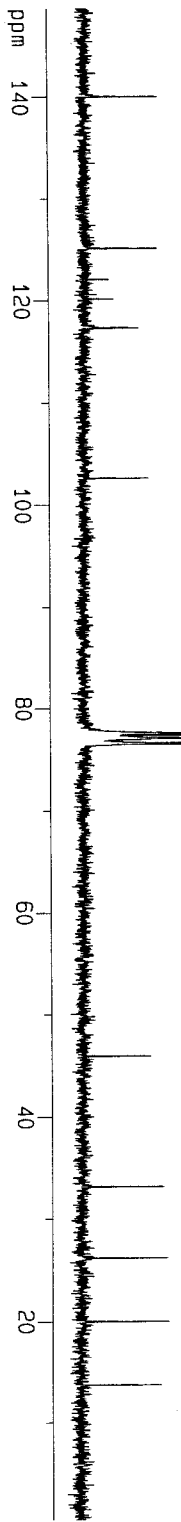

Current Data Parameters  
NAME sg-4-43-1  
EXPNO 1  
PROCNO 1

F2 - Acquisition Parameters  
Date\_ 20020603  
Time 15.22  
INSTRUM arx250  
PROBHD 5 mm QNP 1H  
PULPROG zg30  
TD 32768  
SOLVENT CDCl3  
NS 16  
DS 2  
SMH 5208.333 Hz  
FIDRES 0.158946 Hz  
AQ 3.145779 sec  
RG 2860  
DM 96.000 use  
DE 137.14 use  
TE 300.0 K  
D1 1.0000000 sec  
P1 8.70 use  
SF01 250.1315321 MHz  
NUCLEUS 1H

F2 - Processing parameters  
SI 16384  
SF 250.1300056 MHz  
WDW EM  
SSB 0  
LB 0.20 Hz  
GB 0  
PC 1.50

1D NMR plot parameters  
CX 20.00 cm  
CY 12.50 cm  
F1P 10.792 ppm  
F1 2699.42 Hz  
F2P -0.838 ppm  
F2 -209.60 Hz  
PPMQM 0.58150 ppm  
HZCM 145.45097 Hz/

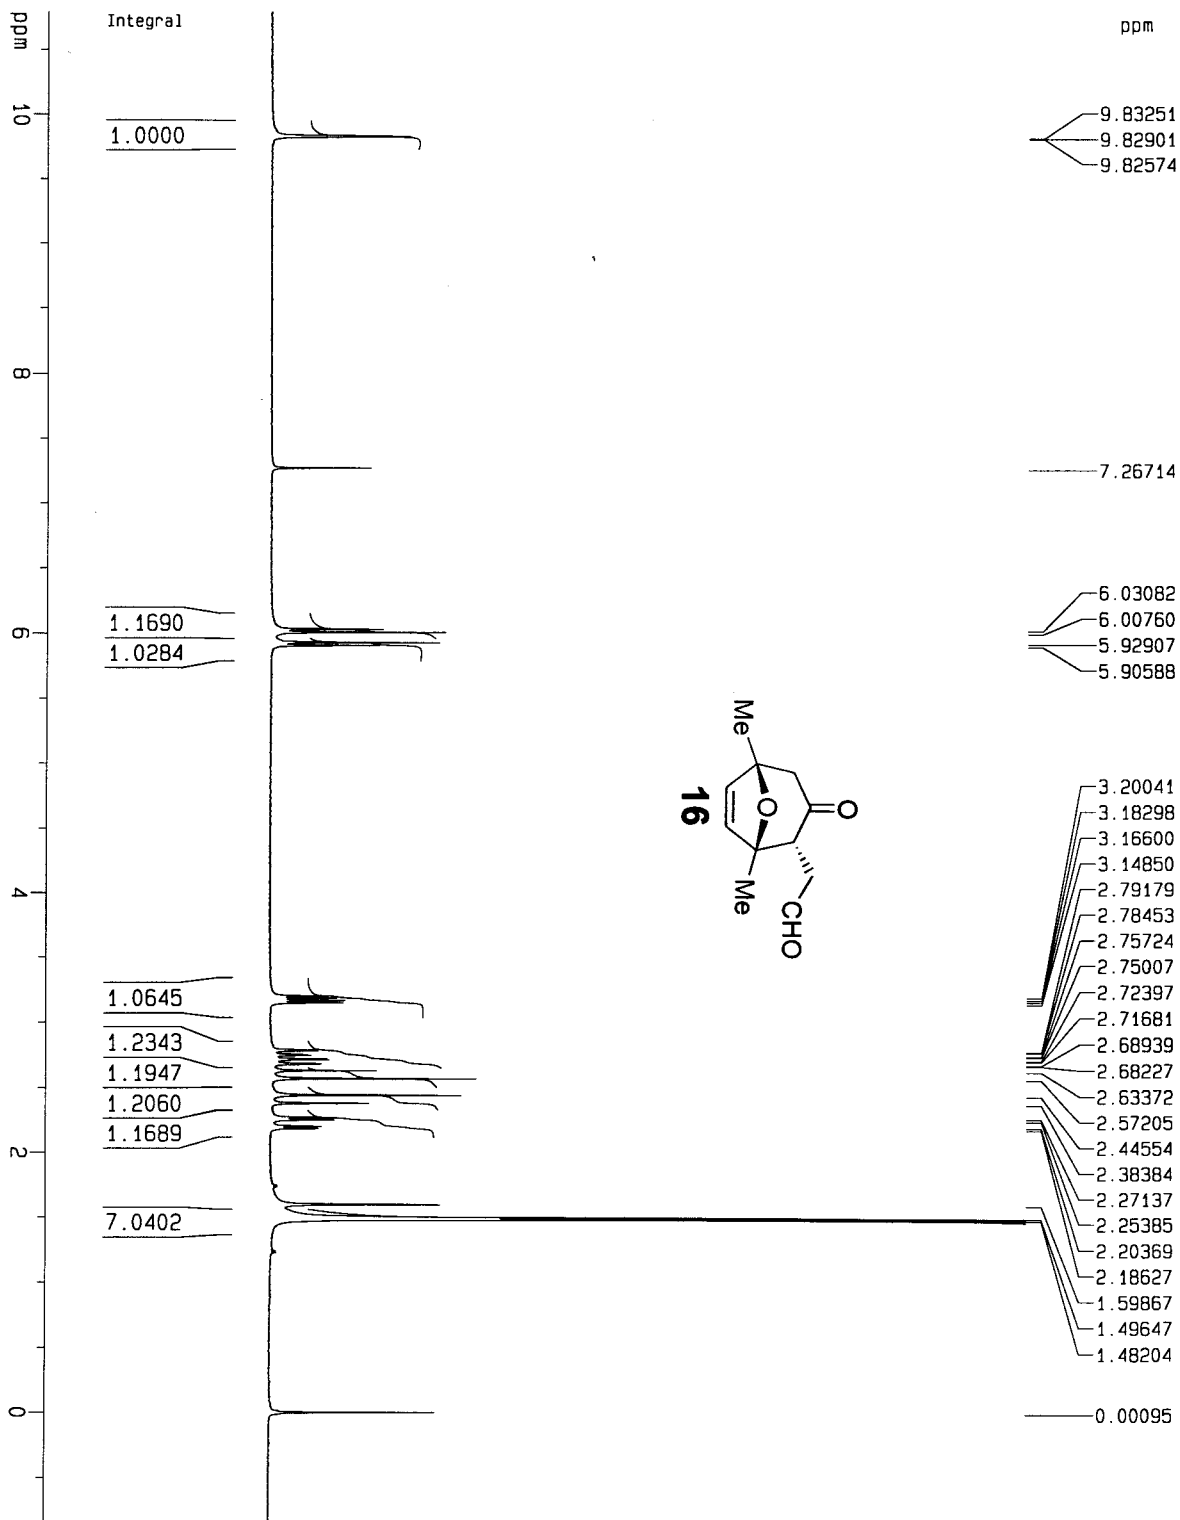

206.257  
199.810

138.004  
134.289

86.582  
84.280  
77.260  
77.006  
76.751

55.688  
50.711

39.436

23.201  
21.832

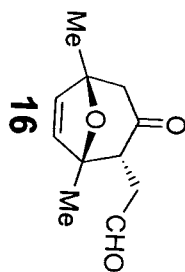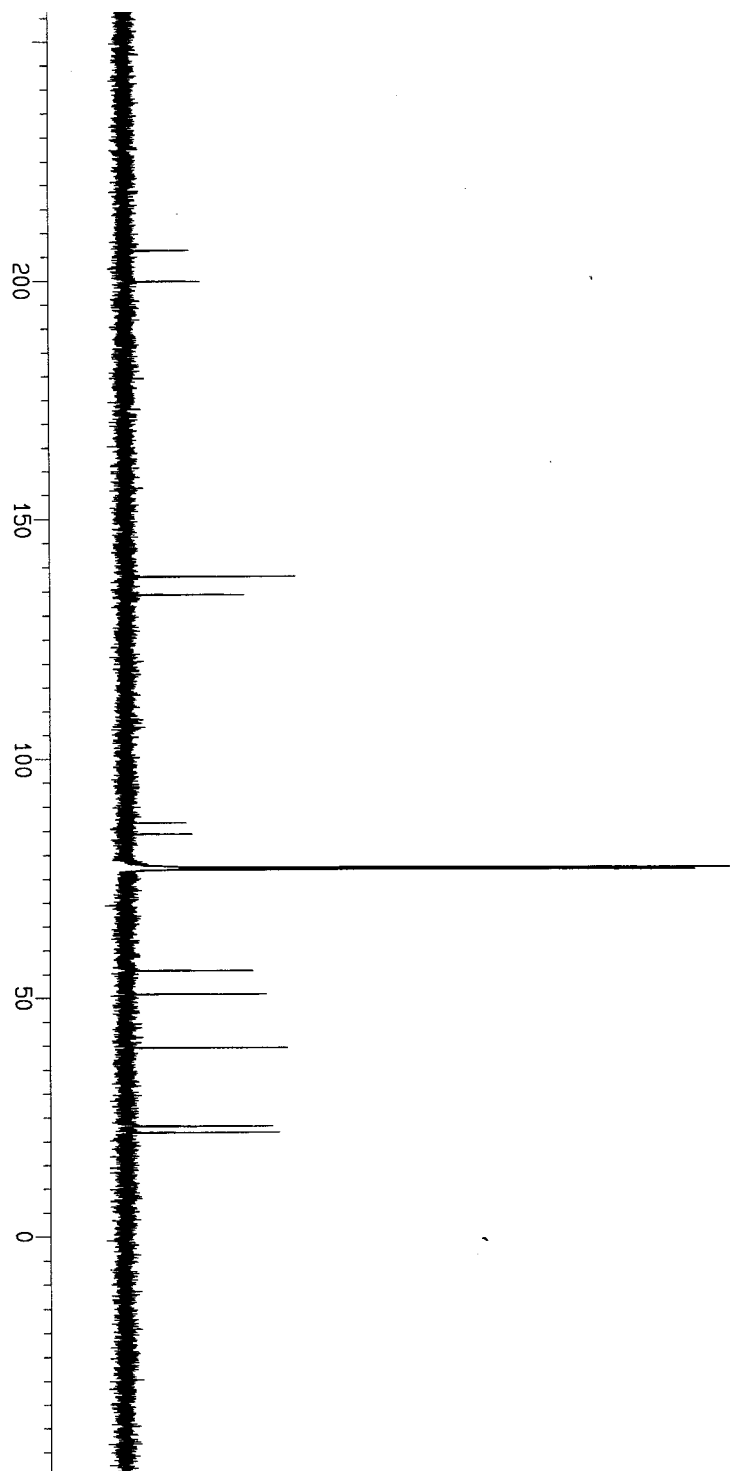

Current Data Parameters  
NAME sg-4-43  
EXPNO 2  
PROCNO 1

F2 - Acquisition Parameters  
Date\_ 20020603  
Time 17.45  
INSTRUM DRX500  
PROBHD 5 mm Multinucl  
PULPROG zgpg30  
TO 65536  
SOLVENT CDCl3  
NS 450  
DS 4  
SWH 39681.812 Hz  
FIDRES 0.605496 Hz  
AQ 0.8258188 sec  
RG 16384  
DM 12.600 usec  
DE 6.00 usec  
TE 298.0 K  
D1 1.00000000 sec  
d11 0.03000000 sec

===== CHANNEL f1 =====  
NUC1 13C  
P1 8.24 usec  
PL1 3.00 dB  
SFO1 125.7713108 MHz

===== CHANNEL f2 =====  
CPDPRG2 waltz16  
NUC2 1H  
PCPD2 107.00 usec  
PL2 0.00 dB  
PL12 21.00 dB  
SFO2 500.1320005 MHz

F2 - Processing parameters  
SI 32768  
SF 125.7577923 MHz  
WDW EM  
SSB 0  
LB 1.00 Hz  
GB 0  
PC 1.40

1D NMR plot parameters  
CX 20.00 cm  
CY 8.00 cm  
F1P 266.058 ppm  
F1 33458.86 Hz  
F2P -49.484 ppm  
F2 -6222.98 Hz  
PPMCM 15.77709 ppm/cm  
HZCM 1984.09204 Hz/cm



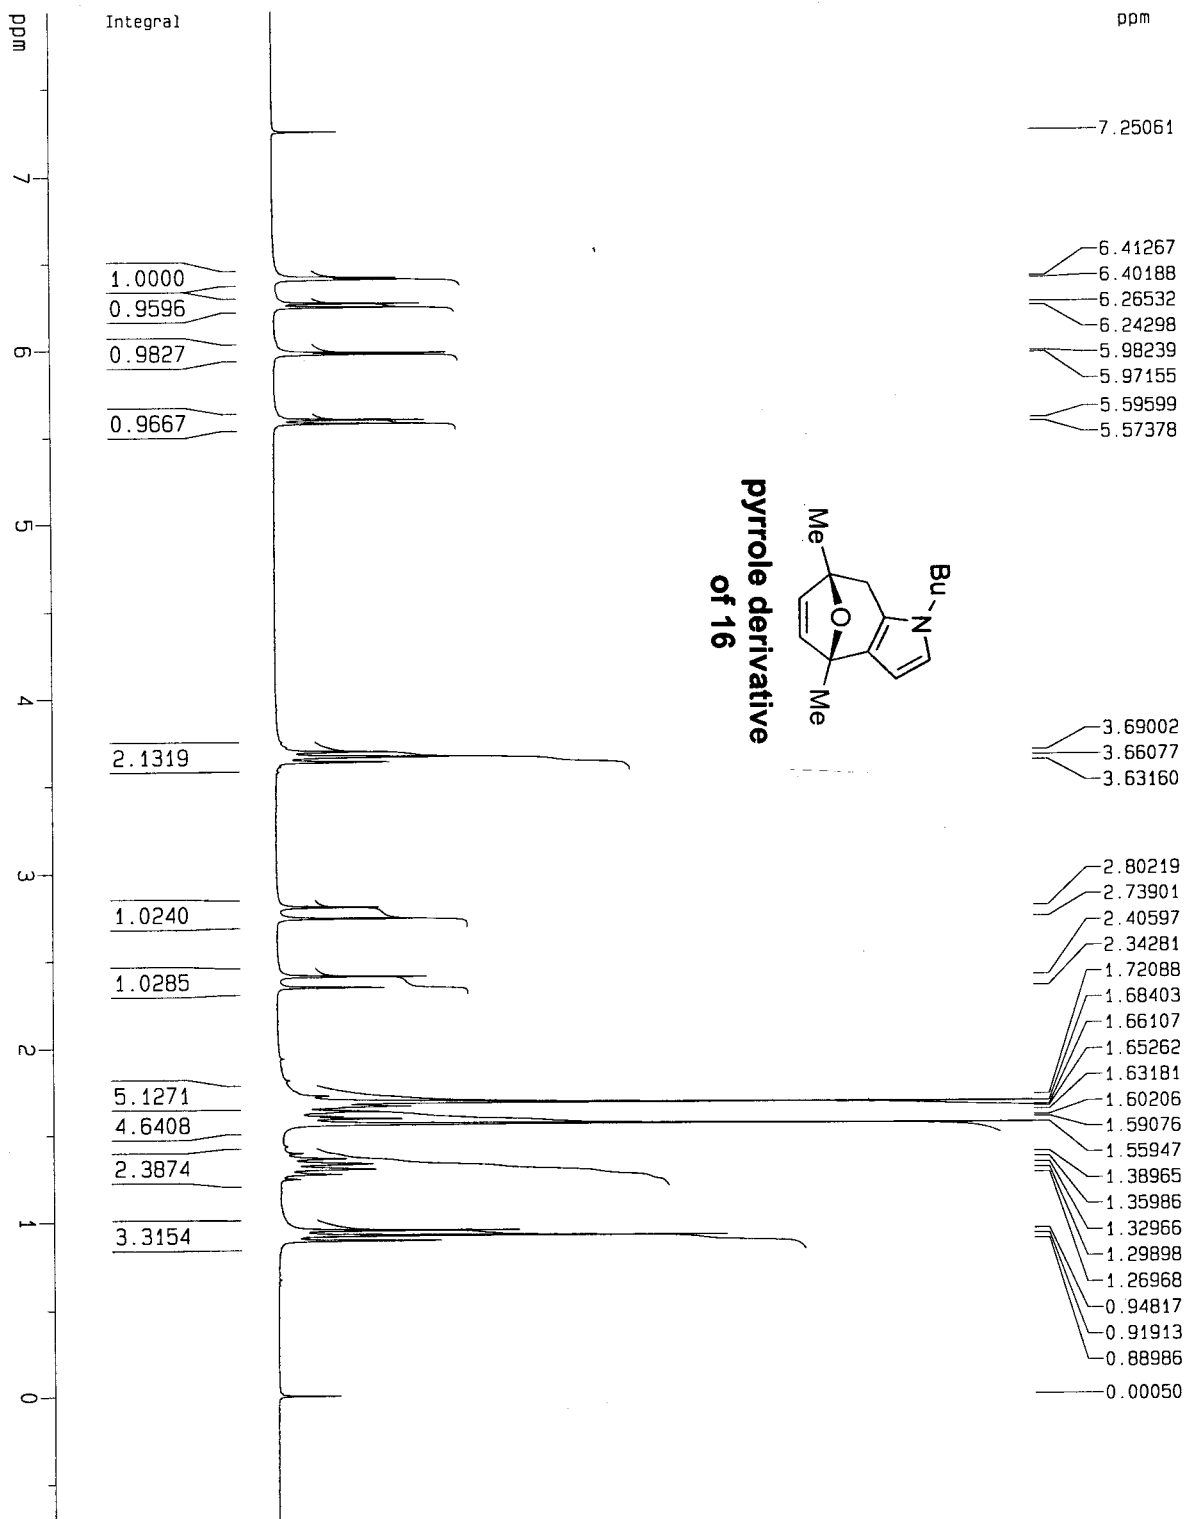

Current Data Parameters

NAME sg-4-51

EXPNO 1

PROCNO 1

F2 - Acquisition Parameters

Date\_ 20020629

Time 12.19

INSTRUM arx250

PROBHD 5 mm GNP 1H

PULPROG zg30

TD 32768

SOLVENT CDCl3

NS 16

DS 2

SMH 5208.333 Hz

FIDRES 0.158946 Hz

AQ 3.1457779 sec

RG 1024

DW 96.000 use

DE 137.14 use

TE 300.0 K

D1 1.0000000 sec

P1 8.70 use

SF01 250.1315321 MHz

NUCLEUS 1H

F2 - Processing parameters

SI 16384

SF 250.1300097 MHz

MDW EM

SSB 0

LB 0.20 Hz

GB 0

PC 1.50

1D NMR plot parameters

CX 20.00 cm

CY 12.50 cm

F1P 7.943 ppm

F1 1986.69 Hz

F2P -0.713 ppm

F2 -178.40 Hz

PPMCM 0.43279 ppm

HZCM 108.25461 Hz/

Current Data Parameters  
 NAME sg-4-51  
 EXPNO 2  
 PROCNO 1

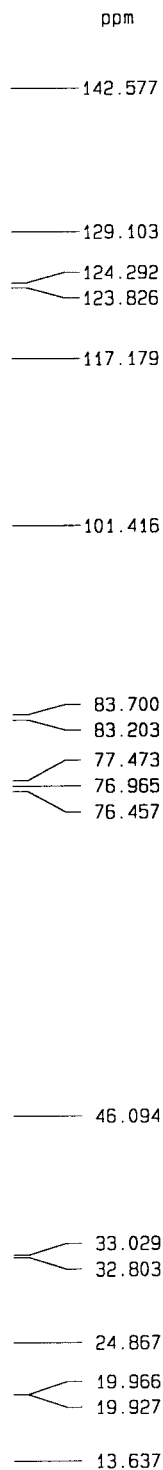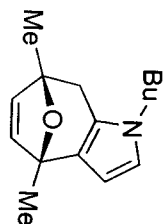

pyrrole derivative  
of 16

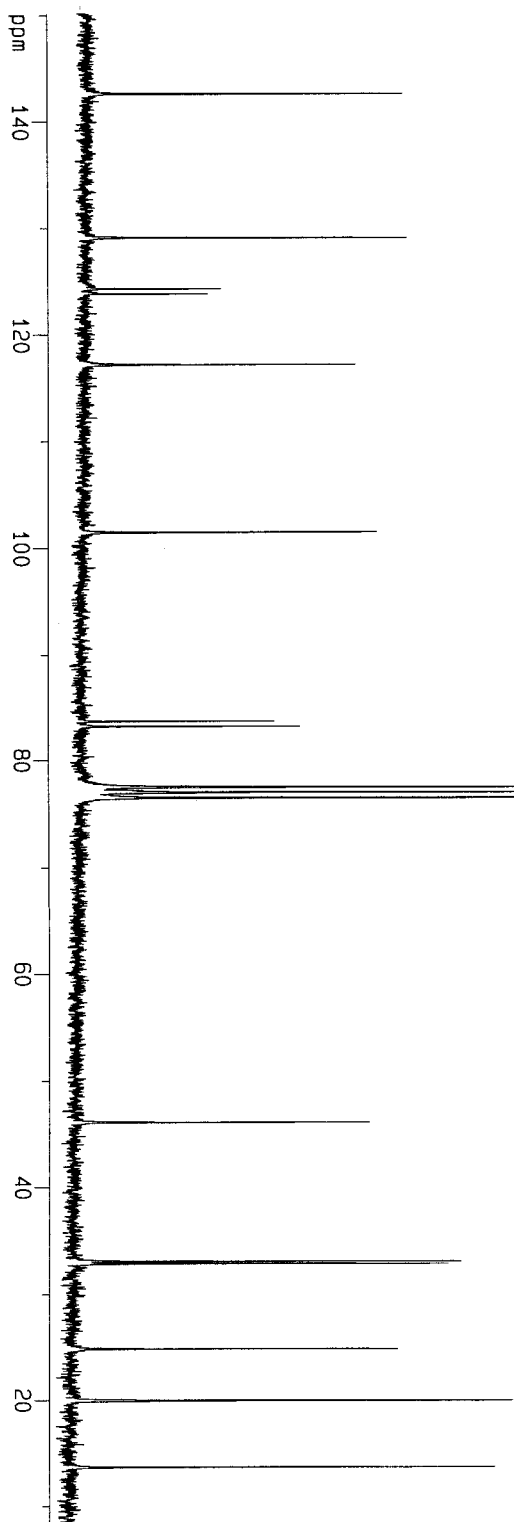

F2 - Acquisition Parameters  
 Date\_ 20020629  
 Time 14.43  
 INSTRUM brx250  
 PROBD 5 mm GNP 1H  
 PULPROG zgpg30  
 TD 36864  
 SOLVENT CDCl3  
 NS 4123  
 DS 4  
 SMH 17241.379 Hz  
 FIDRES 0.467702 Hz  
 AQ 1.0691060 sec  
 RG 22800  
 DW 29.000 use  
 DE 41.43 use  
 TE 300.0 K  
 D12 0.0002000 sec  
 DL5 23.00 dB  
 CPDPRG waliz16  
 P31 103.00 use  
 D1 1.0000000 sec  
 P1 5.35 use  
 SF01 62.9023694 MHz  
 NUCLEUS 13C  
 D11 0.0300000 sec

F2 - Processing parameters  
 SI 32768  
 SF 62.8952440 MHz  
 MDW EM  
 SSB 0  
 LB 1.00 Hz  
 GB 0  
 PC 1.40

1D NMR plot parameters  
 CX 20.00 cm  
 CY 10.00 cm  
 F1P 150.212 ppm  
 F1 9447.60 Hz  
 F2P 8.366 ppm  
 F2 526.19 Hz  
 PPMCM 7.09228 ppm  
 HZCM 446.07059 Hz/

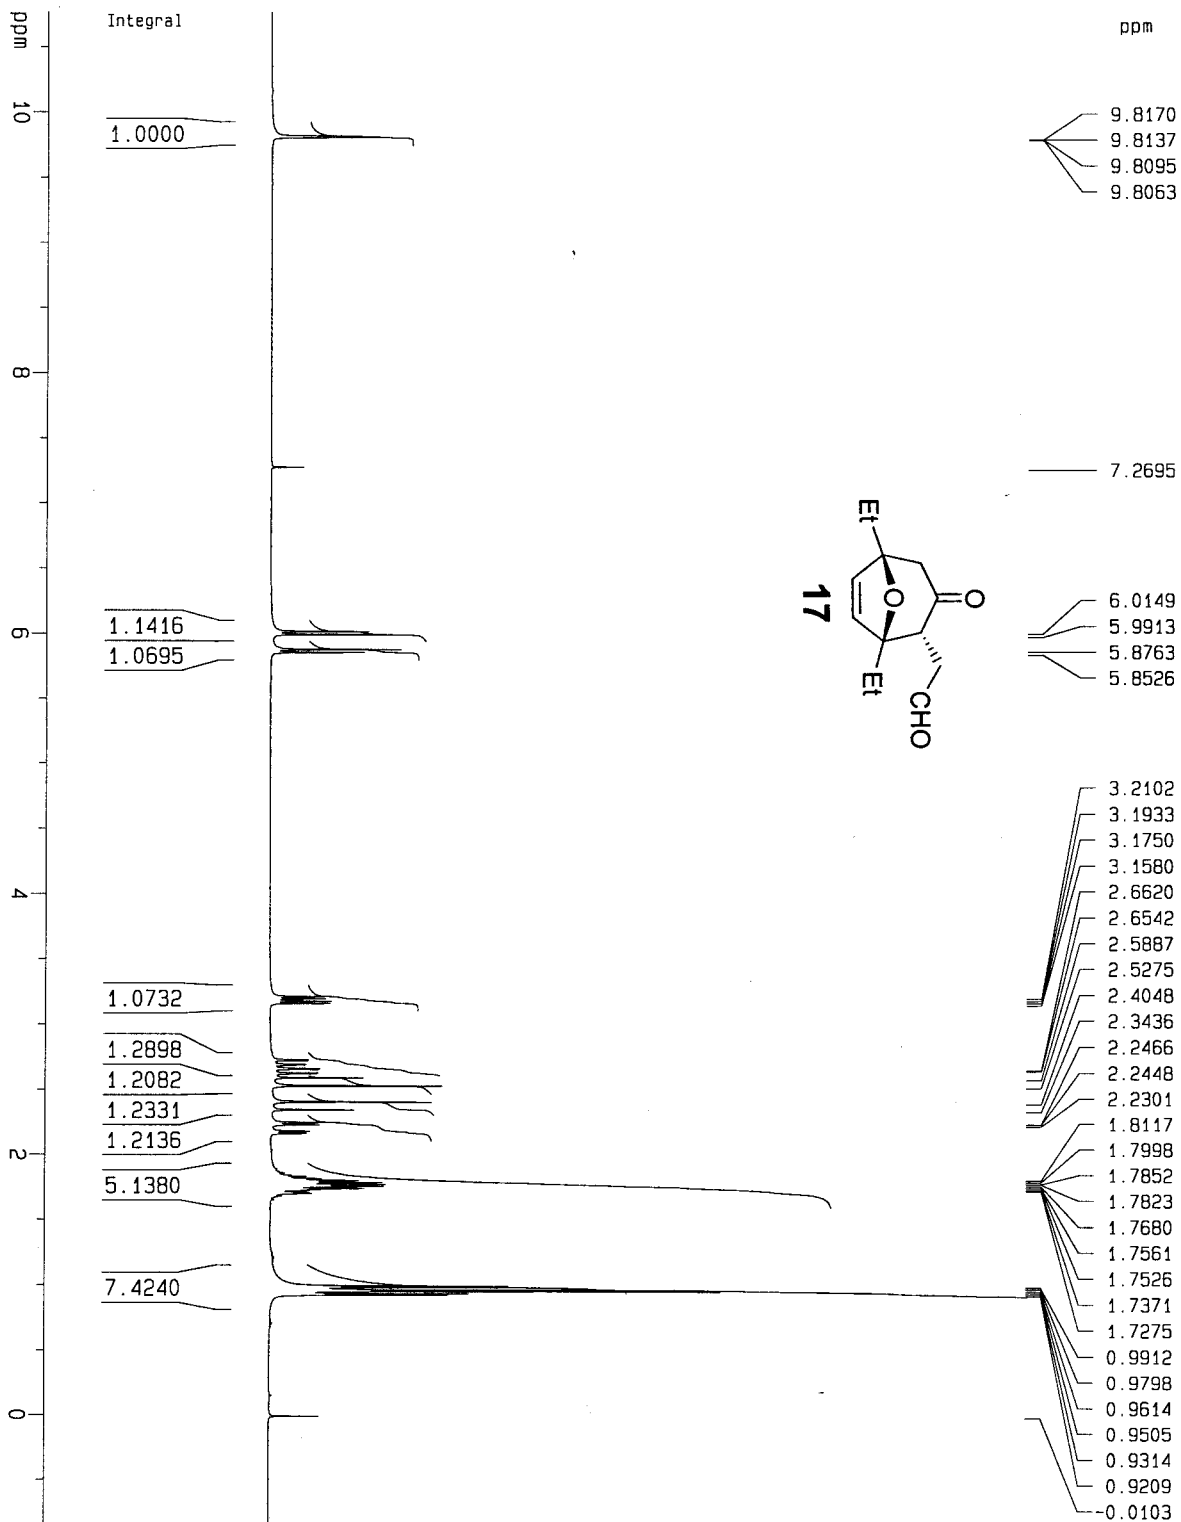

Current Data Parameters  
NAME sg-4-103-1  
EXPNO 1  
PROCNO 1

F2 - Acquisition Parameters  
Date\_ 20020623  
Time 17.49  
INSTRUM arx250  
PROBHD 5 mm QNP 1H  
PULPROG zg30  
TD 32768  
SOLVENT CDCl3  
NS 16  
DS 2  
SWH 5208.333 Hz  
FIDRES 0.158946 Hz  
AQ 3.1457779 sec  
RG 715  
DM 96.000 use  
DE 137.14 use  
TE 300.0 K  
D1 1.00000000 sec  
P1 8.70 use  
SF01 250.1315321 MHz  
NUCLEUS 1H

F2 - Processing parameters  
SI 16384  
SF 250.1300049 MHz  
WDW EM  
SSB 0  
LB 0.20 Hz  
GB 0  
PC 1.50

1D NMR plot parameters  
CX 20.00 cm  
CY 6.00 cm  
F1P 10.775 ppm  
F1 2695.05 Hz  
F2P -0.829 ppm  
F2 -207.30 Hz  
PPMCM 0.58017 ppm  
HZCM 145.11768 Hz/

ppm

206.952

199.930

136.944

133.630

89.322

87.347

77.510

77.002

76.493

54.850

49.550

39.169

29.209

27.064

8.051

7.774

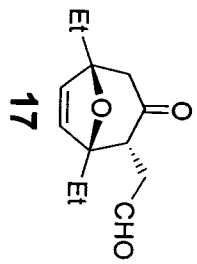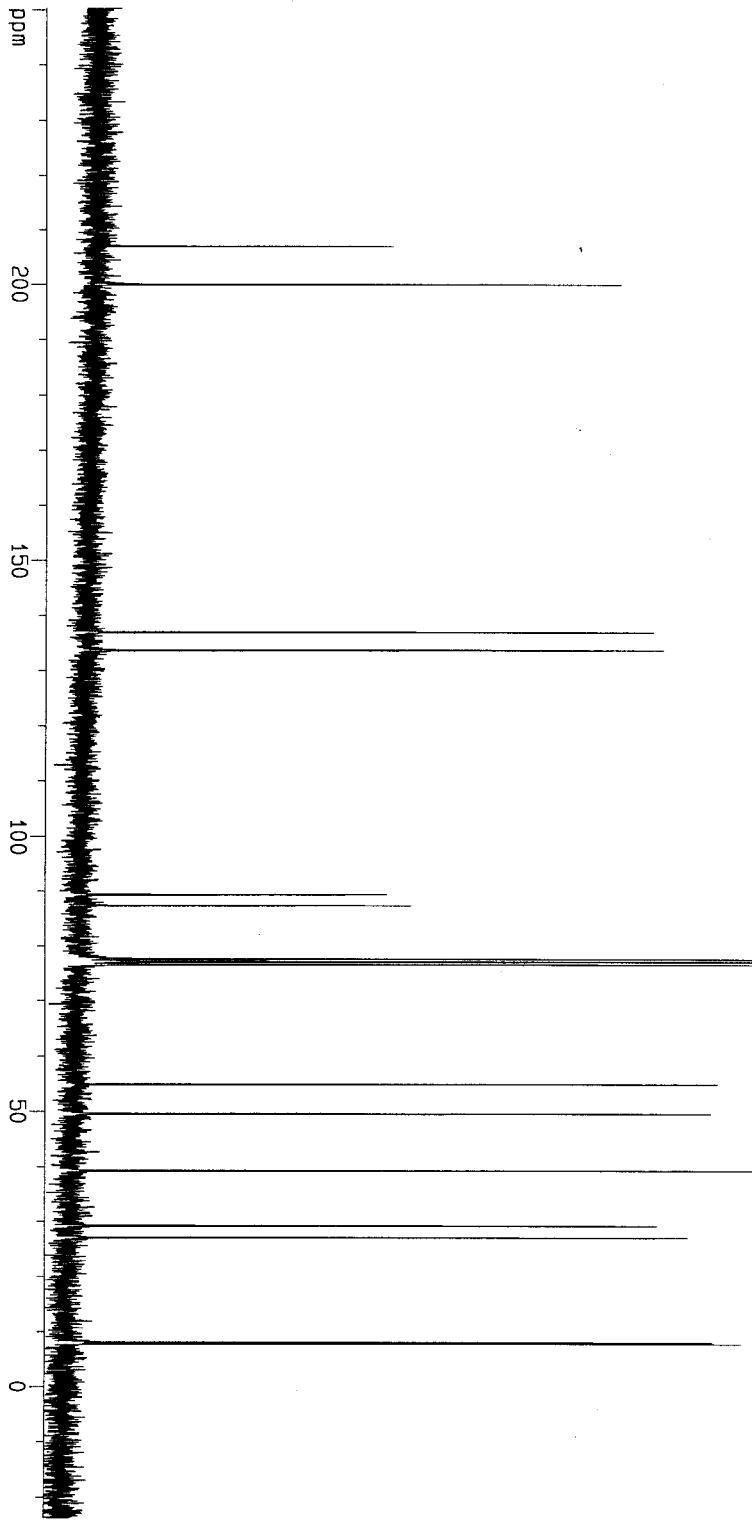

Current Data Parameters

NAME sg-4-103-1

EXPNO 3

PROCNO 1

F2 - Acquisition Parameters

Date\_ 20020623

Time 18.03

INSTRUM arx250

PROBHD 5 mm QNP 1H

PULPROG zgpg30

TD 36864

SOLVENT CDCl3

NS 1238

DS 4

SMH 17241.379 Hz

FIDRES 0.467702 Hz

AQ 1.0691060 sec

RG 22800

DW 29.000 use

DE 41.43 use

TE 300.0 K

D12 0.0002000 sec

DL5 23.00 dB

CPDPRG waltz16

P31 103.00 use

D1 1.0000000 sec

P1 5.35 use

SFO1 62.9023694 MHz

NUCLEUS 13C

D11 0.0300000 sec

F2 - Processing parameters

SI 32768

SF 62.8952419 MHz

WDW EM

SSB 0

LB 1.00 Hz

GB 0

PC 1.40

1D NMR plot parameters

CX 20.00 cm

CY 10.00 cm

F1P 250.354 ppm

F1 15746.05 Hz

F2P -23.775 ppm

F2 -1495.33 Hz

PPMCM 13.70643 ppm

HZCM 862.06891 Hz

ppm

7.27084

6.41899

6.40912

6.25247

6.23000

5.97820

5.96791

5.62795

5.60534

3.70358  
3.67464  
3.64521  
2.77829  
2.71557  
2.37698  
2.31444  
2.13816  
2.10835  
2.07706  
2.04654  
1.91066  
1.88100  
1.85119  
1.82155  
1.70217  
1.67227  
1.64248  
1.57418  
1.36819  
1.33743  
1.30696  
1.27826  
1.09578  
1.07546  
1.06703  
1.04790  
1.03735  
1.01762  
0.95805  
0.92894  
0.89929  
0.01597

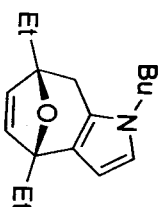

pyrrole derivative  
of 17

Integral

1.0000

0.9743

0.9738

0.9301

2.0661

0.9968

1.0991

2.4426

2.3586

2.5159

3.3503

6.9690

3.8440

Current Data Parameters  
NAME sg-4-105  
EXPNO 1  
PROCNO 1

F2 - Acquisition Parameters  
Date\_ 20020624

Time 16.46

INSTRUM arx250

PROBHD 5 mm QNP 1H

PULPROG zg30

TD 32768

SOLVENT CDCl3

NS 16

DS 2

SMH 5208.333 Hz

FIDRES 0.158946 Hz

AQ 3.1457779 sec

RG 1430

DM 96.000 use

DE 137.14 use

TE 300.0 K

D1 1.0000000 sec

P1 8.70 use

SFO1 250.1315321 MHz

NUCLEUS 1H

F2 - Processing parameters

SI 16384

SF 250.1300049 MHz

WDW EM

SSB 0

LB 0.20 Hz

GB 0

PC 1.50

1D NMR plot parameters

CX 20.00 cm

CY 6.00 cm

F1P 8.033 ppm

F1 2009.22 Hz

F2P -0.630 ppm

F2 -157.61 Hz

PPMCM 0.43314 ppm

HZCM 108.34129 Hz/

Current Data Parameters  
 NAME sg-4-105  
 EXPNO 2  
 PROCNO 1

# F2 - Acquisition Parameters

Date\_ 20020624  
 Time 15.51  
 INSTRUM arx250  
 PROBD 5 mm QNP 1H  
 PULPROG zgpg30  
 TD 36864  
 SOLVENT CDCl3  
 NS 2959  
 DS 4  
 SMH 17241.379 Hz  
 FIDRES 0.467702 Hz  
 AQ 1.0691060 sec  
 RG 22800  
 DW 29.000 use  
 DE 41.43 use  
 TE 300.0 K  
 D12 0.00002000 sec  
 DL5 23.00 dB  
 CPDPRG waitz16  
 P31 103.00 use  
 D1 1.00000000 sec  
 P1 5.35 use  
 SF01 62.9023694 MHz  
 NUCLEUS 13C  
 D11 0.03000000 sec

# F2 - Processing parameters

SI 32768  
 SF 62.8952440 MHz  
 WDW EM  
 SSB 0  
 LB 1.00 Hz  
 GB 0  
 PC 1.40

# 1D NMR plot parameters

CX 20.00 cm  
 CY 10.00 cm  
 F1P 152.264 ppm  
 F1 9576.67 Hz  
 F2P -1.280 ppm  
 F2 -80.48 Hz  
 PPMCM 7.6717 ppm  
 HZCM 482.85727 Hz/

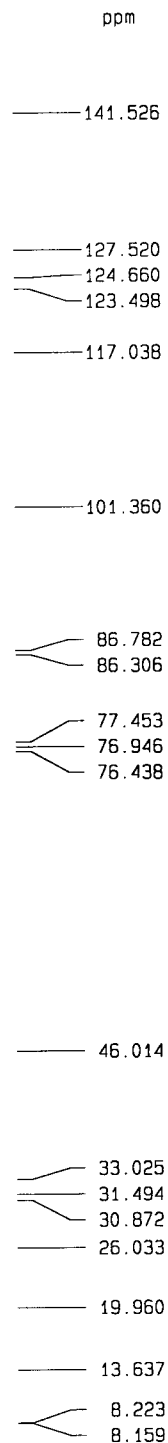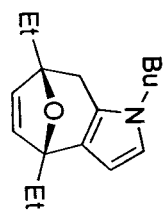

pyrrole derivative  
 of 17

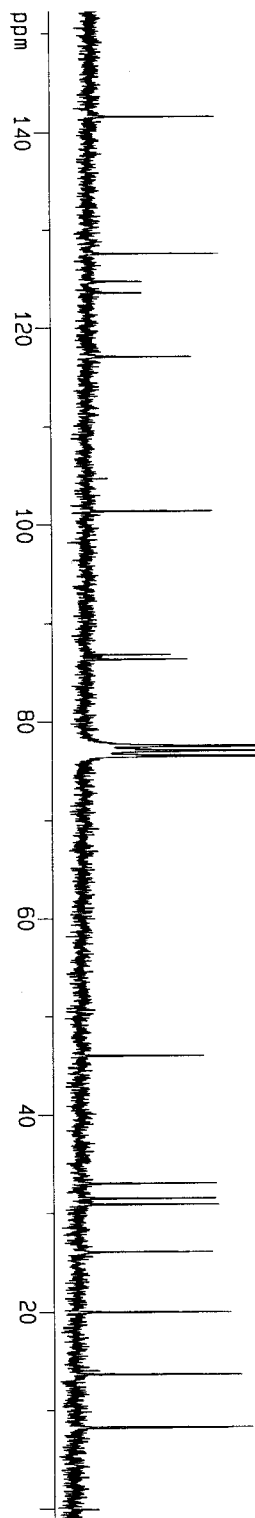

$\frac{1}{2} \rightarrow 7.27529$   
 $\frac{1}{3} \rightarrow 7.12718$

6.30060  
6.00757  
5.98796  
5.87760  
5.85799

| Crack Type | Value   |
|------------|---------|
| 1          | 3.18712 |
| 2          | 3.17144 |
| 3          | 3.15754 |
| 4          | 2.58890 |
| 5          | 2.53791 |
| 6          | 2.40055 |
| 7          | 2.34958 |
| 8          | 1.74115 |
| 9          | 1.72606 |
| 10         | 1.72054 |
| 11         | 1.70461 |
| 12         | 1.69705 |
| 13         | 1.68739 |
| 14         | 1.66988 |
| 15         | 0.98588 |
| 16         | 0.97600 |
| 17         | 0.96887 |
| 18         | 0.96148 |
| 19         | 0.95151 |
| 20         | 0.94452 |
| 21         | 0.93727 |
| 22         | 0.92033 |

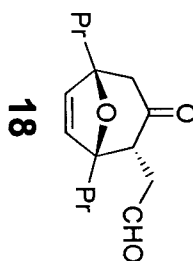

1.0018  
1.0902  
2.4436  
1.0907  
4.6816  
2.2955  
2.3338  
7.0628

| Year | Number of people in the labor force (millions) |
|------|------------------------------------------------|
| 1970 | 4.5                                            |
| 1975 | 5.5                                            |
| 1980 | 6.5                                            |
| 1985 | 7.5                                            |
| 1990 | 8.5                                            |

## F2 - Acquisition Parameters

Time 21.12

PROBHD 5 mm MULTINUCI

 TD | 32768 |

16 NS

|     |          |
|-----|----------|
| SWH | 6172.835 |
|-----|----------|

|    |           |
|----|-----------|
| AG | 2.6542580 |
|----|-----------|

|    |        |
|----|--------|
| DM | 81.000 |
| DM | 81.000 |

TE 300.0

|     |             |
|-----|-------------|
| 031 | 0.000000000 |
|-----|-------------|

===== CHANNEL #1 =====

p1 7.50  
p1 0.00

SI-01 300.1318534

F2 - Processing parameters

300.1300016

SSB 0  
ID 0 37

1  
2  
3

### 3D NMR of paracetamol

|    |       |
|----|-------|
|    | 20.00 |
| CX | 12.50 |
| CX |       |

|      |         |
|------|---------|
| HELP | 12.00   |
| LE   | 3601.50 |

|     |         |
|-----|---------|
| 121 | -0.200  |
| 122 | -150.06 |
| 123 |         |

|       |           |
|-------|-----------|
| FFMCM | 0.0230    |
| H7CM  | 187.58125 |

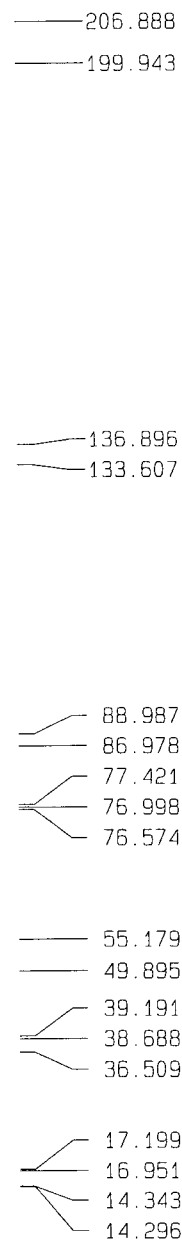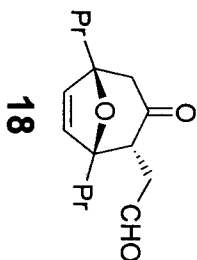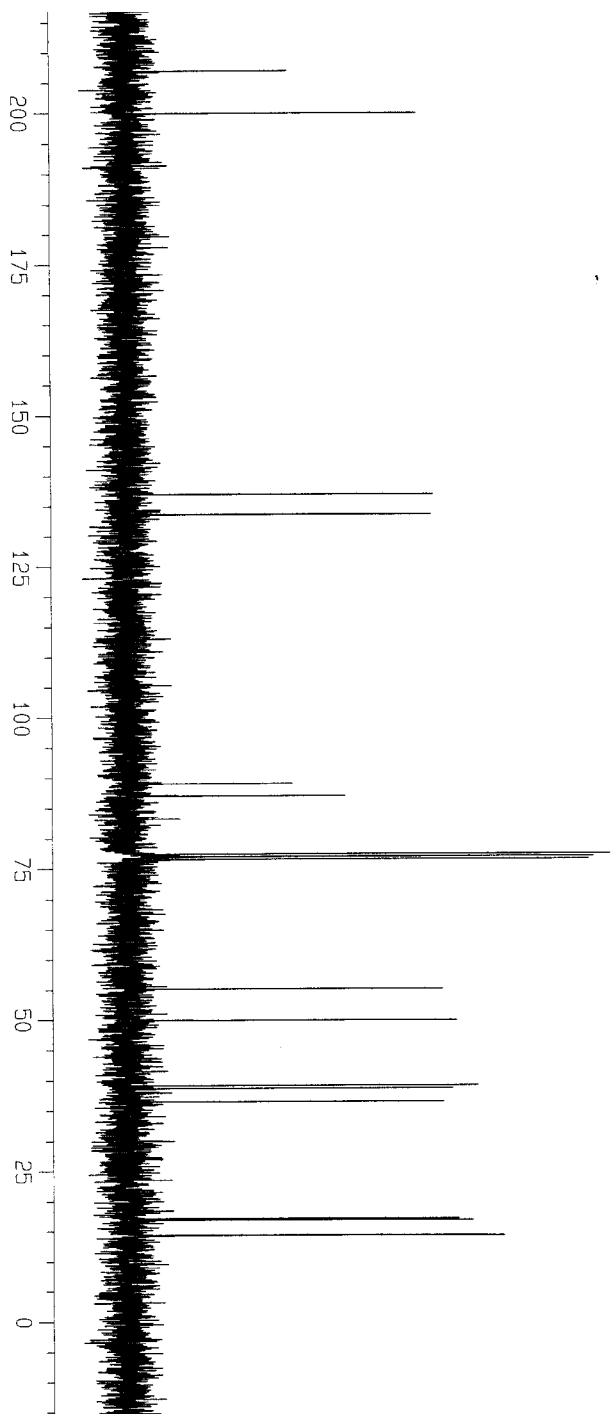

Current Data Parameters  
NAME sw-IV-110-A1  
EXPNO 2  
PROCNO 1

F2 - Acquisition Parameters  
Date\_ 20021210  
Time 21.14  
INSTRUM dpx300  
PROBHD 5 mm Multinucl  
PULPROG zgpg30  
TD 65536  
SOLVENT CDCl3  
NS 173  
DS 4  
SWH 18850.141 Hz  
FIDRES 0.287630 Hz  
AQ 1.7383924 sec  
RG 32768  
DM 26.525 usec  
DE 37.89 usec  
TE 300.0 K  
D1 1.00000000 sec  
d11 0.03000000 sec  
D31 0.00000000 sec

===== CHANNEL f1 =====  
NUC1 13C  
P1 7.75 usec  
PL1 6.00 dB  
SF01 75.4760107 MHz

===== CHANNEL f2 =====  
CPOPRG2 waltz16  
NUC2 1H  
PCPD2 100.00 usec  
PL2 120.00 dB  
PL12 24.50 dB  
SF02 300.1312005 MHz

F2 - Processing parameters  
SI 32768  
SF 75.4677514 MHz  
WDW EM  
SSB 0  
LB 1.00 Hz  
GB 0  
PC 1.40

1D NMR plot parameters  
CX 20.00 cm  
CY 5.00 cm  
F1P 234.330 ppm  
F1 17684.39 Hz  
F2P -15.447 ppm  
F2 -1165.75 Hz  
PRGM 12.48887 ppm/cm  
HZCM 942.50702 Hz/cm



ppm

Integral

ppm

10

8

6

4

2

0

pyrrole derivative  
of 18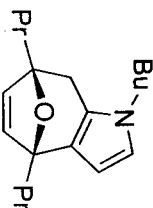

7.26993

6.41969

6.40904

6.25121

6.22858

5.97667

5.96579

5.62059

5.59794

3.70399

3.67503

3.64575

2.78196

2.71928

2.37006

2.30734

2.03311

2.00998

1.81739

1.81246

1.78229

1.70391

1.67293

1.64380

1.34028

1.30935

1.28003

1.04650

1.03068

1.01704

1.00147

0.98773

0.97237

0.96294

0.93383

0.90456

0.829

0.844

0.844

0.866

1.896

0.949

1.011

12.174

8.534

Current Data Parameters

|        |              |
|--------|--------------|
| NAME   | SW-IV-116-A1 |
| EXPNO  | 1            |
| PROCNO | 1            |

F2 - Acquisition Parameters

|         |                 |
|---------|-----------------|
| Date_   | 20021211        |
| Time    | 11.44           |
| INSTRUM | ary250          |
| PROBHD  | 5 mm QNP 1H     |
| PULPROG | zg30            |
| TD      | 32768           |
| SOLVENT | CDCl3           |
| NS      | 16              |
| DS      | 2               |
| SMH     | 5208.333 Hz     |
| FIDRES  | 0.158946 Hz     |
| AQ      | 3.1457779 sec   |
| RG      | 715             |
| DW      | 96.000 use      |
| DE      | 137.14 use      |
| TE      | 300.0 K         |
| D1      | 1.00000000 sec  |
| P1      | 8.70 use        |
| SFO1    | 250.1315321 MHz |
| NUCLEUS | 1H              |

F2 - Processing parameters

|     |                 |
|-----|-----------------|
| SI  | 16384           |
| SF  | 250.1300049 MHz |
| MDW | EM              |
| SSB | 0               |
| LB  | 0.20 Hz         |
| GB  | 0               |
| PC  | 1.50            |

1D NMR plot parameters

|       |              |
|-------|--------------|
| CX    | 20.00 cm     |
| CY    | 12.50 cm     |
| F1P   | 12.000 ppm   |
| F1    | 3001.56 Hz   |
| F2P   | -0.500 ppm   |
| F2    | -125.07 Hz   |
| PPMCM | 0.62500 ppm  |
| HZCM  | 156.33125 Hz |

ppm

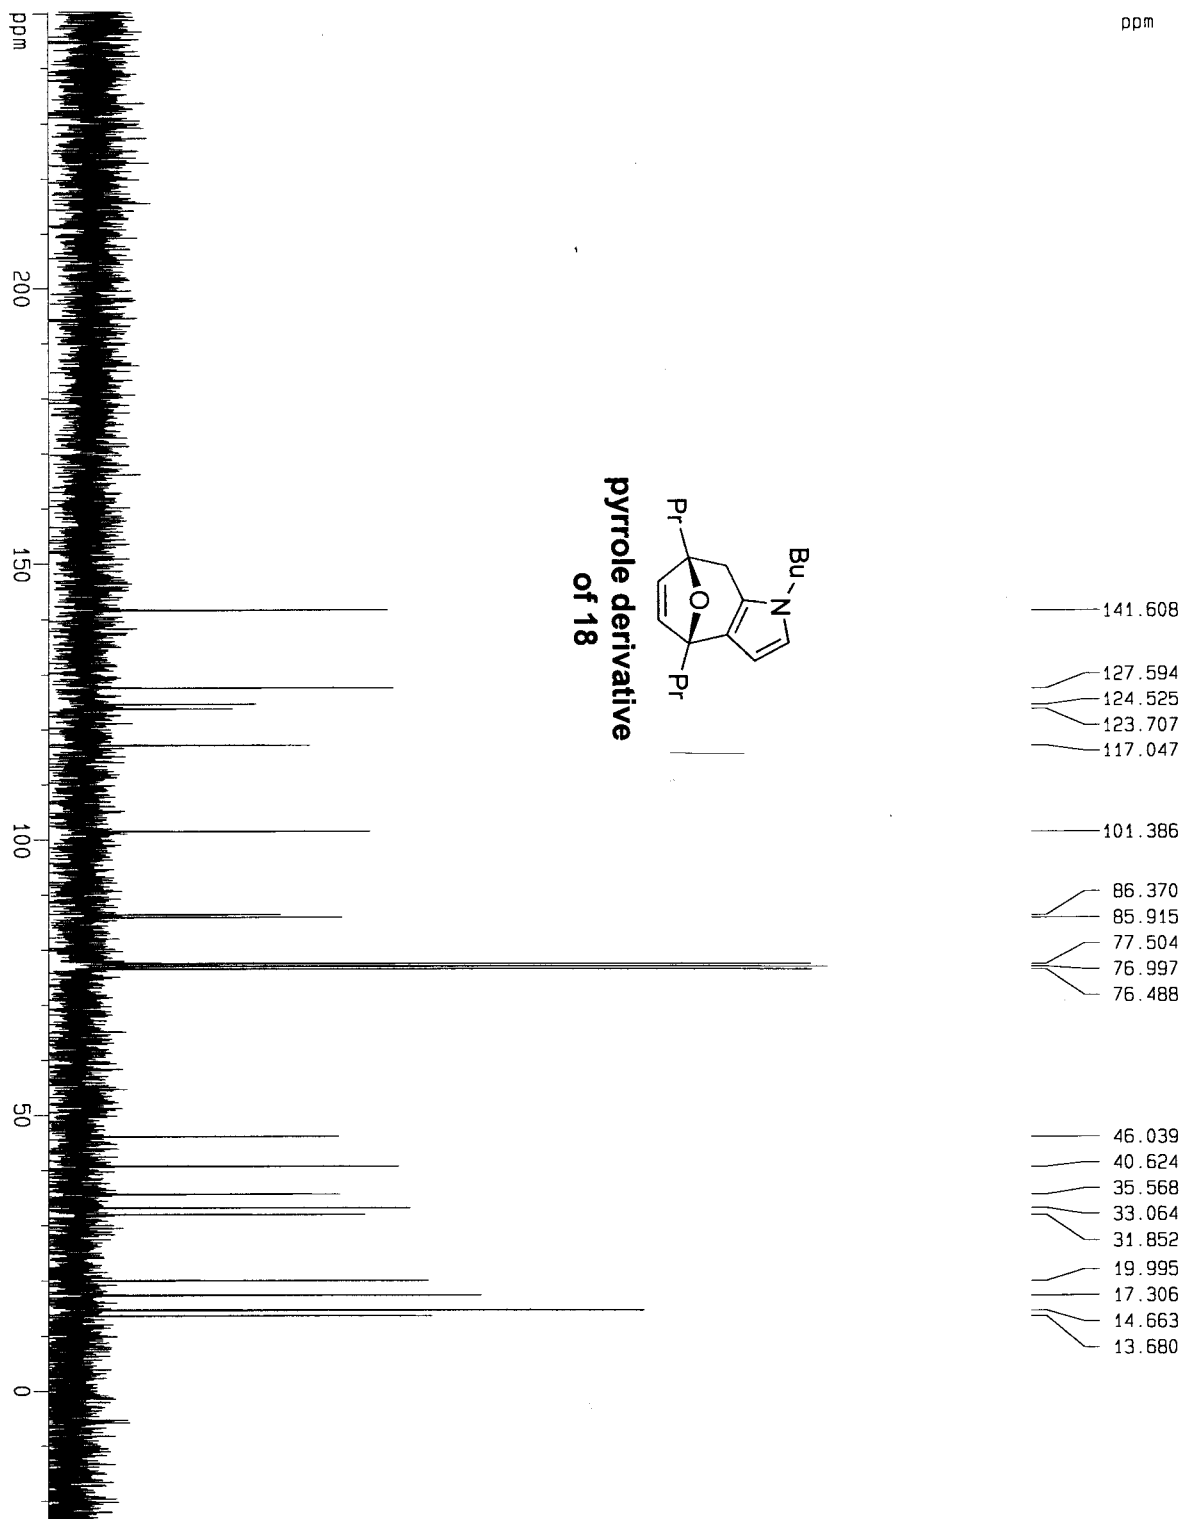

Current Data Parameters  
 NAME SW-IV-116-A1  
 EXPNO 2  
 PROCNO 1

F2 - Acquisition Parameters  
 Date\_ 20021211  
 Time 11.47

INSTRUM arx250  
 PROBD 5 mm QNP 1H  
 PULPROG zgpg30  
 TD 36864  
 SOLVENT CDCl3  
 NS 172  
 DS 4

SMH 17241.379 Hz  
 FIDRES 0.467702 Hz  
 AQ 1.0691060 sec  
 RG 22800

DW 29.000 use  
 DE 41.43 use  
 TE 300.0 K  
 D12 0.00002000 sec  
 DL5 23.00 dB  
 CPDPRG waitz16

P31 103.00 use  
 D1 1.00000000 sec  
 P1 5.35 use  
 SF01 62.9023694 MHz  
 NUCLEUS 13C

D11 0.03000000 sec  
 F2 - Processing parameters  
 SI 32768  
 SF 62.8952419 MHz  
 MDM EM  
 SSB 0  
 LB 1.00 Hz  
 GB 0  
 PC 1.40

1D NMR plot parameters  
 CX 20.00 cm  
 CY 10.00 cm  
 F1P 250.388 ppm  
 F1 15748.23 Hz  
 F2P -23.740 ppm  
 F2 -1493.14 Hz  
 PPMCM 13.70643 ppm  
 HZCM 862.06891 Hz/

Current Data Parameters  
NAME sg-4-77-1-1  
EXPNO 1  
PROCNO 1

F2 - Acquisition Parameters  
Date\_ 20020629  
Time 15.46

INSTRUM  
PROBHD 5 mm GNP 1H  
PULPROG zg30  
TD 32768  
SOLVENT CDCl3  
NS 16  
DS 2

SWH 5208.333 Hz  
FIDRES 0.158946 Hz  
AQ 3.145779 sec  
RG 1024  
DM 96.000 use  
DE 137.14 use  
TE 300.0 K  
D1 1.0000000 sec  
P1 8.70 use

SFO1 250.1315321 MHz  
NUCLEUS 1H  
F2 - Processing parameters  
SI 16384  
SF 250.1300100 MHz  
WDW EM  
SSB 0  
LB 0.20 Hz  
GB 0  
PC 1.50

1D NMR plot parameters  
CX 20.00 cm  
CY 6.00 cm  
F1P 10.258 ppm  
F1 2565.80 Hz  
F2P -0.436 ppm  
F2 -109.02 Hz  
PPMCM 0.53469 ppm  
HZCM 133.74112 Hz/

# Endo 19

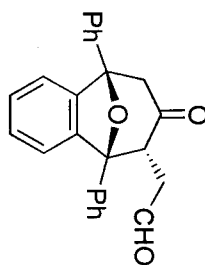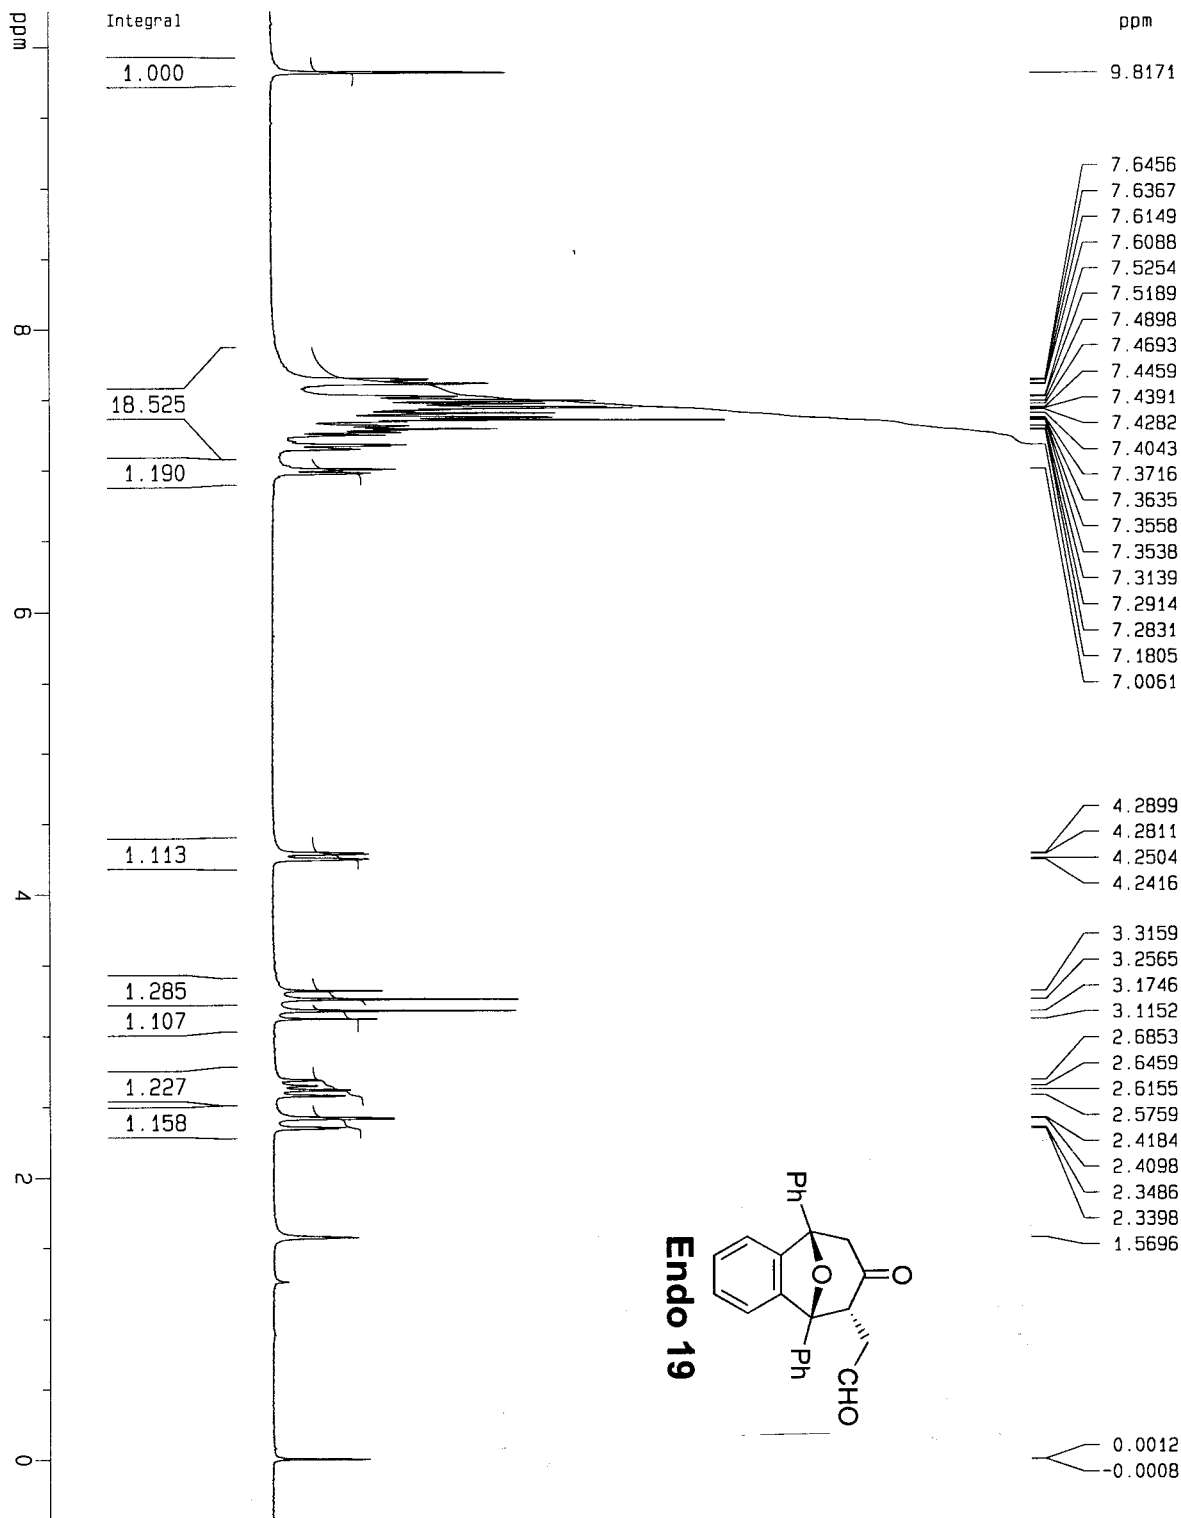

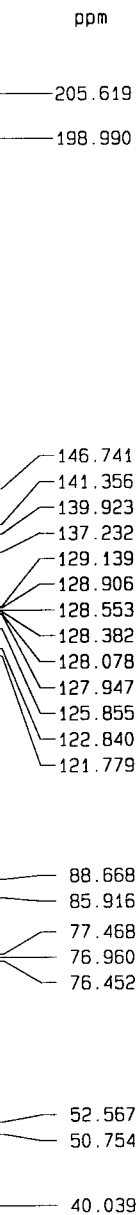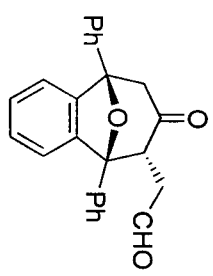

Endo 19

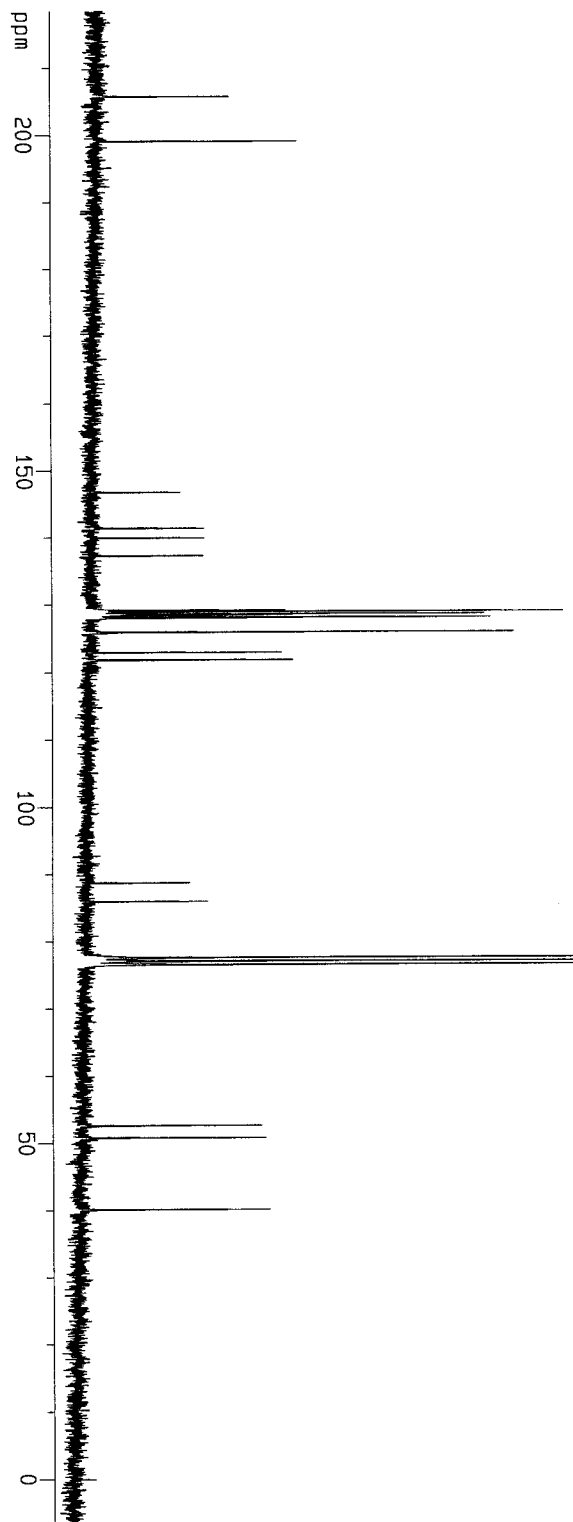

Current Data Parameters

NAME sg-4-77-1

EXPNO 2

PROCNO 1

F2 - Acquisition Parameters

Date\_ 20020628

Time 18.58

INSTRUM arx250

PROBHD 5 mm QNP 1H

PULPROG zgpg30

TD 36864

SOLVENT CDCl3

NS 3250

DS 4

SMH 17241.379 Hz

FIDRES 0.467702 Hz

AQ 1.0691060 sec

RG 22800

DW 29.000 use

DE 41.43 use

TE 300.0 K

D12 0.00002000 sec

DL5 23.00 dB

CPDPRG waitz16

P31 103.00 use

D1 1.00000000 sec

P1 5.35 use

SFO1 62.9023694 MHz

NUCLEUS 13C

D11 0.03000000 sec

F2 - Processing parameters

SI 32768

SF 62.8952440 MHz

WDW EM

SSB 0

LB 1.00 Hz

GB 0

PC 1.40

1D NMR plot parameters

CX 20.00 cm

CY 10.00 cm

F1P 218.478 ppm

F1 13741.24 Hz

F2P -6.243 ppm

F2 -392.68 Hz

PPMCM 11.23608 ppm

HZCM 706.69604 Hz/

Current Data Parameters  
 NAME sg-4-77-4-1  
 EXPNO 1  
 PROCNO 1

F2 - Acquisition Parameters  
 Date\_ 20020608  
 Time 21.29

INSTRUM arx250  
 PROBHD 5 mm QNP 1H  
 PULPROG zg30

TD 32768  
 SOLVENT CDCl3

DS 2  
 SMH 5208.333 Hz  
 FIDRES 0.158946 Hz

RG 11400  
 DW 96.000 use  
 DE 137.14 use

TE 300.0 K  
 D1 1.00000000 sec  
 P1 8.70 use

SFO1 250.1315321 MHz  
 NUCLEUS 1H

F2 - Processing parameters

SI 16384  
 SF 250.1300078 MHz

WDW EM  
 SSB 0  
 LB 0.20 Hz

GB 0  
 PC 1.50

1D NMR plot parameters

CX 20.00 cm  
 CY 12.50 cm

F1P 10.479 ppm  
 F1 2621.04 Hz

F2P -0.833 ppm  
 F2 -208.48 Hz

PPMCM 0.56561 ppm  
 HZCM 141.47635 Hz/

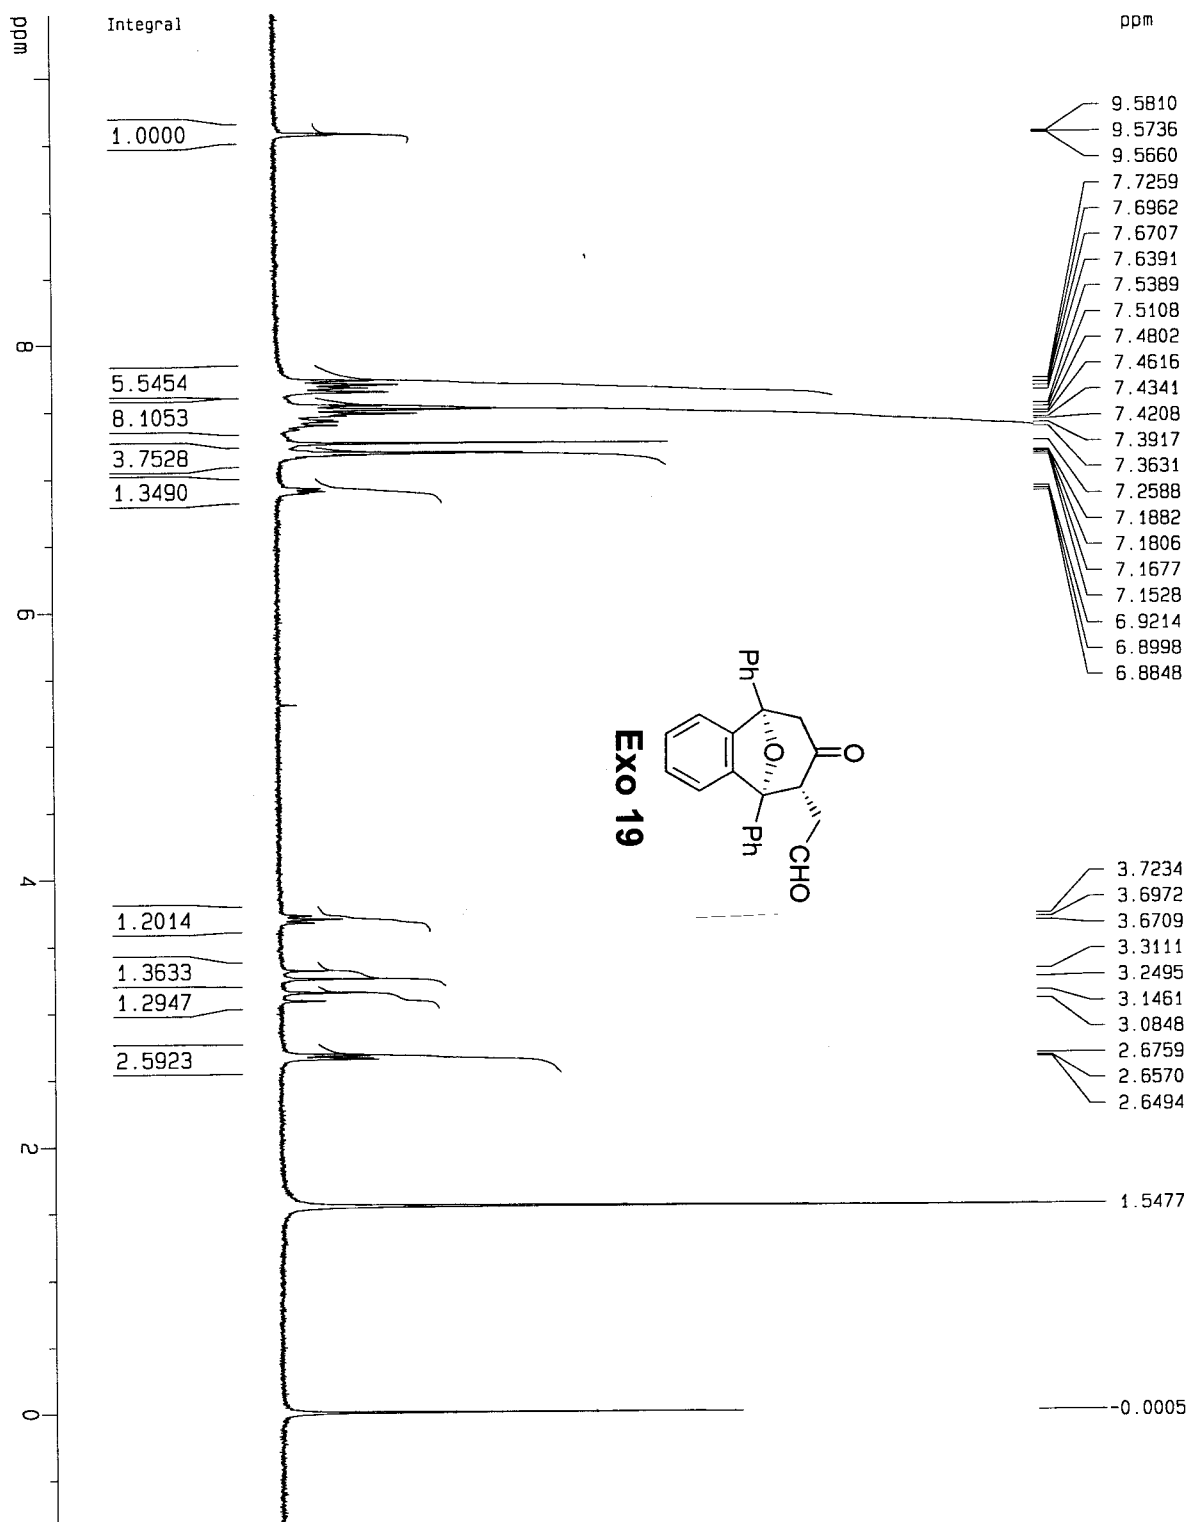

Current Data Parameters  
 NAME sg-4-77-4-2  
 EXPNO 3  
 PROCNO 1

F2 - Acquisition Parameters  
 Date\_ 20020608  
 Time 22.03

INSTRUM arx250  
 PROBD 5 mm GNP 1H  
 PULPROG zgpg30  
 TD 36864  
 SOLVENT CDCl3  
 NS 2371  
 DS 4

SWH 17241.379 Hz  
 FIDRES 0.467702 Hz  
 AQ 1.0691060 sec  
 RG 22800  
 DW 29.000 use  
 DE 41.43 use  
 TE 300.0 K

D12 0.00002000 sec  
 DL5 23.00 dB  
 CPDPRG waltz16  
 P31 103.00 use

D1 1.00000000 sec  
 P1 5.35 use  
 SF01 62.9023694 MHz  
 NUCLEUS 13C  
 D11 0.03000000 sec

F2 - Processing parameters  
 SI 32768  
 SF 62.8952408 MHz  
 WDW EM  
 SSB 0  
 LB 1.00 Hz  
 GB 0  
 PC 1.40

1D NMR plot parameters  
 CX 20.00 cm  
 CY 10.00 cm  
 F1P 235.908 ppm  
 F1 14837.48 Hz  
 F2P -2.900 ppm  
 F2 -182.42 Hz  
 PPMCM 11.94041 ppm  
 HZCM 750.99475 Hz/

ppm

206.832  
 198.761  
 144.989  
 143.598  
 140.173  
 138.647  
 129.050  
 128.758  
 128.585  
 128.518  
 128.182  
 125.875  
 124.970  
 121.321  
 121.216  
 87.319  
 85.842  
 77.510  
 77.002  
 76.494  
 53.775  
 49.150  
 42.473

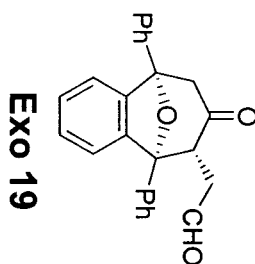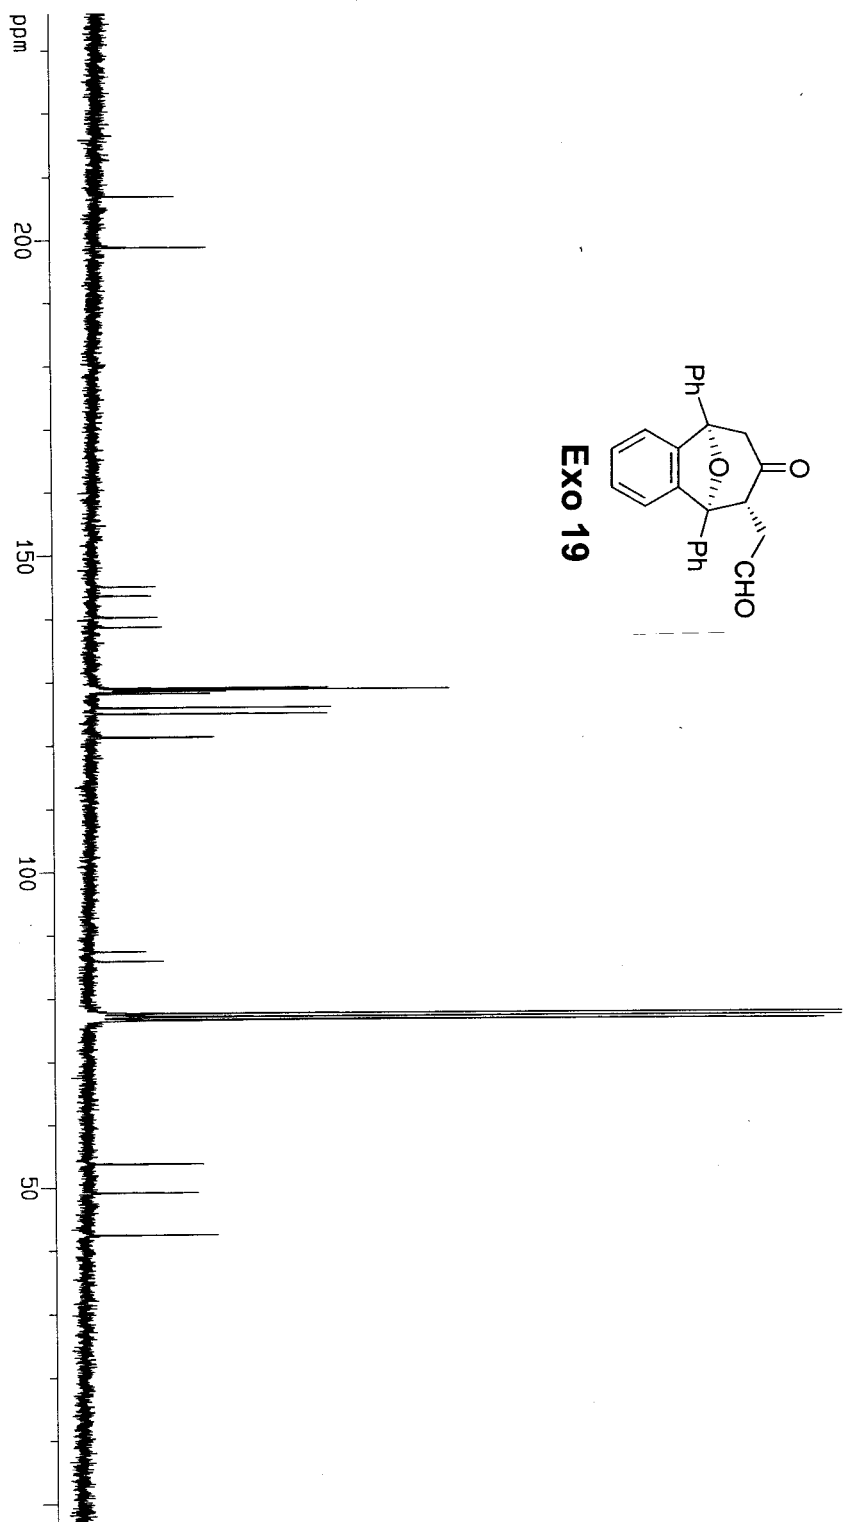

Current Data Parameters  
 NAME sg-4-78  
 EXPNO 1  
 PROCNO 1

F2 - Acquisition Parameters  
 Date\_ 20020629  
 Time 16.03  
 INSTRUM arx250  
 PROBHD 5 mm QNP 1H  
 PULPROG zg30  
 TD 32768  
 SOLVENT CDCl3  
 NS 16  
 DS 2  
 SMH 5208.333 Hz  
 FIDRES 0.158946 Hz  
 AQ 3.1457779 sec  
 RG 2048  
 DW 96.000 usec  
 DE 137.14 usec  
 TE 300.0 K  
 D1 1.00000000 sec  
 P1 8.70 usec  
 SF01 250.1315321 MHz  
 NUCLEUS 1H

F2 - Processing parameters  
 SI 16384  
 SF 250.1300110 MHz  
 MDM EM  
 SSB 0  
 LB 0.20 Hz  
 GB 0  
 PC 1.50

1D NMR plot parameters  
 CX 20.00 cm  
 CY 6.00 cm  
 F1P 9.229 ppm  
 F1 2308.42 Hz  
 F2P -0.718 ppm  
 F2 -179.67 Hz  
 PPMCM 0.49736 ppm  
 HZCM 124.40448 Hz/

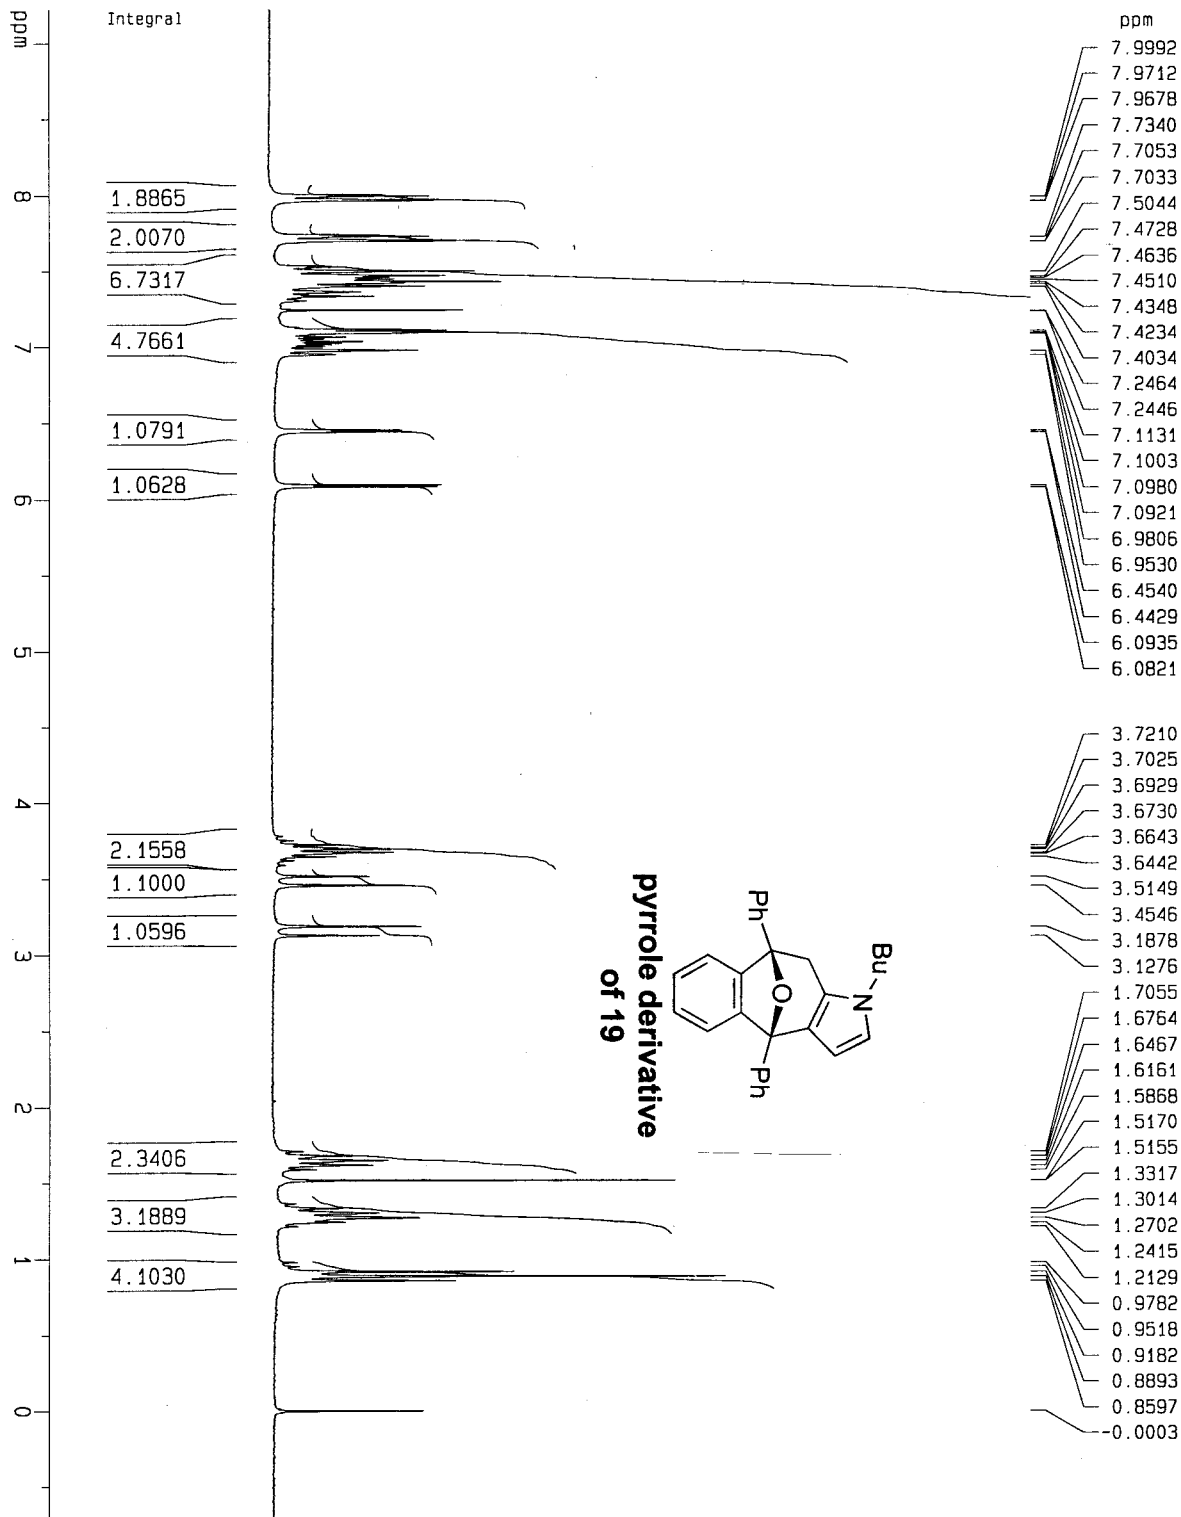

Current Data Parameters  
 NAME sg-4-78  
 EXPNO 1  
 PROCNO 1

F2 - Acquisition Parameters  
 Date\_ 20020629  
 Time 16.03  
 INSTRUM arx250  
 PROBHD 5 mm QNP 1H  
 PULPROG zg30  
 TD 32768  
 SOLVENT CDCl3  
 NS 16  
 DS 2  
 SMH 5208.333 Hz  
 FIDRES 0.158946 Hz  
 AQ 3.1457779 sec  
 RG 2048  
 DW 96.000 use  
 DE 137.14 use  
 TE 300.0 K  
 D1 1.00000000 sec  
 P1 8.70 use  
 SF01 250.1315321 MHz  
 NUCLEUS 1H

F2 - Processing parameters  
 SI 16384  
 SF 250.1300110 MHz  
 MDM EM  
 SSB 0  
 LB 0.20 Hz  
 GB 0  
 PC 1.50

1D NMR plot parameters  
 CX 20.00 cm  
 CY 6.00 cm  
 F1P 9.229 ppm  
 F1 2308.42 Hz  
 F2P -0.718 ppm  
 F2 -179.67 Hz  
 PPMCM 0.49736 ppm  
 HZCM 124.40448 Hz/





9.84117  
9.83956  
9.83743  
9.83581

7.27012

6.04908  
6.03735  
5.95782  
5.94609

3.25317  
3.24480  
3.23497  
3.22659  
2.69467  
2.69081  
2.67644  
2.67261  
2.61787  
2.60388  
2.23964  
2.23811  
2.23134  
2.22972  
2.20617  
2.20454  
2.19773  
2.19623  
1.50969  
1.46846  
1.01435  
1.00041  
0.00016

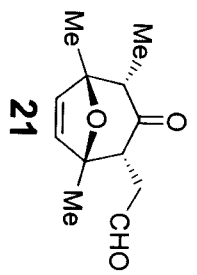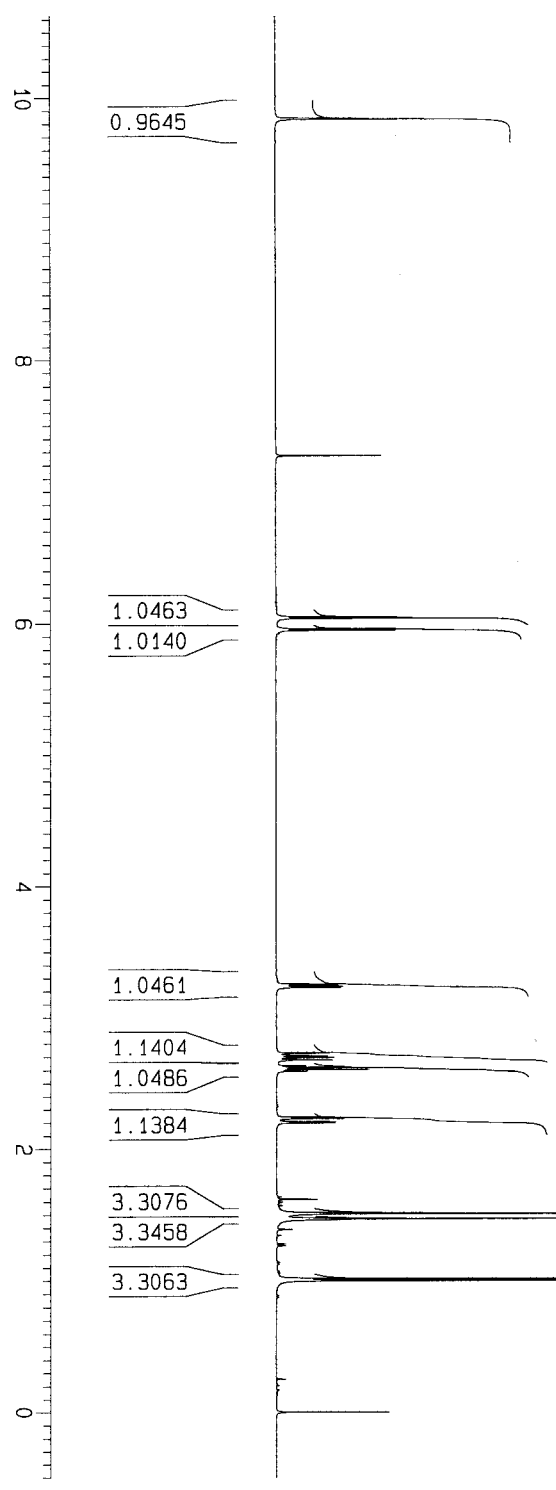

Current Data Parameters  
NAME XH-IV-4-A2  
EXPNO 1  
PROCNO 1

F2 - Acquisition Parameters  
Date\_ 20021125  
Time 23.06  
INSTRUM DRX500  
PROBHD 5 mm Multinuc1  
PULPROG zg30  
TD 45056  
SOLVENT CDC13  
NS 16  
DS 2  
SWH 10330.578 Hz  
FIDRES 0.229283 Hz  
AQ 2.1807604 sec  
RG 64  
DM 48.400 usec  
DE 6.00 usec  
TE 296.7 K  
D1 1.00000000 sec

===== CHANNEL f1 =====  
NUC1 1H  
P1 13.25 usec  
PL1 -3.00 dB  
SF01 500.1330885 MHz

F2 - Processing parameters  
SI 32768  
SF 500.1300084 MHz  
WDW EM  
SSB 0  
LB 0.20 Hz  
GB 0  
PC 1.40

1D NMR plot parameters  
CX 20.00 cm  
CY 12.50 cm  
F1P 11.000 ppm  
F1 5501.43 Hz  
F2P -0.500 ppm  
F2 -250.07 Hz  
PPMCM 0.57500 ppm/cr  
HZCM 287.57477 Hz/cm

207.672  
199.987  
136.683  
135.586  
87.764  
86.706  
77.251  
76.998  
76.743  
55.807  
54.580  
39.676  
21.958  
21.755  
10.074

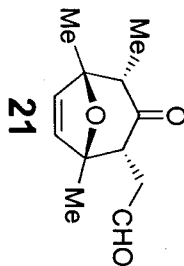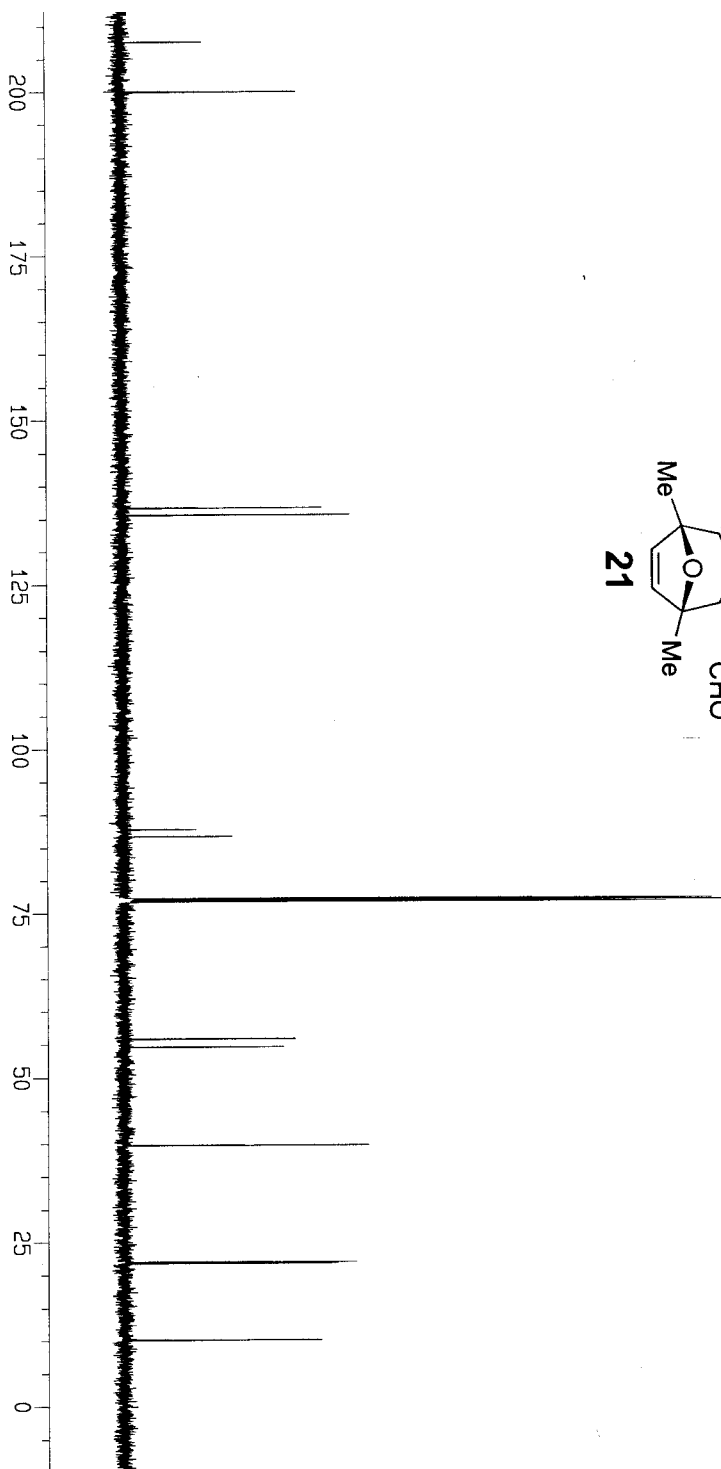

Current Data Parameters  
NAME XH-IV-4-A2  
EXPNO 2  
PROCNO 1

F2 - Acquisition Parameters  
Date\_ 20021125  
Time 23.08

INSTRUM DRX500  
PROBHD 5 mm Multinuc1  
PULPROG zgpg30  
TD 65536  
SOLVENT CDCl3  
NS 150  
DS 4  
SWH 39681.812 Hz  
FIDRES 0.605496 Hz  
AQ 0.8258188 sec  
RG 16384  
DE 12.600 usec  
TE 298.0 K  
D1 1.00000000 sec  
d11 0.03000000 sec

===== CHANNEL f1 =====  
NUC1 13C  
P1 7.90 usec  
PL1 3.00 dB  
SFO1 125.7713108 MHz

===== CHANNEL f2 =====  
CPDPRG2 waltz16  
NUC2 1H  
PCPD2 88.00 usec  
PL2 0.00 dB  
PL12 21.00 dB  
SFO2 500.1320005 MHz

F2 - Processing parameters  
SI 32768  
SF 125.7577935 MHz  
WDW EM  
SSB 0  
LB 1.00 Hz  
GB 0  
PC 1.40

1D NMR plot parameters  
CX 20.00 cm  
CY 8.00 cm  
F1P 220.000 ppm  
F1 27666.71 Hz  
F2P -10.000 ppm  
F2 -1257.58 Hz  
PPMCM 11.50000 ppm/cm  
HZCM 1446.21472 Hz/cm

<sup>1</sup>H NMR

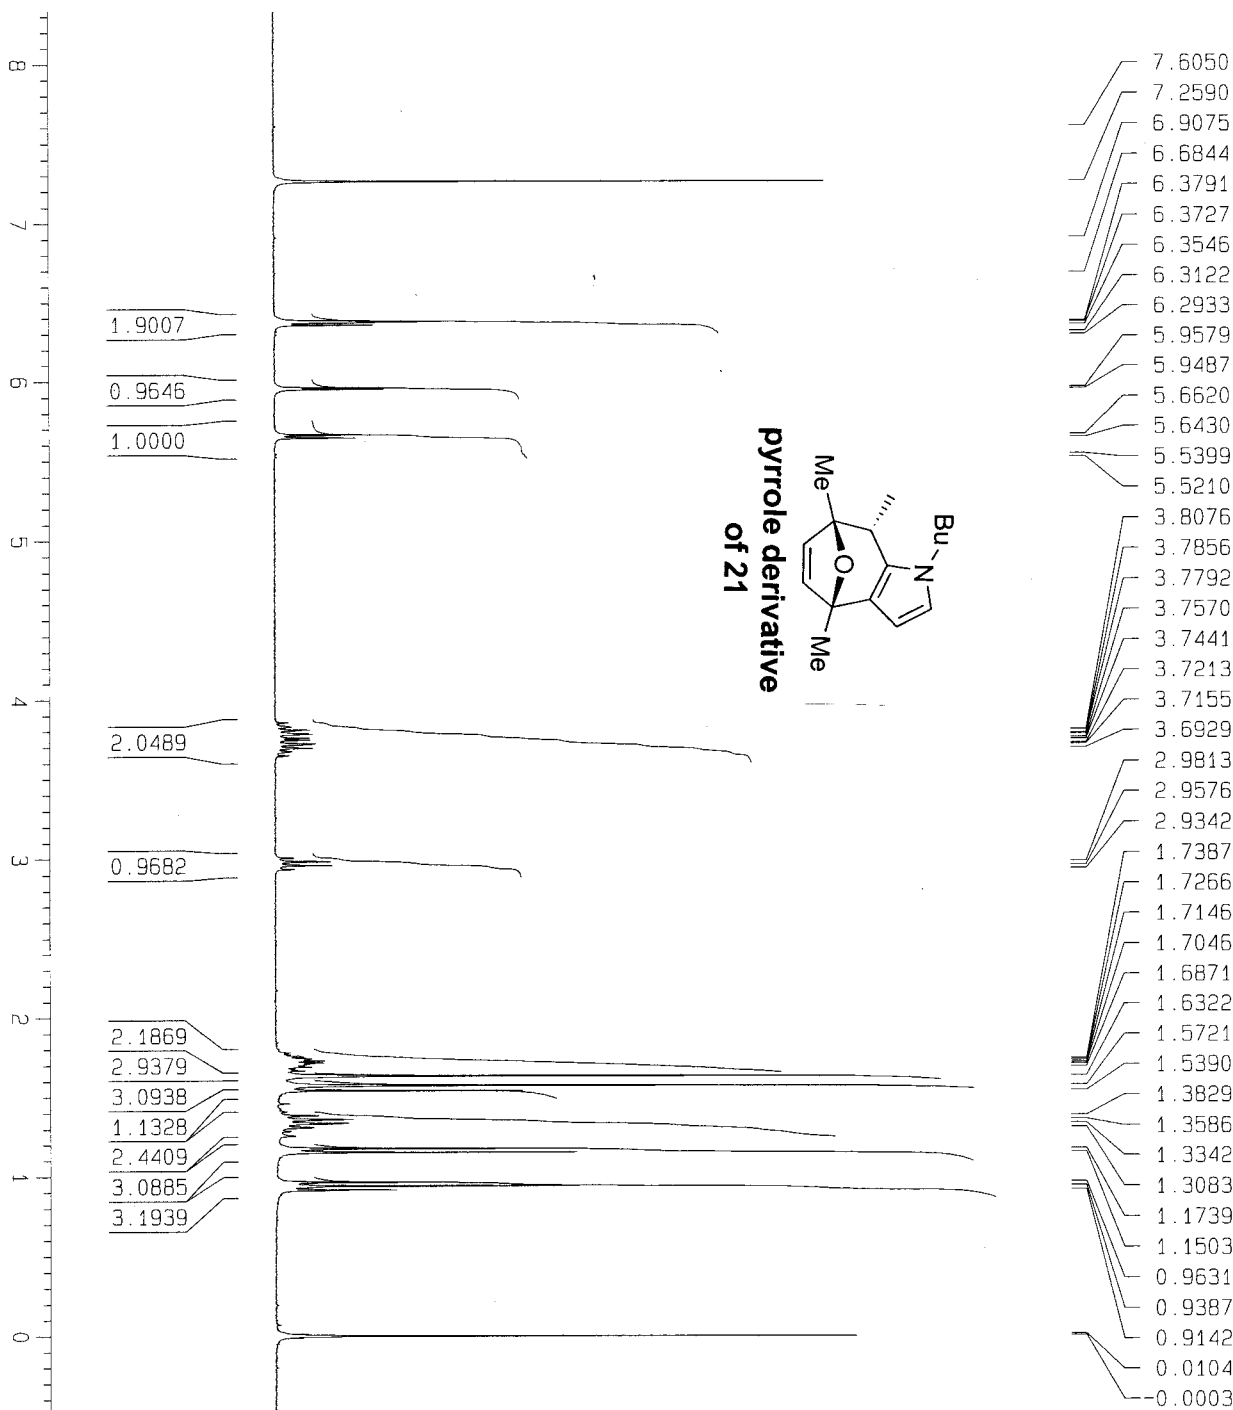

Current Data Parameters

| NAME   | VALUE |
|--------|-------|
| EXPNO  | 1     |
| PROCNO | 1     |

F2 - Acquisition Parameters

| Parameter | Value          |
|-----------|----------------|
| Date_     | 20021127       |
| Time      | 14.59          |
| INSTRUM   | dp300          |
| PROBHD    | 5 mm Multinuc1 |
| PULPROG   | zg30           |
| TD        | 32768          |
| SOLVENT   | CDCl3          |
| NS        | 16             |
| DS        | 2              |
| SWH       | 6172.939 Hz    |
| FIDRES    | 0.188360 Hz    |
| AQ        | 2.6542580 sec  |
| R6        | 64             |
| DW        | 81.000 usec    |
| DE        | 6.00 usec      |
| TE        | 300.0 K        |
| D1        | 1.00000000 sec |
| D31       | 0.00000000 sec |

==== CHANNEL f1 =====

| Parameter | Value           |
|-----------|-----------------|
| NUC1      | <sup>1</sup> H  |
| P1        | 7.50 usec       |
| PL1       | 0.00 dB         |
| SFO1      | 300.1318534 MHz |

F2 - Processing parameters

| Parameter | Value           |
|-----------|-----------------|
| SI        | 32768           |
| SF        | 300.1300065 MHz |
| WDW       | EM              |
| SSB       | 0               |
| LB        | 0.30 Hz         |
| GB        | 0               |
| PC        | 1.30            |

1D NMR plot parameters

| Parameter | Value           |
|-----------|-----------------|
| CX        | 20.00 cm        |
| CY        | 8.00 cm         |
| F1P       | 9.000 ppm       |
| F1        | 2701.17 Hz      |
| F2P       | -0.500 ppm      |
| F2        | -150.06 Hz      |
| PPMCM     | 0.47500 ppm/cm  |
| HZCM      | 142.56175 Hz/cm |

143.714  
129.469  
128.679  
124.097  
117.731  
101.372  
87.104  
83.414  
77.251  
76.998  
76.742  
47.090  
38.781  
33.136  
22.575  
20.196  
20.148  
13.736  
13.090  
-0.014

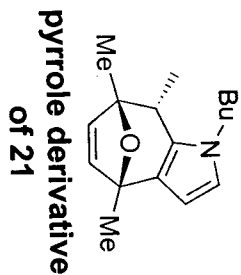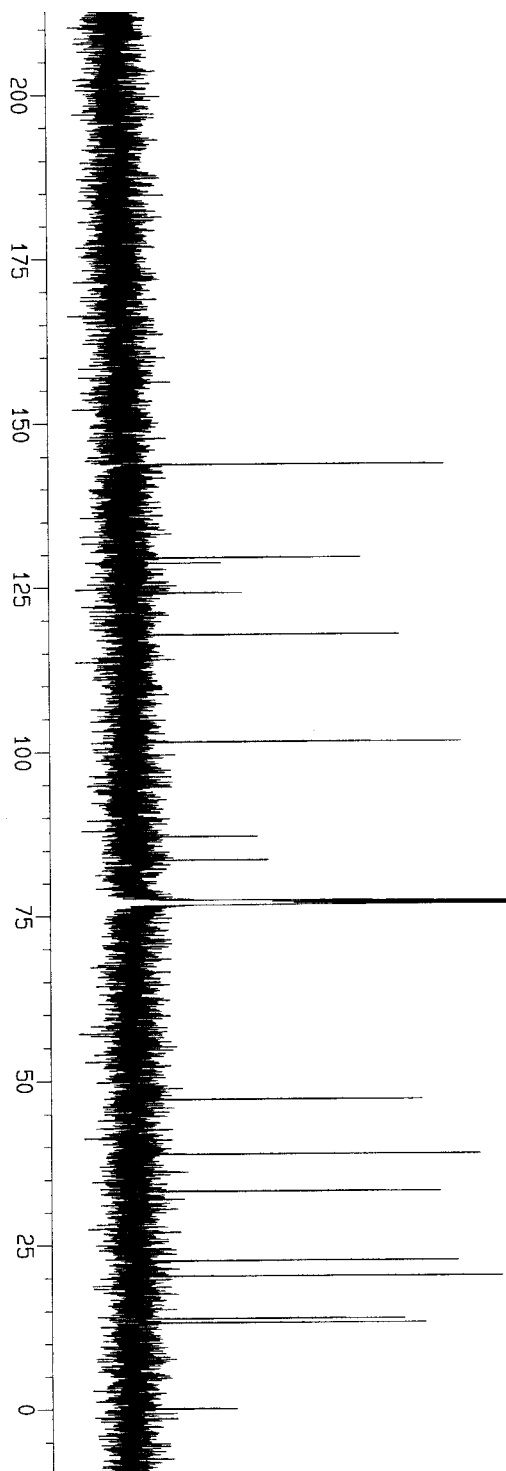

Current Data Parameters  
NAME XH-IV-9-1  
EXPNO 2  
PROCNO 1

F2 - Acquisition Parameters  
Date\_ 20021127  
Time 15.20

INSTRUM DRX500  
PROBHD 5 mm Multinuc1  
PULPROG zgpg30

TO 65536  
SOLVENT CDCl3  
NS 2013

DS 4  
SWH 39681.812 Hz  
FIDRES 0.605496 Hz

AG 0.8258188 sec  
RG 16384

DW 12.600 usec  
DE 6.00 usec

TE 298.0 K  
D1 1.00000000 sec  
d11 0.03000000 sec

===== CHANNEL f1 =====  
NUC1 13C  
P1 7.90 usec  
PL1 3.00 dB  
SFO1 125.7713108 MHz

===== CHANNEL f2 =====  
CPDPRG2 waltz16  
NUC2 1H  
PCPD2 88.00 usec  
PL2 0.00 dB  
PL12 21.00 dB  
SFO2 500.1320005 MHz

F2 - Processing parameters  
SI 32768  
SF 125.7577923 MHz  
WDW EM  
SSB 0  
LB 1.00 Hz  
GB 0  
PC 1.40

1D NMR plot parameters  
CX 20.00 cm  
CY 100.00 cm  
F1P 220.000 ppm  
F1 27666.71 Hz  
F2P -10.000 ppm  
F2 -1257.58 Hz  
PPMCM 11.50000 ppm/cm  
HZCM 1446.21460 Hz/cm

XH-IV-4/9 noesy

$H_b$   $H_a$

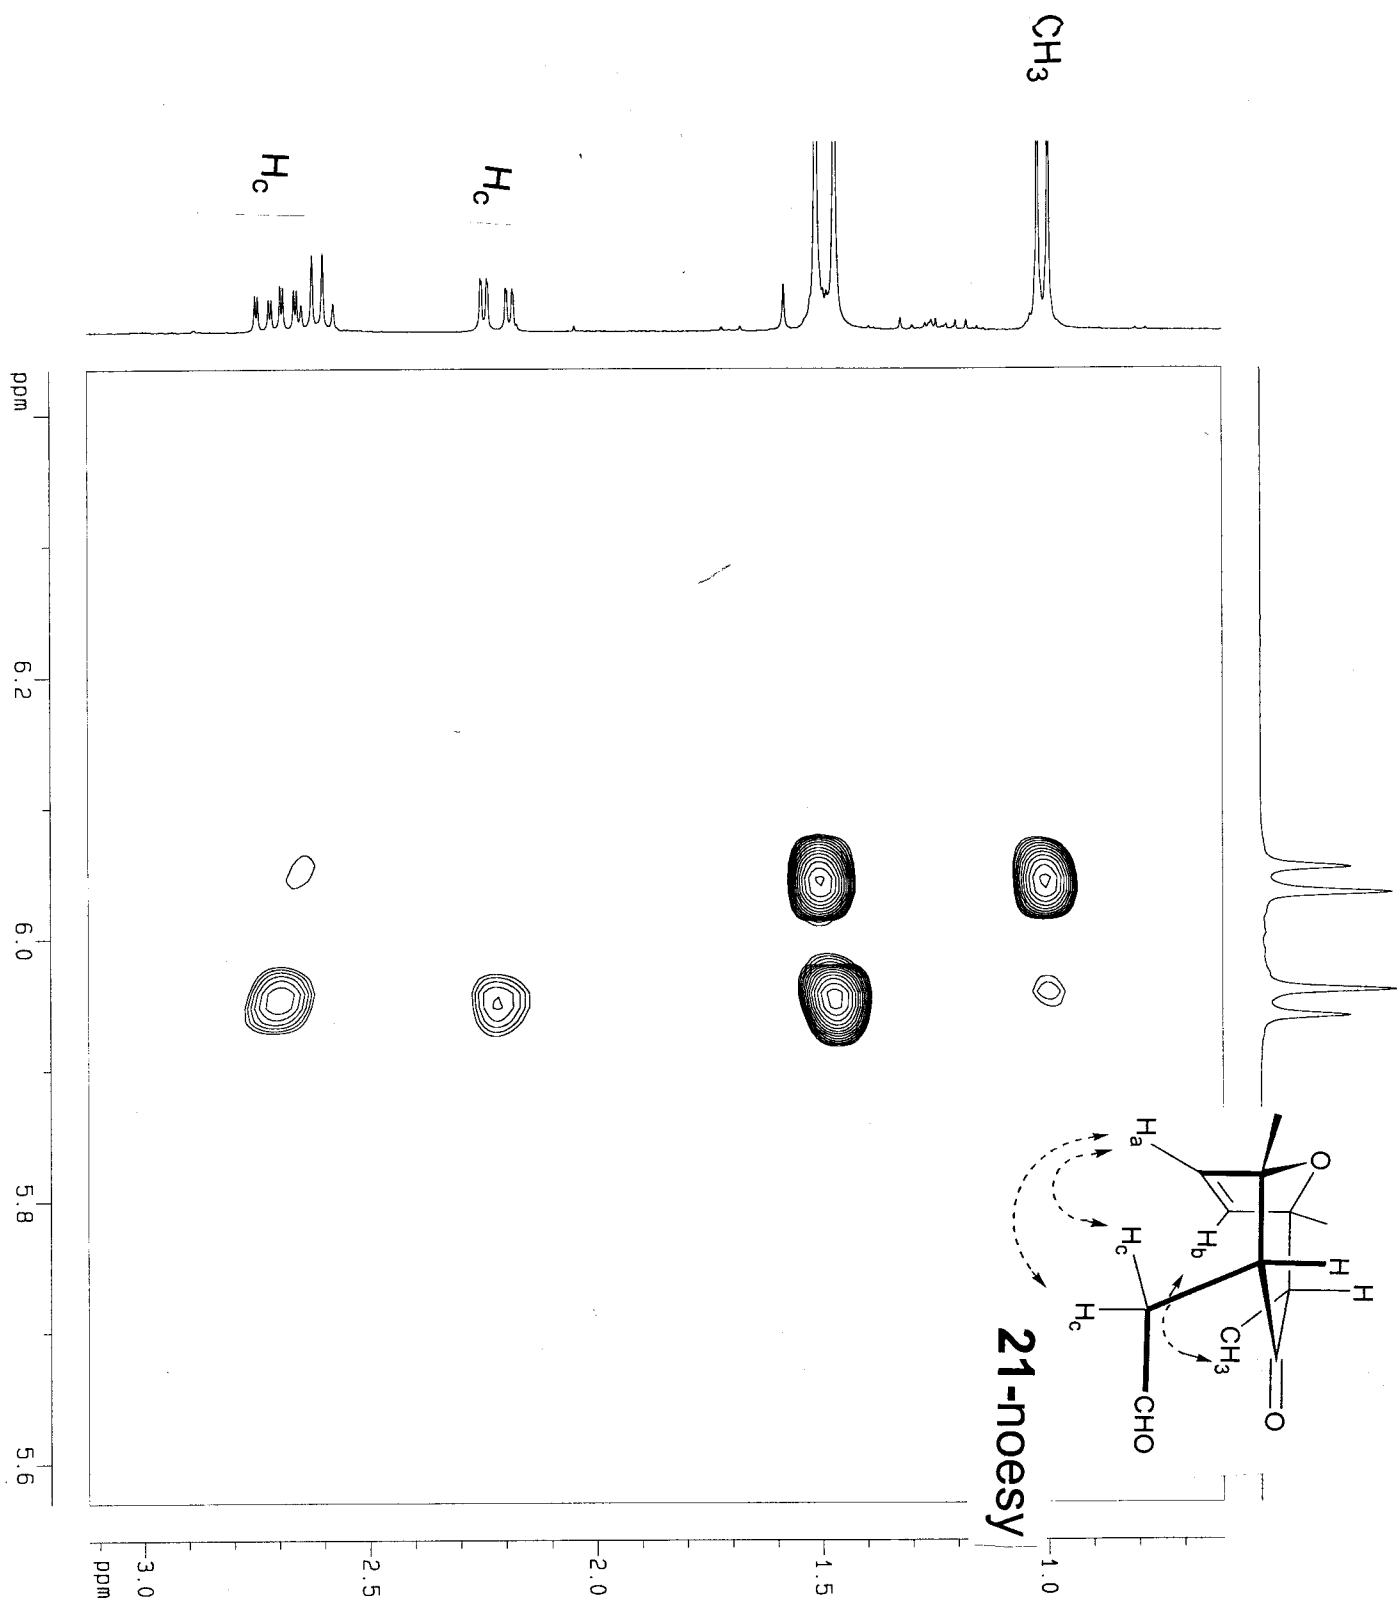

Current Data Parameters

|        |              |
|--------|--------------|
| NAME   | XH-IV-8-1-A1 |
| EXPNO  | 1            |
| PROCNO | 1            |

F2 - Acquisition Parameters

|         |                |
|---------|----------------|
| Date_   | 20021212       |
| Time    | 17.09          |
| INSTRUM | DRX500         |
| PROBHD  | 5 mm Multinuc1 |
| PULPROG | zg30           |
| TD      | 57344          |
| SOLVENT | CDCl3          |
| NS      | 16             |
| DS      | 2              |
| SWH     | 10330.578 Hz   |
| FIDRES  | 0.180151 Hz    |
| AQ      | 2.7754996 sec  |
| RG      | 64             |
| DW      | 48.400 usec    |
| DE      | 6.00 usec      |
| TE      | 296.7 K        |
| D1      | 1.00000000 sec |

===== CHANNEL f1 =====

|      |                 |
|------|-----------------|
| NUC1 | <sup>1</sup> H  |
| P1   | 13.25 usec      |
| PL1  | -3.00 dB        |
| SFO1 | 500.1330885 MHz |

F2 - Processing parameters

|     |                 |
|-----|-----------------|
| SI  | 32768           |
| SF  | 500.1300128 MHz |
| WDW | EM              |
| SSB | 0               |
| LB  | 1.50 Hz         |
| GB  | 0               |
| PC  | 1.40            |

1D NMR plot parameters

|       |                 |
|-------|-----------------|
| CX    | 20.00 cm        |
| CY    | 6.00 cm         |
| F1P   | 11.000 ppm      |
| F1    | 5501.43 Hz      |
| F2P   | -0.500 ppm      |
| F2    | -250.07 Hz      |
| PPMCM | 0.57500 ppm/cr  |
| HZCM  | 287.57477 Hz/cm |

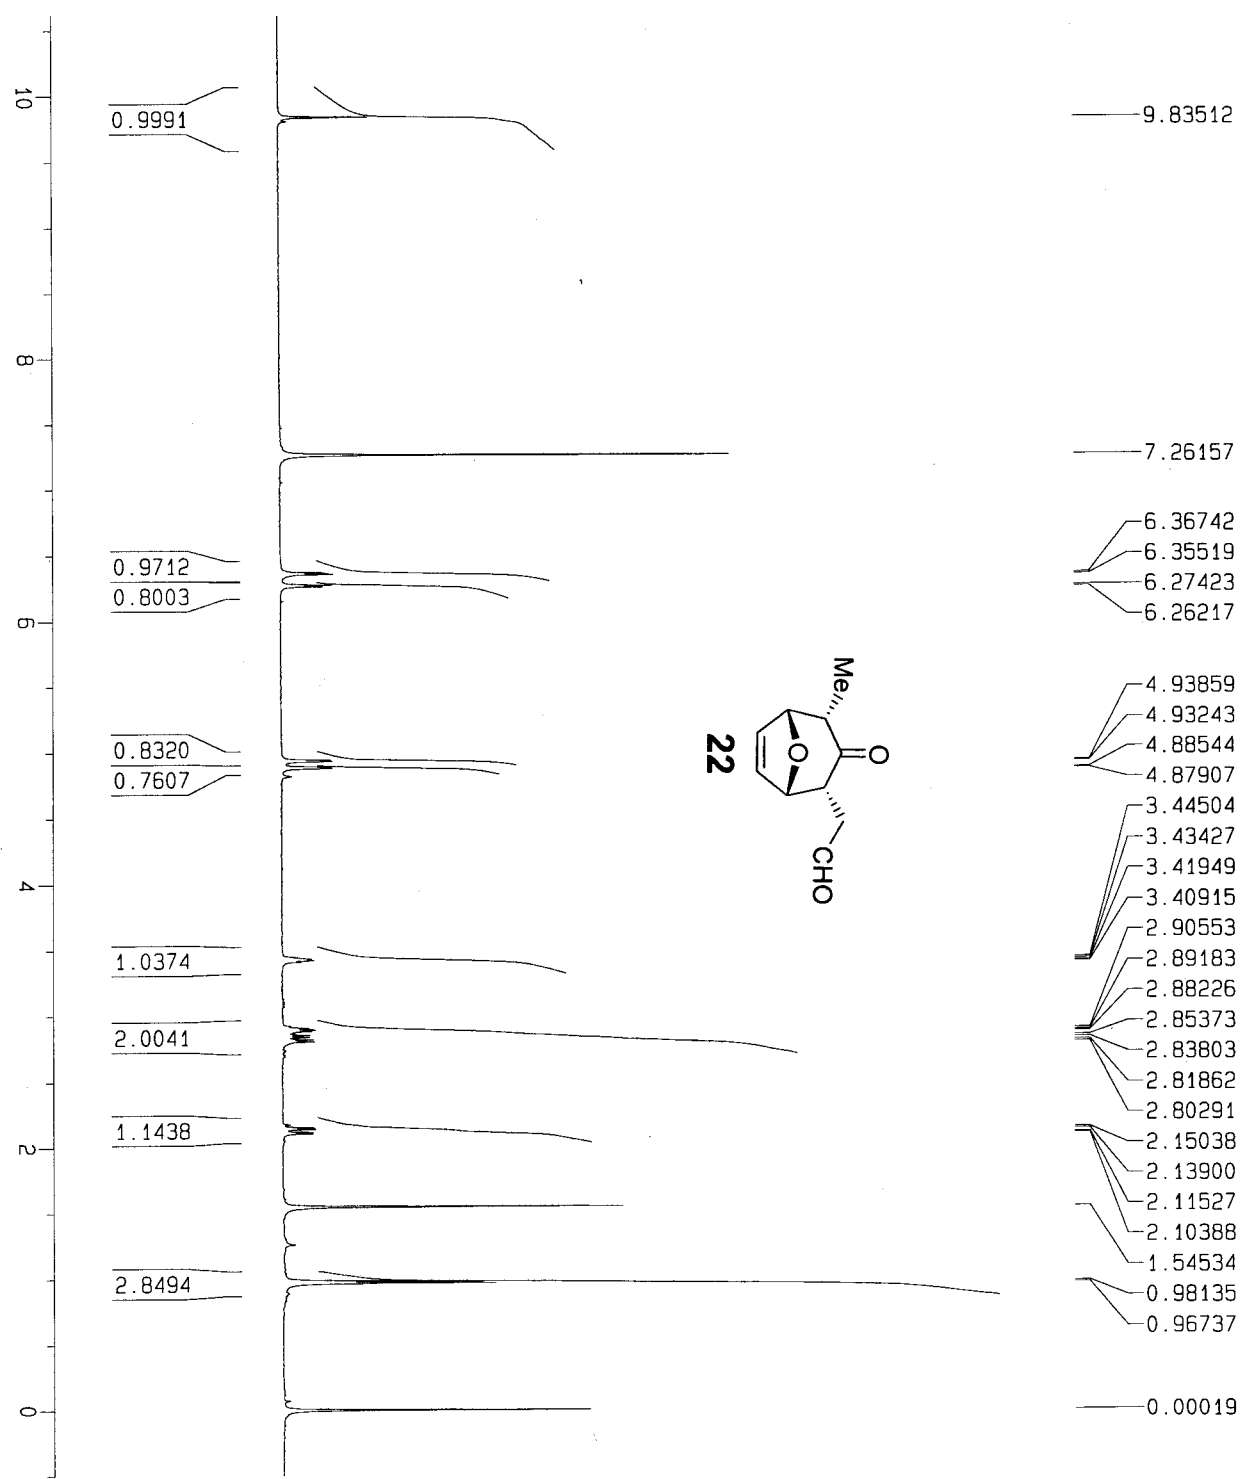

206.941  
199.466

134.180  
132.831

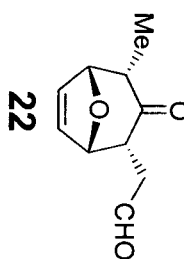

82.718  
81.159  
77.258  
77.002  
76.749

50.578  
50.415  
39.464

10.036  
-0.006

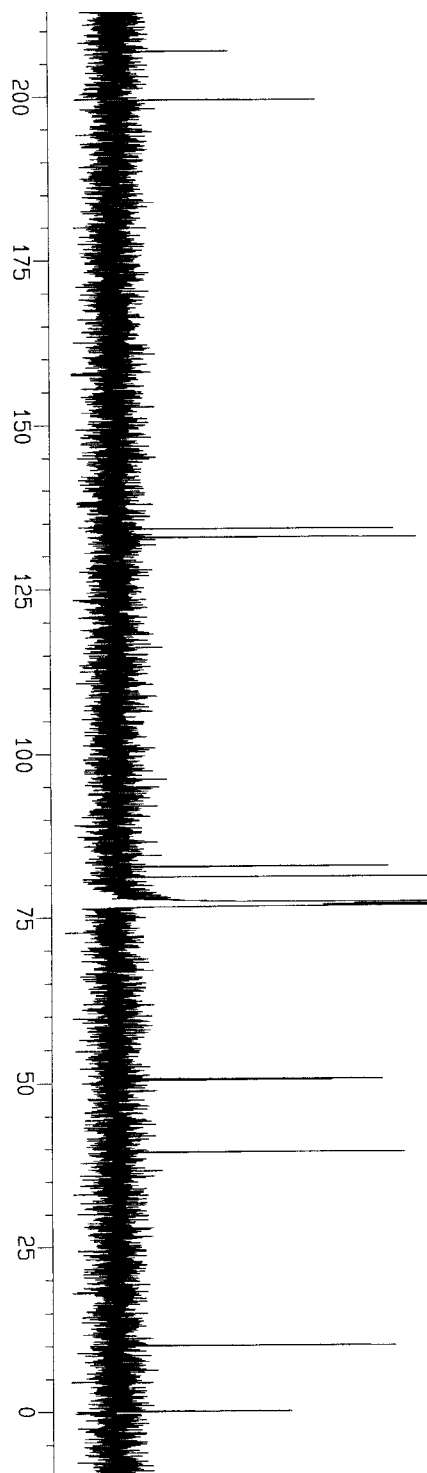

Current Data Parameters  
NAME XH-IV-8-1-A1  
EXPNO 2  
PROCNO 1

F2 - Acquisition Parameters  
Date\_ 20021212  
Time 17.13

INSTRUM DRX500  
PROBHD 5 mm Multinuc1  
PULPROG zgpg30

TD 65536  
SOLVENT CDCl3  
NS 6807

DS 4  
SWH 39681.812 Hz  
FIDRES 0.605496 Hz

AQ 0.8258188 sec  
RG 16384  
DE 12.600 usec

TE 298.0 K  
D1 1.00000000 sec  
d11 0.03000000 sec

===== CHANNEL f1 =====

NUC1 13C  
P1 7.90 usec  
PL1 3.00 dB  
SFO1 125.7713108 MHz

===== CHANNEL f2 =====

CPDPRG2 waltz16  
NUC2 1H  
PCPD2 88.00 usec  
PL2 0.00 dB  
PL12 21.00 dB  
SFO2 500.1320005 MHz

F2 - Processing parameters

SI 32768  
SF 125.7577910 MHz  
WDW EM  
SSB 0  
LB 1.00 Hz  
GB 0  
PC 1.40

1D NMR plot parameters

CX 20.00 cm  
CY 150.00 cm  
F1P 220.000 ppm  
F1 27666.71 Hz  
F2P -10.000 ppm  
F2 -1257.58 Hz  
PPMCM 11.50000 ppm/cm  
HZCM 1446.21460 Hz/cm

ppm

ppm

Integral

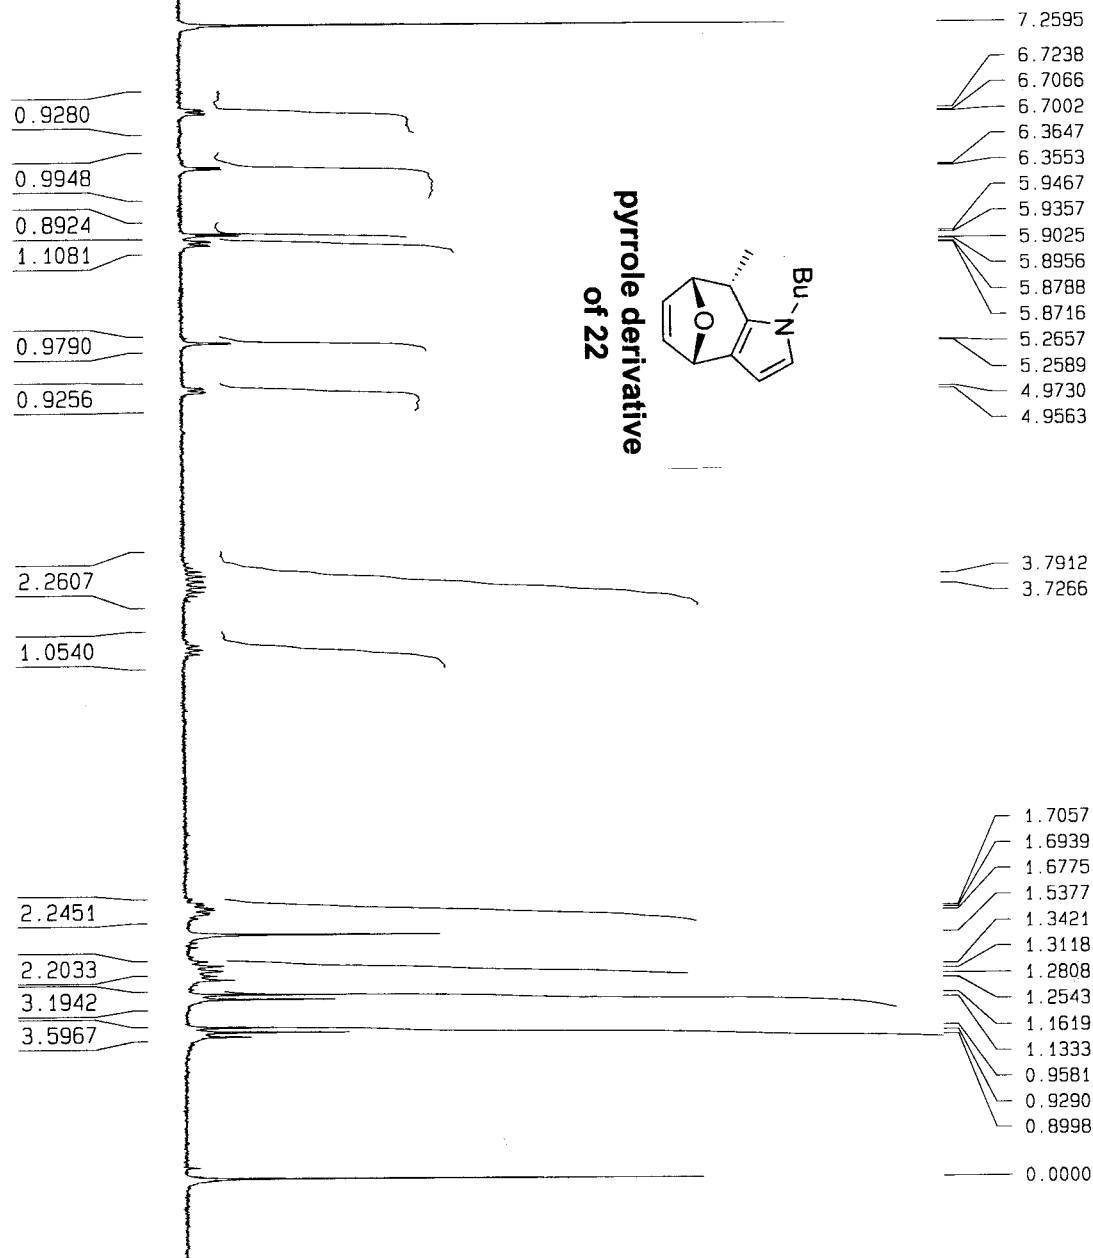

Current Data Parameters  
 NAME XH-IV-24-a1  
 EXPNO 1  
 PROCNO 1

F2 - Acquisition Parameters  
 Date\_ 20021214  
 Time 20.32

INSTRUM arx250  
 PROBD 5 mm GNP 1H  
 PULPROG zg30  
 TD 32768  
 SOLVENT CDCl3  
 NS 16  
 DS 2

SMH 5208.333 Hz  
 FIDRES 0.158946 Hz  
 AQ 3.1457779 sec  
 RG 256  
 DW 96.000 use  
 DE 137.14 use  
 TE 300.0 K

D1 1.00000000 sec  
 P1 8.70 use  
 SF01 250.1315321 MHz  
 NUCLEUS 1H

F2 - Processing parameters  
 SI 16384  
 SF 250.1300078 MHz  
 MDW EM  
 SSB 0  
 LB 0.20 Hz  
 GB 0  
 PC 1.50

1D NMR plot parameters  
 CX 20.00 cm  
 CY 8.00 cm  
 F1P 9.000 ppm  
 F1 2251.17 Hz  
 F2P -0.500 ppm  
 F2 -125.07 Hz  
 PPMCM 0.47500 ppm  
 HZCM 118.81175 Hz/



ppm

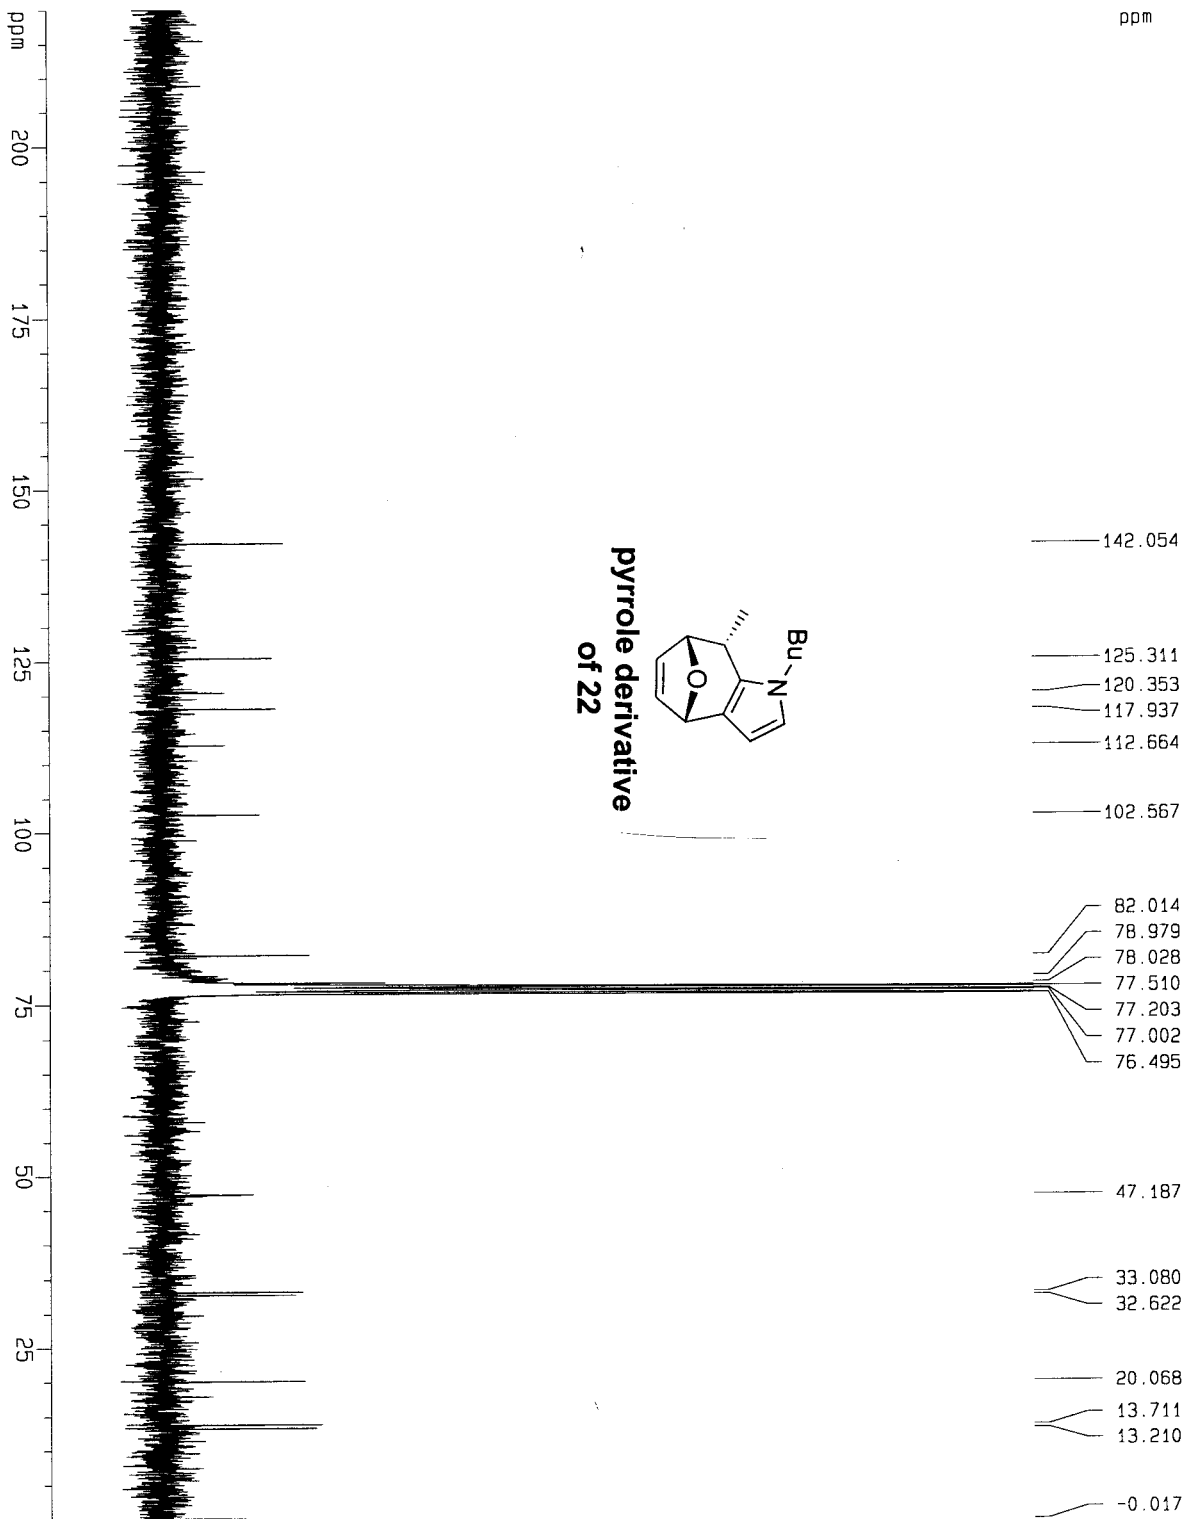

Current Data Parameters  
 NAME XH-IV-24-a1  
 EXPNO 2  
 PROCNO 1

F2 - Acquisition Parameters  
 Date\_ 20021215  
 Time 8.00  
 INSTRUM arx250  
 PROBHD 5 mm QNP 1H  
 PULPROG zgpg30  
 TD 36864  
 SOLVENT CDCl3  
 NS 28185  
 DS 4  
 SWH 17241.379 Hz  
 FIDRES 0.467702 Hz  
 AQ 1.0691060 sec  
 RG 22800  
 DW 29.000 use  
 DE 41.43 use  
 TE 300.0 K  
 D12 0.00002000 sec  
 DL5 23.00 dB  
 CPDPRG waltz16  
 P31 103.00 use  
 D1 1.00000000 sec  
 P1 5.35 use  
 SF01 62.9023694 MHz  
 NUCLEUS 13C  
 D11 0.03000000 sec

F2 - Processing parameters  
 SI 32768  
 SF 62.8952398 MHz  
 WDW EM  
 SSB 0  
 LB 1.00 Hz  
 GB 0  
 PC 1.00

1D NMR plot parameters  
 CX 20.00 cm  
 CY 100.00 cm  
 F1P 220.000 ppm  
 F1 13636.95 Hz  
 F2P -0.200 ppm  
 F2 -12.58 Hz  
 PPMCM 11.01000 ppm  
 HZCM 692.47656 Hz/

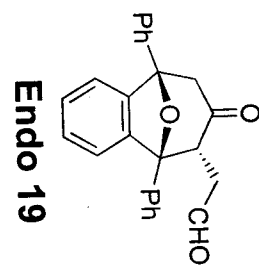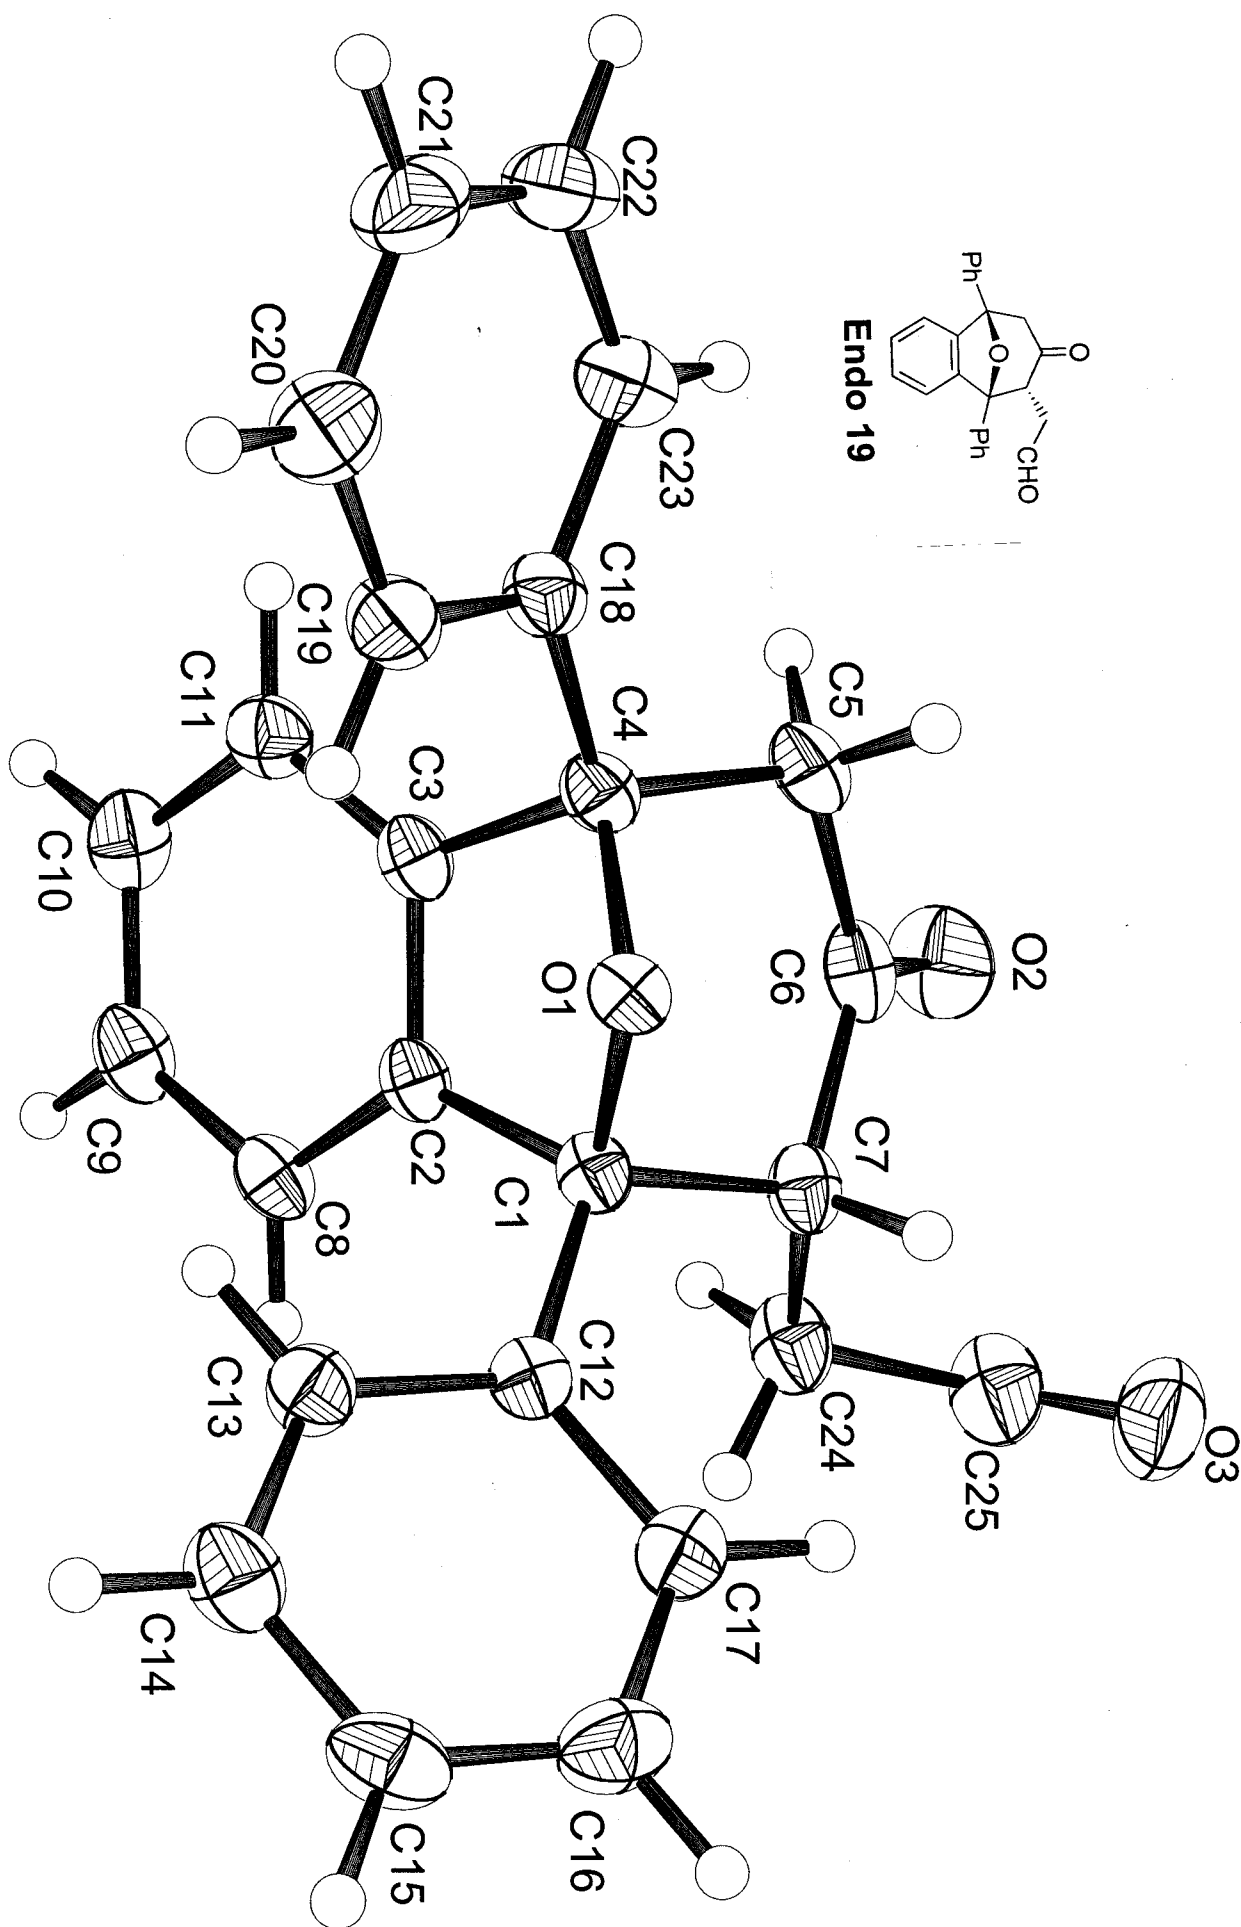

|                                   |                                                                                                                            |
|-----------------------------------|----------------------------------------------------------------------------------------------------------------------------|
| Identification code               | SG-77-1                                                                                                                    |
| Empirical formula                 | C <sub>25</sub> H <sub>20</sub> O <sub>3</sub>                                                                             |
| Formula weight                    | 368.41                                                                                                                     |
| Temperature                       | 173(2) K                                                                                                                   |
| Wavelength                        | 0.71073 Å                                                                                                                  |
| Crystal system, space group       | Monoclinic, P2 <sub>1</sub> -1/c                                                                                           |
| Unit cell dimensions              | a = 12.0876(11) Å    alpha = 90 deg.<br>b = 10.3640(10) Å    beta = 92.407(2) deg.<br>c = 14.9187(14) Å    gamma = 90 deg. |
| Volume                            | 1867.3(3) Å <sup>3</sup>                                                                                                   |
| Z, Calculated density             | 4, 1.310 Mg/m <sup>3</sup>                                                                                                 |
| Absorption coefficient            | 0.085 mm <sup>-1</sup>                                                                                                     |
| F(000)                            | 776                                                                                                                        |
| Crystal size                      | 0.45 x 0.45 x 0.20 mm                                                                                                      |
| Theta range for data collection   | 1.69 to 27.11 deg.                                                                                                         |
| Limiting indices                  | -15<=h<=14, -12<=k<=13, -17<=l<=19                                                                                         |
| Reflections collected / unique    | 11122 / 4105 [R(int) = 0.0274]                                                                                             |
| Completeness to theta = 27.11     | 99.3 %                                                                                                                     |
| Absorption correction             | Semi-empirical from equivalents                                                                                            |
| Max. and min. transmission        | 0.9832 and 0.9627                                                                                                          |
| Refinement method                 | Full-matrix least-squares on F <sup>2</sup>                                                                                |
| Data / restraints / parameters    | 4105 / 0 / 253                                                                                                             |
| Goodness-of-fit on F <sup>2</sup> | 1.024                                                                                                                      |
| Final R indices [I>2sigma(I)]     | R1 = 0.0375, wR2 = 0.0843                                                                                                  |
| R indices (all data)              | R1 = 0.0636, wR2 = 0.0943                                                                                                  |
| Largest diff. peak and hole       | 0.215 and -0.160 e.Å <sup>-3</sup>                                                                                         |

displacement parameters ( $\text{\AA}^2 \times 10^3$ ) for Sg771.

$U(\text{eq})$  is defined as one third of the trace of the orthogonalized  $U_{ij}$  tensor.

|       | x       | y       | z       | $U(\text{eq})$ |
|-------|---------|---------|---------|----------------|
| O(1)  | 6391(1) | 6338(1) | 1174(1) | 24(1)          |
| O(2)  | 7439(1) | 2820(1) | 1872(1) | 48(1)          |
| O(3)  | 9842(1) | 3415(1) | 995(1)  | 57(1)          |
| C(1)  | 7394(1) | 6280(1) | 1747(1) | 24(1)          |
| C(2)  | 6931(1) | 6239(1) | 2681(1) | 24(1)          |
| C(3)  | 5842(1) | 5812(1) | 2591(1) | 25(1)          |
| C(4)  | 5588(1) | 5530(1) | 1599(1) | 25(1)          |
| C(5)  | 5911(1) | 4126(1) | 1386(1) | 31(1)          |
| C(6)  | 7120(1) | 3877(1) | 1623(1) | 32(1)          |
| C(7)  | 7954(1) | 4977(1) | 1537(1) | 27(1)          |
| C(8)  | 7405(1) | 6540(1) | 3520(1) | 28(1)          |
| C(9)  | 6748(1) | 6448(1) | 4259(1) | 34(1)          |
| C(10) | 5650(1) | 6058(1) | 4163(1) | 35(1)          |
| C(11) | 5184(1) | 5722(1) | 3326(1) | 30(1)          |
| C(12) | 8049(1) | 7486(1) | 1540(1) | 24(1)          |
| C(13) | 7681(1) | 8654(1) | 1876(1) | 31(1)          |
| C(14) | 8189(1) | 9810(1) | 1673(1) | 37(1)          |
| C(15) | 9084(1) | 9805(2) | 1125(1) | 39(1)          |
| C(16) | 9458(1) | 8657(2) | 781(1)  | 40(1)          |
| C(17) | 8942(1) | 7497(1) | 984(1)  | 32(1)          |
| C(18) | 4433(1) | 5916(1) | 1273(1) | 27(1)          |
| C(19) | 4180(1) | 7220(1) | 1157(1) | 34(1)          |
| C(20) | 3118(1) | 7600(2) | 895(1)  | 44(1)          |
| C(21) | 2290(1) | 6690(2) | 761(1)  | 45(1)          |
| C(22) | 2528(1) | 5398(2) | 885(1)  | 42(1)          |
| C(23) | 3598(1) | 5010(2) | 1129(1) | 34(1)          |
| C(24) | 8992(1) | 4682(1) | 2120(1) | 35(1)          |
| C(25) | 9661(1) | 3596(2) | 1766(1) | 46(1)          |

Table 3. Bond lengths [Å] and angles [deg] for sg771.

---

|                   |            |
|-------------------|------------|
| O(1)-C(4)         | 1.4485(15) |
| O(1)-C(1)         | 1.4554(15) |
| O(2)-C(6)         | 1.2141(17) |
| O(3)-C(25)        | 1.194(2)   |
| C(1)-C(12)        | 1.5179(18) |
| C(1)-C(2)         | 1.5251(18) |
| C(1)-C(7)         | 1.5479(17) |
| C(2)-C(3)         | 1.3891(18) |
| C(2)-C(8)         | 1.3902(18) |
| C(3)-C(11)        | 1.3844(19) |
| C(3)-C(4)         | 1.5264(18) |
| C(4)-C(18)        | 1.5130(18) |
| C(4)-C(5)         | 1.5432(18) |
| C(5)-C(6)         | 1.511(2)   |
| C(6)-C(7)         | 1.530(2)   |
| C(7)-C(24)        | 1.5274(18) |
| C(8)-C(9)         | 1.388(2)   |
| C(9)-C(10)        | 1.390(2)   |
| C(10)-C(11)       | 1.392(2)   |
| C(12)-C(17)       | 1.3885(19) |
| C(12)-C(13)       | 1.3913(19) |
| C(13)-C(14)       | 1.386(2)   |
| C(14)-C(15)       | 1.383(2)   |
| C(15)-C(16)       | 1.380(2)   |
| C(16)-C(17)       | 1.394(2)   |
| C(18)-C(23)       | 1.3894(19) |
| C(18)-C(19)       | 1.395(2)   |
| C(19)-C(20)       | 1.383(2)   |
| C(20)-C(21)       | 1.383(2)   |
| C(21)-C(22)       | 1.380(2)   |
| C(22)-C(23)       | 1.388(2)   |
| C(24)-C(25)       | 1.496(2)   |
|                   |            |
| C(4)-O(1)-C(1)    | 105.99(9)  |
| O(1)-C(1)-C(12)   | 105.99(10) |
| O(1)-C(1)-C(2)    | 102.06(9)  |
| C(12)-C(1)-C(2)   | 115.06(10) |
| O(1)-C(1)-C(7)    | 106.14(10) |
| C(12)-C(1)-C(7)   | 116.18(10) |
| C(2)-C(1)-C(7)    | 109.91(10) |
| C(3)-C(2)-C(8)    | 120.80(12) |
| C(3)-C(2)-C(1)    | 107.63(11) |
| C(8)-C(2)-C(1)    | 131.57(12) |
| C(11)-C(3)-C(2)   | 121.17(12) |
| C(11)-C(3)-C(4)   | 130.98(12) |
| C(2)-C(3)-C(4)    | 107.84(11) |
| O(1)-C(4)-C(18)   | 109.40(10) |
| O(1)-C(4)-C(3)    | 101.69(10) |
| C(18)-C(4)-C(3)   | 113.96(11) |
| O(1)-C(4)-C(5)    | 105.97(10) |
| C(18)-C(4)-C(5)   | 114.90(11) |
| C(3)-C(4)-C(5)    | 109.79(11) |
| C(6)-C(5)-C(4)    | 111.29(11) |
| O(2)-C(6)-C(5)    | 121.13(13) |
| O(2)-C(6)-C(7)    | 119.74(13) |
| C(5)-C(6)-C(7)    | 119.14(11) |
| C(24)-C(7)-C(6)   | 109.35(11) |
| C(24)-C(7)-C(1)   | 114.54(11) |
| C(6)-C(7)-C(1)    | 109.77(11) |
| C(9)-C(8)-C(2)    | 118.14(13) |
| C(8)-C(9)-C(10)   | 120.89(13) |
| C(9)-C(10)-C(11)  | 120.93(13) |
| C(3)-C(11)-C(10)  | 118.01(13) |
| C(17)-C(12)-C(13) | 118.46(13) |
| C(17)-C(12)-C(1)  | 123.61(12) |
| C(13)-C(12)-C(1)  | 117.77(11) |
| C(14)-C(13)-C(12) | 121.47(13) |
| C(15)-C(14)-C(13) | 119.40(14) |

|                   |            |
|-------------------|------------|
| C(16)-C(15)-C(14) | 120.04(13) |
| C(15)-C(16)-C(17) | 120.37(14) |
| C(12)-C(17)-C(16) | 120.26(14) |
| C(23)-C(18)-C(19) | 118.79(13) |
| C(23)-C(18)-C(4)  | 121.74(12) |
| C(19)-C(18)-C(4)  | 119.39(12) |
| C(20)-C(19)-C(18) | 120.44(14) |
| C(21)-C(20)-C(19) | 120.29(15) |
| C(22)-C(21)-C(20) | 119.72(15) |
| C(21)-C(22)-C(23) | 120.24(14) |
| C(22)-C(23)-C(18) | 120.49(14) |
| C(25)-C(24)-C(7)  | 113.13(12) |
| O(3)-C(25)-C(24)  | 125.61(15) |

---

Symmetry transformations used to generate equivalent atoms:

Table 4. Anisotropic displacement parameters ( $\text{\AA}^2 \times 10^{-3}$ ) for sg771.  
The anisotropic displacement factor exponent takes the form:  
 $-2 \pi^2 [ h^2 a^{*2} U_{11} + \dots + 2 h k a^* b^* U_{12} ]$

|       | U11   | U22   | U33   | U23    | U13    | U12    |
|-------|-------|-------|-------|--------|--------|--------|
| O(1)  | 26(1) | 22(1) | 23(1) | 1(1)   | -2(1)  | 0(1)   |
| O(2)  | 56(1) | 23(1) | 64(1) | 6(1)   | -1(1)  | 9(1)   |
| O(3)  | 53(1) | 66(1) | 54(1) | -16(1) | 7(1)   | 15(1)  |
| C(1)  | 25(1) | 22(1) | 24(1) | -1(1)  | -3(1)  | 3(1)   |
| C(2)  | 30(1) | 15(1) | 25(1) | 1(1)   | 0(1)   | 1(1)   |
| C(3)  | 33(1) | 17(1) | 26(1) | 1(1)   | -1(1)  | 0(1)   |
| C(4)  | 29(1) | 22(1) | 25(1) | 0(1)   | 0(1)   | -2(1)  |
| C(5)  | 40(1) | 21(1) | 31(1) | -3(1)  | -2(1)  | -3(1)  |
| C(6)  | 44(1) | 23(1) | 27(1) | -4(1)  | 0(1)   | 4(1)   |
| C(7)  | 32(1) | 24(1) | 26(1) | -2(1)  | -1(1)  | 6(1)   |
| C(8)  | 35(1) | 22(1) | 27(1) | 0(1)   | -4(1)  | -1(1)  |
| C(9)  | 48(1) | 29(1) | 23(1) | 0(1)   | -3(1)  | -1(1)  |
| C(10) | 49(1) | 29(1) | 28(1) | 3(1)   | 9(1)   | -2(1)  |
| C(11) | 35(1) | 24(1) | 32(1) | 3(1)   | 4(1)   | -4(1)  |
| C(12) | 25(1) | 24(1) | 22(1) | 2(1)   | -2(1)  | 2(1)   |
| C(13) | 33(1) | 25(1) | 33(1) | 1(1)   | 4(1)   | 0(1)   |
| C(14) | 47(1) | 24(1) | 41(1) | 2(1)   | 1(1)   | -1(1)  |
| C(15) | 44(1) | 34(1) | 38(1) | 11(1)  | -3(1)  | -13(1) |
| C(16) | 36(1) | 48(1) | 35(1) | 7(1)   | 6(1)   | -6(1)  |
| C(17) | 32(1) | 34(1) | 31(1) | -1(1)  | 3(1)   | 2(1)   |
| C(18) | 28(1) | 30(1) | 23(1) | -2(1)  | 0(1)   | -2(1)  |
| C(19) | 32(1) | 31(1) | 39(1) | -4(1)  | -3(1)  | 1(1)   |
| C(20) | 37(1) | 43(1) | 52(1) | -4(1)  | -5(1)  | 9(1)   |
| C(21) | 28(1) | 66(1) | 42(1) | -4(1)  | -3(1)  | 5(1)   |
| C(22) | 33(1) | 57(1) | 35(1) | -1(1)  | -1(1)  | -14(1) |
| C(23) | 35(1) | 37(1) | 31(1) | 3(1)   | -2(1)  | -7(1)  |
| C(24) | 38(1) | 30(1) | 35(1) | -4(1)  | -7(1)  | 9(1)   |
| C(25) | 42(1) | 45(1) | 49(1) | -7(1)  | -11(1) | 18(1)  |

Table 5. Hydrogen coordinates ( $\times 10^{-4}$ ) and isotropic displacement parameters ( $\text{\AA}^2 \times 10^3$ ) for sg771.

|        | x     | y     | z    | U(eq) |
|--------|-------|-------|------|-------|
| H(5A)  | 5450  | 3527  | 1728 | 37    |
| H(5B)  | 5763  | 3956  | 739  | 37    |
| H(7)   | 8174  | 5005  | 899  | 33    |
| H(8)   | 8157  | 6802  | 3586 | 34    |
| H(9)   | 7054  | 6654  | 4838 | 40    |
| H(10)  | 5210  | 6021  | 4675 | 42    |
| H(11)  | 4438  | 5438  | 3261 | 36    |
| H(13)  | 7067  | 8660  | 2254 | 37    |
| H(14)  | 7925  | 10599 | 1908 | 45    |
| H(15)  | 9441  | 10592 | 986  | 47    |
| H(16)  | 10072 | 8657  | 403  | 47    |
| H(17)  | 9202  | 6712  | 741  | 38    |
| H(19)  | 4741  | 7852  | 1259 | 40    |
| H(20)  | 2957  | 8489  | 806  | 53    |
| H(21)  | 1560  | 6953  | 584  | 54    |
| H(22)  | 1958  | 4773  | 802  | 50    |
| H(23)  | 3759  | 4117  | 1198 | 41    |
| H(24A) | 9459  | 5466  | 2163 | 41    |
| H(24B) | 8771  | 4463  | 2733 | 41    |
| H(25)  | 9968  | 2998  | 2190 | 55    |



Table 6. Torsion angles [deg] for sg771.

|                         |              |
|-------------------------|--------------|
| C(4)-O(1)-C(1)-C(12)    | -157.54 (10) |
| C(4)-O(1)-C(1)-C(2)     | -36.76 (11)  |
| C(4)-O(1)-C(1)-C(7)     | 78.36 (11)   |
| O(1)-C(1)-C(2)-C(3)     | 21.06 (12)   |
| C(12)-C(1)-C(2)-C(3)    | 135.32 (11)  |
| C(7)-C(1)-C(2)-C(3)     | -91.27 (12)  |
| O(1)-C(1)-C(2)-C(8)     | -158.92 (13) |
| C(12)-C(1)-C(2)-C(8)    | -44.66 (18)  |
| C(7)-C(1)-C(2)-C(8)     | 88.76 (16)   |
| C(8)-C(2)-C(3)-C(11)    | 2.49 (19)    |
| C(1)-C(2)-C(3)-C(11)    | -177.49 (12) |
| C(8)-C(2)-C(3)-C(4)     | -178.36 (11) |
| C(1)-C(2)-C(3)-C(4)     | 1.66 (13)    |
| C(1)-O(1)-C(4)-C(18)    | 158.44 (10)  |
| C(1)-O(1)-C(4)-C(3)     | 37.61 (11)   |
| C(1)-O(1)-C(4)-C(5)     | -77.15 (11)  |
| C(11)-C(3)-C(4)-O(1)    | 155.19 (13)  |
| C(2)-C(3)-C(4)-O(1)     | -23.85 (12)  |
| C(11)-C(3)-C(4)-C(18)   | 37.59 (19)   |
| C(2)-C(3)-C(4)-C(18)    | -141.44 (11) |
| C(11)-C(3)-C(4)-C(5)    | -92.91 (16)  |
| C(2)-C(3)-C(4)-C(5)     | 88.05 (12)   |
| O(1)-C(4)-C(5)-C(6)     | 51.50 (14)   |
| C(18)-C(4)-C(5)-C(6)    | 172.42 (11)  |
| C(3)-C(4)-C(5)-C(6)     | -57.58 (14)  |
| C(4)-C(5)-C(6)-O(2)     | 148.45 (14)  |
| C(4)-C(5)-C(6)-C(7)     | -32.16 (17)  |
| O(2)-C(6)-C(7)-C(24)    | -21.61 (18)  |
| C(5)-C(6)-C(7)-C(24)    | 159.00 (12)  |
| O(2)-C(6)-C(7)-C(1)     | -148.04 (13) |
| C(5)-C(6)-C(7)-C(1)     | 32.56 (16)   |
| O(1)-C(1)-C(7)-C(24)    | -176.01 (11) |
| C(12)-C(1)-C(7)-C(24)   | 66.49 (15)   |
| C(2)-C(1)-C(7)-C(24)    | -66.36 (14)  |
| O(1)-C(1)-C(7)-C(6)     | -52.57 (13)  |
| C(12)-C(1)-C(7)-C(6)    | -170.07 (11) |
| C(2)-C(1)-C(7)-C(6)     | 57.08 (13)   |
| C(3)-C(2)-C(8)-C(9)     | -2.28 (19)   |
| C(1)-C(2)-C(8)-C(9)     | 177.69 (13)  |
| C(2)-C(8)-C(9)-C(10)    | 0.3 (2)      |
| C(8)-C(9)-C(10)-C(11)   | 1.5 (2)      |
| C(2)-C(3)-C(11)-C(10)   | -0.66 (19)   |
| C(4)-C(3)-C(11)-C(10)   | -179.59 (13) |
| C(9)-C(10)-C(11)-C(3)   | -1.3 (2)     |
| O(1)-C(1)-C(12)-C(17)   | -100.48 (14) |
| C(2)-C(1)-C(12)-C(17)   | 147.56 (12)  |
| C(7)-C(1)-C(12)-C(17)   | 17.11 (18)   |
| O(1)-C(1)-C(12)-C(13)   | 74.71 (14)   |
| C(2)-C(1)-C(12)-C(13)   | -37.25 (16)  |
| C(7)-C(1)-C(12)-C(13)   | -167.70 (12) |
| C(17)-C(12)-C(13)-C(14) | -0.5 (2)     |
| C(1)-C(12)-C(13)-C(14)  | -175.92 (13) |
| C(12)-C(13)-C(14)-C(15) | -0.1 (2)     |
| C(13)-C(14)-C(15)-C(16) | 0.5 (2)      |
| C(14)-C(15)-C(16)-C(17) | -0.3 (2)     |
| C(13)-C(12)-C(17)-C(16) | 0.7 (2)      |
| C(1)-C(12)-C(17)-C(16)  | 175.90 (12)  |
| C(15)-C(16)-C(17)-C(12) | -0.4 (2)     |
| O(1)-C(4)-C(18)-C(23)   | 143.46 (12)  |
| C(3)-C(4)-C(18)-C(23)   | -103.48 (15) |
| C(5)-C(4)-C(18)-C(23)   | 24.45 (18)   |
| O(1)-C(4)-C(18)-C(19)   | -39.92 (16)  |
| C(3)-C(4)-C(18)-C(19)   | 73.14 (16)   |
| C(5)-C(4)-C(18)-C(19)   | -158.94 (13) |
| C(23)-C(18)-C(19)-C(20) | -0.7 (2)     |
| C(4)-C(18)-C(19)-C(20)  | -177.38 (13) |
| C(18)-C(19)-C(20)-C(21) | 1.2 (2)      |
| C(19)-C(20)-C(21)-C(22) | -0.4 (2)     |

|                         |             |
|-------------------------|-------------|
| C(20)-C(21)-C(22)-C(23) | -1.0(2)     |
| C(21)-C(22)-C(23)-C(18) | 1.6(2)      |
| C(19)-C(18)-C(23)-C(22) | -0.7(2)     |
| C(4)-C(18)-C(23)-C(22)  | 175.90(13)  |
| C(6)-C(7)-C(24)-C(25)   | 70.21(16)   |
| C(1)-C(7)-C(24)-C(25)   | -166.13(13) |
| C(7)-C(24)-C(25)-O(3)   | 40.8(2)     |

---

Symmetry transformations used to generate equivalent atoms:

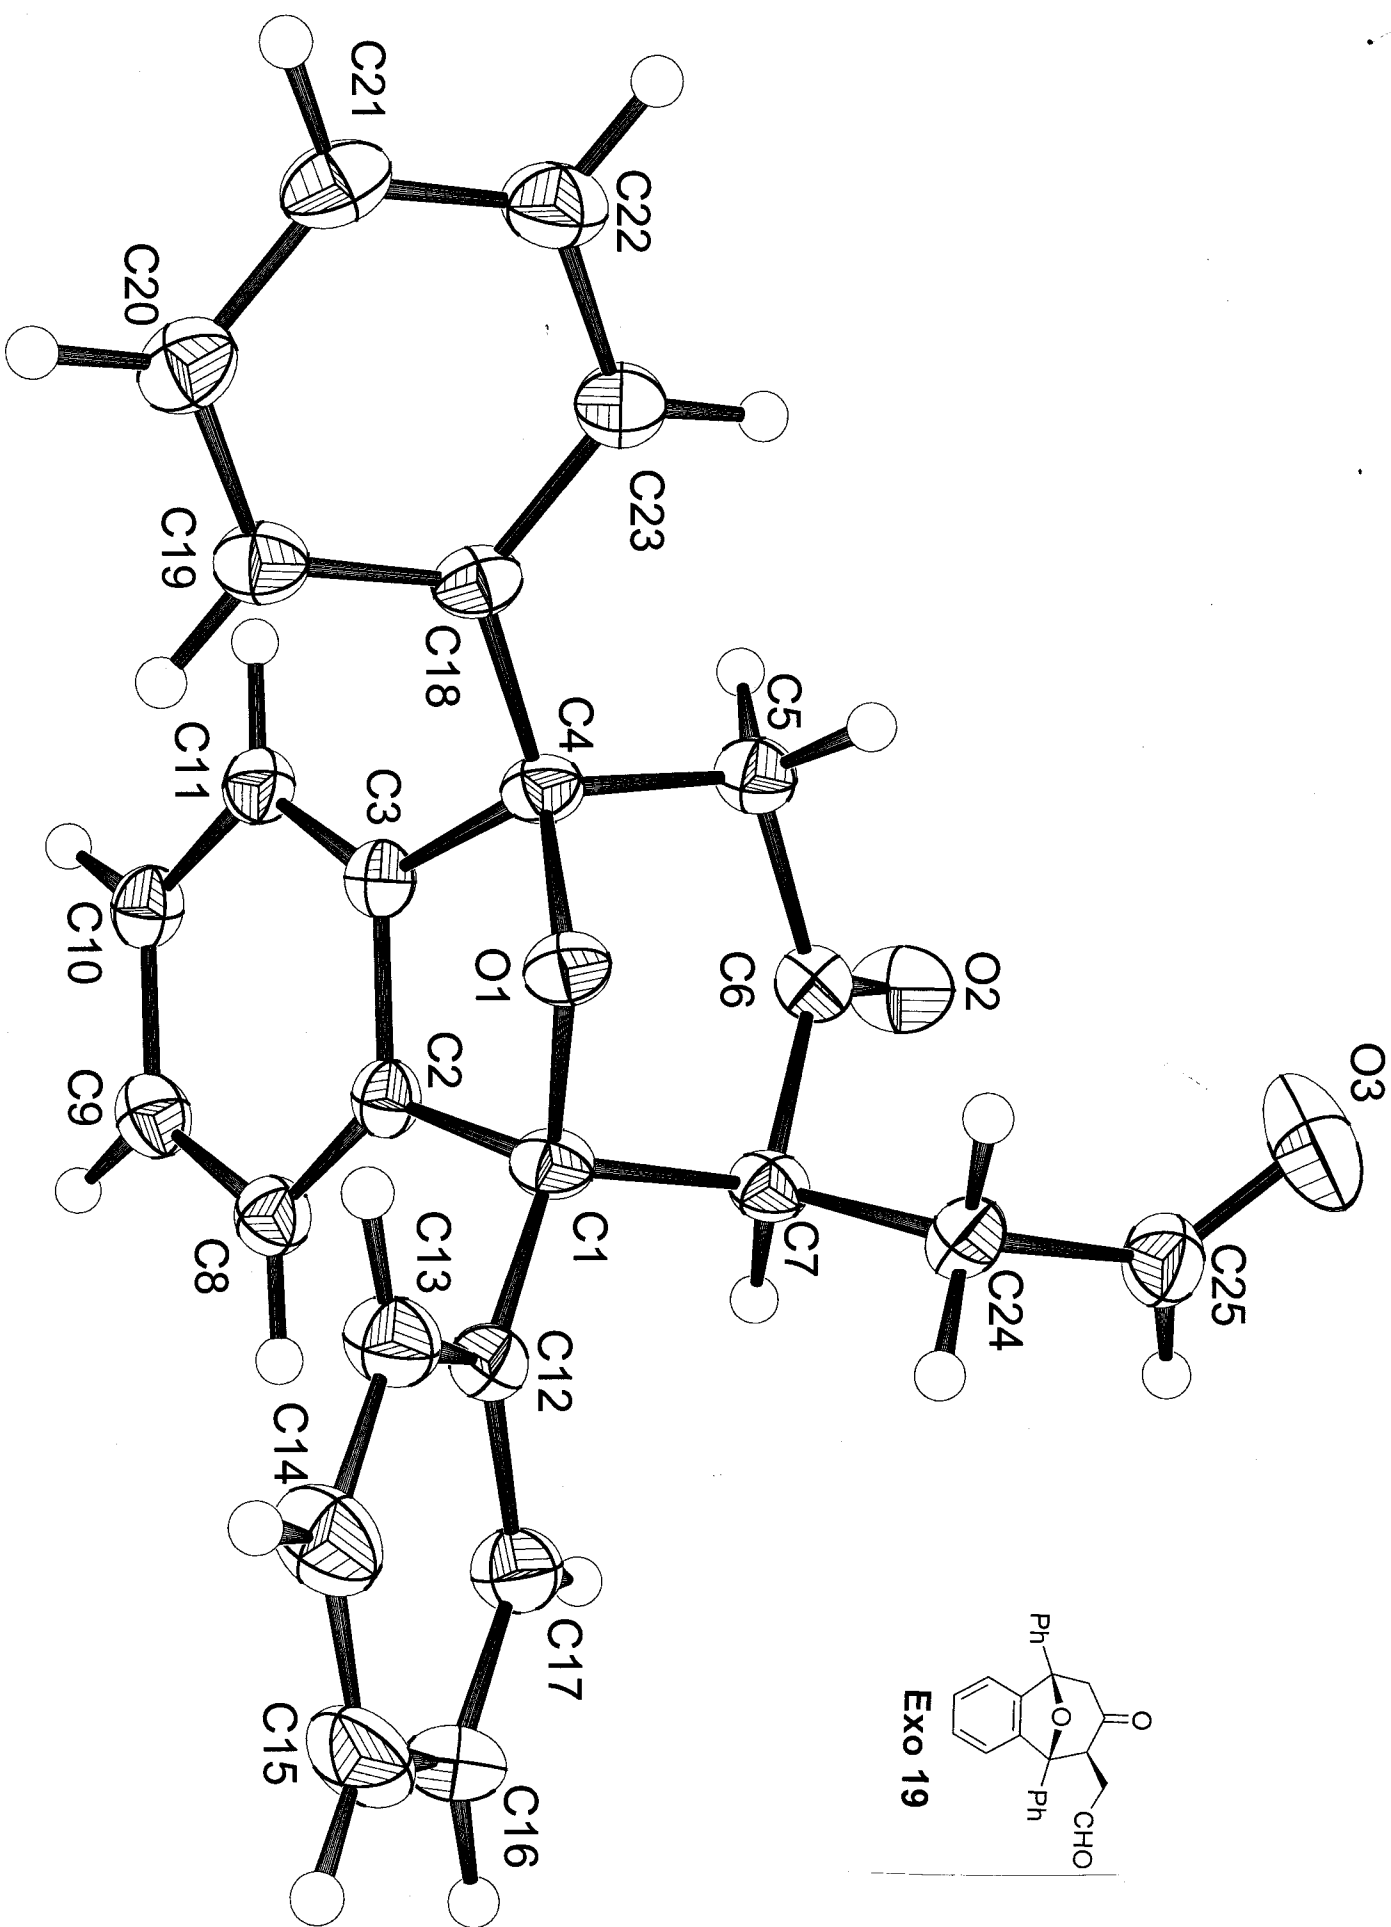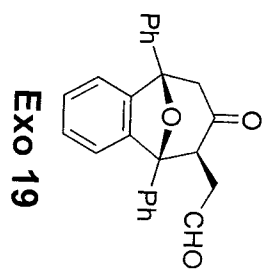

Table 1. Crystal data and structure refinement for sg77.

|                                   |                                                                                                                       |
|-----------------------------------|-----------------------------------------------------------------------------------------------------------------------|
| Identification code               | SG-77-2                                                                                                               |
| Empirical formula                 | C <sub>25</sub> H <sub>20</sub> O <sub>3</sub>                                                                        |
| Formula weight                    | 368.41                                                                                                                |
| Temperature                       | 173(2) K                                                                                                              |
| Wavelength                        | 0.71073 Å                                                                                                             |
| Crystal system, space group       | Monoclinic, P2 <sub>1</sub> -1/c                                                                                      |
| Unit cell dimensions              | a = 13.772(2) Å    alpha = 90 deg.<br>b = 16.105(3) Å    beta = 95.199(4) deg.<br>c = 8.5772(14) Å    gamma = 90 deg. |
| Volume                            | 1894.6(5) Å <sup>3</sup>                                                                                              |
| Z, Calculated density             | 4, 1.292 Mg/m <sup>3</sup>                                                                                            |
| Absorption coefficient            | 0.084 mm <sup>-1</sup>                                                                                                |
| F(000)                            | 776                                                                                                                   |
| Crystal size                      | 0.50 x 0.15 x 0.05 mm                                                                                                 |
| Theta range for data collection   | 1.48 to 27.19 deg.                                                                                                    |
| Limiting indices                  | -17<=h<=15, -20<=k<=20, -10<=l<=10                                                                                    |
| Reflections collected / unique    | 11734 / 4162 [R(int) = 0.1185]                                                                                        |
| Completeness to theta = 27.19     | 99.2 %                                                                                                                |
| Absorption correction             | Semi-empirical from equivalents                                                                                       |
| Max. and min. transmission        | 0.9958 and 0.9592                                                                                                     |
| Refinement method                 | Full-matrix least-squares on F <sup>2</sup>                                                                           |
| Data / restraints / parameters    | 4162 / 0 / 254                                                                                                        |
| Goodness-of-fit on F <sup>2</sup> | 0.921                                                                                                                 |
| Final R indices [I>2sigma(I)]     | R1 = 0.0546, wR2 = 0.0966                                                                                             |
| R indices (all data)              | R1 = 0.1973, wR2 = 0.1377                                                                                             |
| Extinction coefficient            | 0.0084(11)                                                                                                            |
| Largest diff. peak and hole       | 0.249 and -0.227 e.Å <sup>-3</sup>                                                                                    |

Table 2. Atomic coordinates ( $\times 10^{-4}$ ) and equivalent isotropic displacement parameters ( $\text{\AA}^2 \times 10^3$ ) for sg77.  
 $U(\text{eq})$  is defined as one third of the trace of the orthogonalized  $U_{ij}$  tensor.

|       | x       | y        | z        | $U(\text{eq})$ |
|-------|---------|----------|----------|----------------|
| O(1)  | 7909(1) | 9688(1)  | 3119(2)  | 24(1)          |
| O(2)  | 5088(1) | 9138(1)  | 3510(2)  | 38(1)          |
| O(3)  | 5999(2) | 7953(1)  | 6515(3)  | 58(1)          |
| C(1)  | 7353(2) | 10273(2) | 3981(3)  | 24(1)          |
| C(2)  | 6863(2) | 10812(2) | 2674(3)  | 23(1)          |
| C(3)  | 6833(2) | 10357(2) | 1282(4)  | 22(1)          |
| C(4)  | 7296(2) | 9512(2)  | 1661(3)  | 24(1)          |
| C(5)  | 6490(2) | 8918(2)  | 2114(3)  | 27(1)          |
| C(6)  | 5950(2) | 9275(2)  | 3430(3)  | 26(1)          |
| C(7)  | 6545(2) | 9764(2)  | 4716(3)  | 25(1)          |
| C(8)  | 6432(2) | 11587(2) | 2721(4)  | 28(1)          |
| C(9)  | 5983(2) | 11915(2) | 1337(4)  | 30(1)          |
| C(10) | 5955(2) | 11463(2) | -51(4)   | 27(1)          |
| C(11) | 6374(2) | 10682(2) | -87(4)   | 27(1)          |
| C(12) | 8033(2) | 10744(2) | 5166(3)  | 24(1)          |
| C(13) | 9036(2) | 10754(2) | 5035(4)  | 33(1)          |
| C(14) | 9655(2) | 11190(2) | 6126(4)  | 41(1)          |
| C(15) | 9291(2) | 11621(2) | 7340(4)  | 42(1)          |
| C(16) | 8292(2) | 11624(2) | 7456(4)  | 37(1)          |
| C(17) | 7672(2) | 11184(2) | 6388(4)  | 31(1)          |
| C(18) | 7933(2) | 9159(2)  | 470(3)   | 24(1)          |
| C(19) | 8589(2) | 9686(2)  | -196(4)  | 30(1)          |
| C(20) | 9202(2) | 9386(2)  | -1274(4) | 34(1)          |
| C(21) | 9166(2) | 8559(2)  | -1697(4) | 37(1)          |
| C(22) | 8517(2) | 8030(2)  | -1059(4) | 37(1)          |
| C(23) | 7898(2) | 8332(2)  | 21(4)    | 32(1)          |
| C(24) | 6962(2) | 9142(2)  | 5977(3)  | 28(1)          |
| C(25) | 6154(2) | 8680(2)  | 6673(4)  | 34(1)          |

Table 3. Bond lengths [Å] and angles [deg] for sg77.

---

|                   |            |
|-------------------|------------|
| O(1)-C(1)         | 1.458(3)   |
| O(1)-C(4)         | 1.472(3)   |
| O(2)-C(6)         | 1.215(3)   |
| O(3)-C(25)        | 1.197(3)   |
| C(1)-C(12)        | 1.521(4)   |
| C(1)-C(2)         | 1.526(4)   |
| C(1)-C(7)         | 1.559(4)   |
| C(2)-C(8)         | 1.385(4)   |
| C(2)-C(3)         | 1.398(4)   |
| C(3)-C(11)        | 1.385(4)   |
| C(3)-C(4)         | 1.525(4)   |
| C(4)-C(18)        | 1.517(4)   |
| C(4)-C(5)         | 1.541(4)   |
| C(5)-C(6)         | 1.520(4)   |
| C(6)-C(7)         | 1.531(4)   |
| C(7)-C(24)        | 1.546(4)   |
| C(8)-C(9)         | 1.392(4)   |
| C(9)-C(10)        | 1.392(4)   |
| C(10)-C(11)       | 1.387(4)   |
| C(12)-C(17)       | 1.394(4)   |
| C(12)-C(13)       | 1.396(4)   |
| C(13)-C(14)       | 1.397(4)   |
| C(14)-C(15)       | 1.382(4)   |
| C(15)-C(16)       | 1.388(4)   |
| C(16)-C(17)       | 1.389(4)   |
| C(18)-C(23)       | 1.386(4)   |
| C(18)-C(19)       | 1.399(4)   |
| C(19)-C(20)       | 1.394(4)   |
| C(20)-C(21)       | 1.380(4)   |
| C(21)-C(22)       | 1.384(4)   |
| C(22)-C(23)       | 1.401(4)   |
| C(24)-C(25)       | 1.506(4)   |
|                   |            |
| C(1)-O(1)-C(4)    | 105.53(19) |
| O(1)-C(1)-C(12)   | 109.9(2)   |
| O(1)-C(1)-C(2)    | 102.2(2)   |
| C(12)-C(1)-C(2)   | 114.3(2)   |
| O(1)-C(1)-C(7)    | 107.0(2)   |
| C(12)-C(1)-C(7)   | 114.3(2)   |
| C(2)-C(1)-C(7)    | 108.2(2)   |
| C(8)-C(2)-C(3)    | 121.2(3)   |
| C(8)-C(2)-C(1)    | 130.8(3)   |
| C(3)-C(2)-C(1)    | 107.9(2)   |
| C(11)-C(3)-C(2)   | 120.1(3)   |
| C(11)-C(3)-C(4)   | 131.9(3)   |
| C(2)-C(3)-C(4)    | 107.8(3)   |
| O(1)-C(4)-C(18)   | 108.8(2)   |
| O(1)-C(4)-C(3)    | 101.9(2)   |
| C(18)-C(4)-C(3)   | 116.5(2)   |
| O(1)-C(4)-C(5)    | 106.0(2)   |
| C(18)-C(4)-C(5)   | 114.3(2)   |
| C(3)-C(4)-C(5)    | 108.1(2)   |
| C(6)-C(5)-C(4)    | 111.4(2)   |
| O(2)-C(6)-C(5)    | 121.3(3)   |
| O(2)-C(6)-C(7)    | 121.0(3)   |
| C(5)-C(6)-C(7)    | 117.6(3)   |
| C(6)-C(7)-C(24)   | 108.1(2)   |
| C(6)-C(7)-C(1)    | 109.5(2)   |
| C(24)-C(7)-C(1)   | 113.0(2)   |
| C(2)-C(8)-C(9)    | 118.4(3)   |
| C(8)-C(9)-C(10)   | 120.4(3)   |
| C(11)-C(10)-C(9)  | 120.9(3)   |
| C(3)-C(11)-C(10)  | 118.9(3)   |
| C(17)-C(12)-C(13) | 118.6(3)   |
| C(17)-C(12)-C(1)  | 121.0(3)   |
| C(13)-C(12)-C(1)  | 120.4(3)   |
| C(12)-C(13)-C(14) | 120.0(3)   |
| C(15)-C(14)-C(13) | 121.1(3)   |

|                   |          |
|-------------------|----------|
| C(14)-C(15)-C(16) | 119.0(3) |
| C(15)-C(16)-C(17) | 120.4(3) |
| C(16)-C(17)-C(12) | 121.0(3) |
| C(23)-C(18)-C(19) | 118.5(3) |
| C(23)-C(18)-C(4)  | 122.6(3) |
| C(19)-C(18)-C(4)  | 118.8(3) |
| C(20)-C(19)-C(18) | 120.8(3) |
| C(21)-C(20)-C(19) | 120.0(3) |
| C(20)-C(21)-C(22) | 120.0(3) |
| C(21)-C(22)-C(23) | 120.1(3) |
| C(18)-C(23)-C(22) | 120.6(3) |
| C(25)-C(24)-C(7)  | 110.9(2) |
| O(3)-C(25)-C(24)  | 124.7(3) |

---

Symmetry transformations used to generate equivalent atoms:

Table 4. Anisotropic displacement parameters ( $\text{\AA}^2 \times 10^{-3}$ ) for sg77.  
The anisotropic displacement factor exponent takes the form:  
 $-2 \pi^2 [ h^2 a^{*2} U_{11} + \dots + 2 h k a^* b^* U_{12} ]$

|       | U11   | U22   | U33   | U23    | U13   | U12    |
|-------|-------|-------|-------|--------|-------|--------|
| O(1)  | 21(1) | 29(1) | 23(1) | -3(1)  | 2(1)  | 1(1)   |
| O(2)  | 21(1) | 50(2) | 43(2) | -11(1) | 6(1)  | -6(1)  |
| O(3)  | 52(2) | 29(2) | 96(2) | 6(1)   | 22(2) | -3(1)  |
| C(1)  | 20(2) | 26(2) | 26(2) | -5(2)  | 5(1)  | 3(1)   |
| C(2)  | 20(2) | 24(2) | 24(2) | 2(2)   | 2(1)  | -2(1)  |
| C(3)  | 16(2) | 25(2) | 25(2) | 1(2)   | 2(1)  | -2(1)  |
| C(4)  | 24(2) | 28(2) | 20(2) | -4(1)  | 0(1)  | -2(1)  |
| C(5)  | 26(2) | 27(2) | 28(2) | -2(2)  | 3(2)  | 0(1)   |
| C(6)  | 24(2) | 25(2) | 28(2) | -1(2)  | 2(2)  | 0(1)   |
| C(7)  | 24(2) | 24(2) | 27(2) | -4(1)  | 6(2)  | 3(1)   |
| C(8)  | 27(2) | 28(2) | 30(2) | 0(2)   | 4(2)  | -1(2)  |
| C(9)  | 31(2) | 25(2) | 36(2) | 2(2)   | 4(2)  | 1(1)   |
| C(10) | 25(2) | 30(2) | 26(2) | 5(2)   | -1(2) | 0(1)   |
| C(11) | 27(2) | 28(2) | 26(2) | 0(2)   | 4(2)  | -4(1)  |
| C(12) | 25(2) | 23(2) | 25(2) | -1(2)  | 3(2)  | 0(1)   |
| C(13) | 29(2) | 34(2) | 36(2) | -5(2)  | 6(2)  | -4(2)  |
| C(14) | 31(2) | 40(2) | 53(2) | -6(2)  | 3(2)  | -9(2)  |
| C(15) | 41(2) | 38(2) | 46(2) | -7(2)  | -8(2) | -14(2) |
| C(16) | 47(2) | 35(2) | 29(2) | -10(2) | 2(2)  | -5(2)  |
| C(17) | 29(2) | 35(2) | 31(2) | -3(2)  | 4(2)  | -3(2)  |
| C(18) | 22(2) | 28(2) | 22(2) | -2(2)  | 2(1)  | 7(1)   |
| C(19) | 26(2) | 33(2) | 30(2) | -4(2)  | 3(2)  | 2(2)   |
| C(20) | 26(2) | 43(2) | 34(2) | -1(2)  | 8(2)  | -1(2)  |
| C(21) | 34(2) | 46(2) | 32(2) | -4(2)  | 11(2) | 8(2)   |
| C(22) | 40(2) | 33(2) | 37(2) | -7(2)  | 7(2)  | 6(2)   |
| C(23) | 35(2) | 29(2) | 34(2) | -2(2)  | 10(2) | 4(2)   |
| C(24) | 29(2) | 33(2) | 22(2) | 3(2)   | 3(2)  | -2(2)  |
| C(25) | 36(2) | 33(2) | 36(2) | 4(2)   | 10(2) | 1(2)   |



Table 5. Hydrogen coordinates ( $\times 10^4$ ) and isotropic displacement parameters ( $\text{\AA}^2 \times 10^3$ ) for sg77.

|        | x     | y     | z     | U(eq) |
|--------|-------|-------|-------|-------|
| H(5A)  | 6022  | 8817  | 1188  | 32    |
| H(5B)  | 6784  | 8379  | 2450  | 32    |
| H(7)   | 6102  | 10159 | 5205  | 30    |
| H(8)   | 6442  | 11888 | 3675  | 34    |
| H(9)   | 5693  | 12450 | 1339  | 36    |
| H(10)  | 5645  | 11694 | -986  | 33    |
| H(11)  | 6346  | 10374 | -1035 | 32    |
| H(13)  | 9298  | 10465 | 4203  | 39    |
| H(14)  | 10337 | 11191 | 6034  | 49    |
| H(15)  | 9717  | 11911 | 8083  | 51    |
| H(16)  | 8031  | 11928 | 8270  | 44    |
| H(17)  | 6991  | 11182 | 6492  | 38    |
| H(19)  | 8616  | 10256 | 89    | 36    |
| H(20)  | 9645  | 9750  | -1716 | 40    |
| H(21)  | 9587  | 8354  | -2426 | 44    |
| H(22)  | 8491  | 7461  | -1353 | 44    |
| H(23)  | 7451  | 7966  | 450   | 39    |
| H(24A) | 7393  | 8740  | 5501  | 33    |
| H(24B) | 7358  | 9445  | 6814  | 33    |
| H(25)  | 5738  | 8989  | 7282  | 41    |

Table 6. Torsion angles [deg] for sg77.

|                         |           |
|-------------------------|-----------|
| C(4)-O(1)-C(1)-C(12)    | -158.6(2) |
| C(4)-O(1)-C(1)-C(2)     | -36.8(2)  |
| C(4)-O(1)-C(1)-C(7)     | 76.7(2)   |
| O(1)-C(1)-C(2)-C(8)     | -162.5(3) |
| C(12)-C(1)-C(2)-C(8)    | -43.8(4)  |
| C(7)-C(1)-C(2)-C(8)     | 84.8(3)   |
| O(1)-C(1)-C(2)-C(3)     | 22.3(3)   |
| C(12)-C(1)-C(2)-C(3)    | 141.0(2)  |
| C(7)-C(1)-C(2)-C(3)     | -90.4(3)  |
| C(8)-C(2)-C(3)-C(11)    | 0.6(4)    |
| C(1)-C(2)-C(3)-C(11)    | 176.3(2)  |
| C(8)-C(2)-C(3)-C(4)     | -175.4(2) |
| C(1)-C(2)-C(3)-C(4)     | 0.4(3)    |
| C(1)-O(1)-C(4)-C(18)    | 160.7(2)  |
| C(1)-O(1)-C(4)-C(3)     | 37.0(2)   |
| C(1)-O(1)-C(4)-C(5)     | -76.0(2)  |
| C(11)-C(3)-C(4)-O(1)    | 162.1(3)  |
| C(2)-C(3)-C(4)-O(1)     | -22.7(3)  |
| C(11)-C(3)-C(4)-C(18)   | 43.9(4)   |
| C(2)-C(3)-C(4)-C(18)    | -140.9(3) |
| C(11)-C(3)-C(4)-C(5)    | -86.5(4)  |
| C(2)-C(3)-C(4)-C(5)     | 88.8(3)   |
| O(1)-C(4)-C(5)-C(6)     | 54.3(3)   |
| C(18)-C(4)-C(5)-C(6)    | 174.1(2)  |
| C(3)-C(4)-C(5)-C(6)     | -54.4(3)  |
| C(4)-C(5)-C(6)-O(2)     | 146.9(3)  |
| C(4)-C(5)-C(6)-C(7)     | -37.2(3)  |
| O(2)-C(6)-C(7)-C(24)    | 88.9(3)   |
| C(5)-C(6)-C(7)-C(24)    | -86.9(3)  |
| O(2)-C(6)-C(7)-C(1)     | -147.6(3) |
| C(5)-C(6)-C(7)-C(1)     | 36.6(3)   |
| O(1)-C(1)-C(7)-C(6)     | -54.5(3)  |
| C(12)-C(1)-C(7)-C(6)    | -176.5(2) |
| C(2)-C(1)-C(7)-C(6)     | 55.0(3)   |
| O(1)-C(1)-C(7)-C(24)    | 66.1(3)   |
| C(12)-C(1)-C(7)-C(24)   | -55.8(3)  |
| C(2)-C(1)-C(7)-C(24)    | 175.6(2)  |
| C(3)-C(2)-C(8)-C(9)     | -1.4(4)   |
| C(1)-C(2)-C(8)-C(9)     | -176.1(3) |
| C(2)-C(8)-C(9)-C(10)    | 1.2(4)    |
| C(8)-C(9)-C(10)-C(11)   | -0.1(4)   |
| C(2)-C(3)-C(11)-C(10)   | 0.5(4)    |
| C(4)-C(3)-C(11)-C(10)   | 175.3(3)  |
| C(9)-C(10)-C(11)-C(3)   | -0.7(4)   |
| O(1)-C(1)-C(12)-C(17)   | -163.9(2) |
| C(2)-C(1)-C(12)-C(17)   | 81.8(3)   |
| C(7)-C(1)-C(12)-C(17)   | -43.6(4)  |
| O(1)-C(1)-C(12)-C(13)   | 17.0(4)   |
| C(2)-C(1)-C(12)-C(13)   | -97.3(3)  |
| C(7)-C(1)-C(12)-C(13)   | 137.3(3)  |
| C(17)-C(12)-C(13)-C(14) | 0.8(4)    |
| C(1)-C(12)-C(13)-C(14)  | 179.9(3)  |
| C(12)-C(13)-C(14)-C(15) | -0.5(5)   |
| C(13)-C(14)-C(15)-C(16) | -0.6(5)   |
| C(14)-C(15)-C(16)-C(17) | 1.4(5)    |
| C(15)-C(16)-C(17)-C(12) | -1.1(5)   |
| C(13)-C(12)-C(17)-C(16) | 0.0(4)    |
| C(1)-C(12)-C(17)-C(16)  | -179.1(3) |
| O(1)-C(4)-C(18)-C(23)   | 108.3(3)  |
| C(3)-C(4)-C(18)-C(23)   | -137.3(3) |
| C(5)-C(4)-C(18)-C(23)   | -10.0(4)  |
| O(1)-C(4)-C(18)-C(19)   | -71.2(3)  |
| C(3)-C(4)-C(18)-C(19)   | 43.2(4)   |
| C(5)-C(4)-C(18)-C(19)   | 170.5(3)  |
| C(23)-C(18)-C(19)-C(20) | -0.7(4)   |
| C(4)-C(18)-C(19)-C(20)  | 178.8(3)  |
| C(18)-C(19)-C(20)-C(21) | 0.1(5)    |
| C(19)-C(20)-C(21)-C(22) | 0.4(5)    |

|                         |           |
|-------------------------|-----------|
| C(20)-C(21)-C(22)-C(23) | -0.2(5)   |
| C(19)-C(18)-C(23)-C(22) | 0.9(4)    |
| C(4)-C(18)-C(23)-C(22)  | -178.6(3) |
| C(21)-C(22)-C(23)-C(18) | -0.4(5)   |
| C(6)-C(7)-C(24)-C(25)   | -59.8(3)  |
| C(1)-C(7)-C(24)-C(25)   | 178.7(2)  |
| C(7)-C(24)-C(25)-O(3)   | 113.1(4)  |

---

Symmetry transformations used to generate equivalent atoms:
